# Supplementary material for: RNF4 sustains Myc-driven tumorigenesis by facilitating DNA replication
Source: J Clin Invest. 2024 Mar 26;134(10):e167419. doi: 10.1172/JCI167419 (PMC11093604; doi:10.1172/JCI167419)
Supplement: Supplemental table 5 [file jci-134-167419-s139.xlsx]

## Sheet: output
Supplemental Table 5
Genes	Protein description	WT IgG	WT-1	WT-2	WT-3	WT-4	R4-1	R4-2	R4-3	R4-4
ACO2	Aconitate hydratase, mitochondrial (Aconitase) (EC 4.2.1.3) (Citrate hydro-lyase)	346347	415626	407590	421710	410748	473949	520805	428056	426795
ALG5	Dolichyl-phosphate beta-glucosyltransferase (DolP-glucosyltransferase) (EC 2.4.1.117) (Asparagine-linked glycosylation protein 5 homolog)			67476.4		122067	91421.1	58013.6	114316	115646
ARL1	ADP-ribosylation factor-like protein 1	316787	230868	330667	531693	126931	344827	262790	335295	334297
BMS1	Ribosome biogenesis protein BMS1 homolog (Ribosome assembly protein BMS1 homolog)	630901	1407670	1328030	958284	1270780	831162	749713	726680	738558
CCT2	T-complex protein 1 subunit beta (TCP-1-beta) (CCT-beta)	980945	874481	760753	998698	740287	912940	879606	901628	933789
CCT3	T-complex protein 1 subunit gamma (TCP-1-gamma) (CCT-gamma) (hTRiC5)	1736960	1820610	1742710	1955500	1962900	2200570	2102300	2342480	2145580
CCT5	T-complex protein 1 subunit epsilon (TCP-1-epsilon) (CCT-epsilon)	1191390	1125890	1116240	1114500	1172240	1229700	1311850	1476210	1476630
CCT7	T-complex protein 1 subunit eta (TCP-1-eta) (CCT-eta) (HIV-1 Nef-interacting protein) [Cleaved into: T-complex protein 1 subunit eta, N-terminally processed]	2212810	2195620	2202750	2459130	2326770	2493220	2780550	2959920	2850180
CCT8	T-complex protein 1 subunit theta (TCP-1-theta) (CCT-theta) (Chaperonin containing T-complex polypeptide 1 subunit 8) (Renal carcinoma antigen NY-REN-15)	3985470	3556520	3680490	3635950	3903700	4179650	4591140	4830650	4521510
CDC42	Cell division control protein 42 homolog (EC 3.6.5.2) (G25K GTP-binding protein)	449558	488066	722988	561015	556684	439642	612143	451814	498954
CYC1	Cytochrome c1, heme protein, mitochondrial (EC 7.1.1.8) (Complex III subunit 4) (Complex III subunit IV) (Cytochrome b-c1 complex subunit 4) (Ubiquinol-cytochrome-c reductase complex cytochrome c1 subunit) (Cytochrome c-1)	94911	56761.8	110339	277119	117213	58193	86534.9	112711	94493.9
DPH1	#N/A			32046.6			20292.5	89923.5	22860	25621.9
DRG1	Developmentally-regulated GTP-binding protein 1 (DRG-1) (Neural precursor cell expressed developmentally down-regulated protein 3) (NEDD-3) (Translation factor GTPase DRG1) (TRAFAC GTPase DRG1) (EC 3.6.5.-)	544224	412159	430989	337023	374295	470306	568313	575809	520646
ELP3	Elongator complex protein 3 (hELP3) (EC 2.3.1.-) (tRNA uridine(34) acetyltransferase)	326322	333957	308815	236354	364138	414250	405132	471185	441224
ENO1	Alpha-enolase (EC 4.2.1.11) (2-phospho-D-glycerate hydro-lyase) (C-myc promoter-binding protein) (Enolase 1) (MBP-1) (MPB-1) (Non-neural enolase) (NNE) (Phosphopyruvate hydratase) (Plasminogen-binding protein)	1674170	1529320	1513360	31822400	1241650	1383740	1574800	1177620	1348120
GAR1	H/ACA ribonucleoprotein complex subunit 1 (Nucleolar protein family A member 1) (snoRNP protein GAR1)	1672260	1338120	1166950	1125090	1005660	1111240	1089900	1155460	982889
GDI1	Rab GDP dissociation inhibitor alpha (Rab GDI alpha) (Guanosine diphosphate dissociation inhibitor 1) (GDI-1) (Oligophrenin-2) (Protein XAP-4)	196862	115195	108633	378801	91307.4	103368	134660	106986	66411.7
GET3	ATPase GET3 (EC 3.6.-.-) (Arsenical pump-driving ATPase) (Arsenite-stimulated ATPase) (Guided entry of tail-anchored proteins factor 3, ATPase) (Transmembrane domain recognition complex 40 kDa ATPase subunit) (hARSA-I) (hASNA-I)	273047	290153	217617	112214	241653	361818	316298	354530	345772
GPD2	Glycerol-3-phosphate dehydrogenase, mitochondrial (GPD-M) (GPDH-M) (EC 1.1.5.3) (mitohondrial glycerophosphate dehydrogenase gene) (mGDH) (mtGPD)	214795	324970	291396	788018	395402	374969	277281	314946	451904
HAS1	Hyaluronan synthase 1 (EC 2.4.1.212) (Hyaluronate synthase 1) (Hyaluronic acid synthase 1) (HA synthase 1) (HuHAS1)			396752			601579
INO80	Chromatin-remodeling ATPase INO80 (hINO80) (EC 3.6.4.-) (DNA helicase-related INO80 complex homolog 1) (DNA helicase-related protein INO80) (INO80 complex subunit A)	446718	522426	558193	1669220	605452	540634	574242	585762	583935
KRR1	KRR1 small subunit processome component homolog (HIV-1 Rev-binding protein 2) (KRR-R motif-containing protein 1) (Rev-interacting protein 1) (Rip-1)	228923	356281	354336	401474	350590	362159	328038	322439	296601
MCM2	DNA replication licensing factor MCM2 (EC 3.6.4.12) (Minichromosome maintenance protein 2 homolog) (Nuclear protein BM28)	3563370	3508260	3612180	2834460	4001810	3611410	3414680	3535370	3808400
MCM3	DNA replication licensing factor MCM3 (EC 3.6.4.12) (DNA polymerase alpha holoenzyme-associated protein P1) (P1-MCM3) (RLF subunit beta) (p102)	7476400	7101620	6930040	6138140	7537460	7175730	6913880	7251130	7431890
MCM6	DNA replication licensing factor MCM6 (EC 3.6.4.12) (p105MCM)	4126900	7394290	6969870	6318030	8491260	5984860	5851980	5817120	6186730
MDN1	Midasin (Dynein-related AAA-ATPase MDN1) (MIDAS-containing protein)	364133	382347	443603	389061	499943	465729	502338	467614	440509
MRPL19	Large ribosomal subunit protein bL19m (39S ribosomal protein L15, mitochondrial) (L15mt) (MRP-L15) (39S ribosomal protein L19, mitochondrial) (L19mt) (MRP-L19)	123979	97355.5	148890		129363	150002	169180	187683	158158
MRPS9	Small ribosomal subunit protein uS9m (28S ribosomal protein S9, mitochondrial) (MRP-S9) (S9mt)			46651.6	17458.3	29174.3	14572.8	15275.3
NFS1	Cysteine desulfurase (EC 2.8.1.7)	125714	102517	96495	55530.6	97666.1	94657.9	102705	144754	146357
NIP7	60S ribosome subunit biogenesis protein NIP7 homolog (KD93) (Nucleolar pre-rRNA processing protein NIP7)	455273	374842	371646	397121	352276	437584	389119	378528	373053
NMD3	60S ribosomal export protein NMD3 (hNMD3)	635004	599548	612728	545195	614079	629650	681051	603823	600737
NOP10	H/ACA ribonucleoprotein complex subunit 3 (Nucleolar protein 10) (Nucleolar protein family A member 3) (snoRNP protein NOP10)	155345	176628	185501	168563	131976	140289	160198	152587	168201
NOP58	Nucleolar protein 58 (Nucleolar protein 5)	1488310	7362260	7240360	5504320	7211610	4716320	4446010	3785970	3662220
NOP9	#N/A		74597.1	65081	42502.9		69727.3	73347.8	75139.9	68852.9
NUP188	Nucleoporin NUP188 (hNup188)	273606	399537	354701	317954	486610	414753	447578	430117	438006
ORC1	Origin recognition complex subunit 1 (Replication control protein 1)	986309	1346920	1217380	1039150	1189230	1051450	1163050	973009	919471
PGK1	Phosphoglycerate kinase 1 (EC 2.7.2.3) (Cell migration-inducing gene 10 protein) (Primer recognition protein 2) (PRP 2)	671471	500663	547818	3093220	640473	468070	450619	615744	696872
PNO1	RNA-binding protein PNO1 (Partner of NOB1)	286362	452397	374516	466874	134102	268079	340626	329697	325821
PUS1	Pseudouridylate synthase 1 homolog (EC 5.4.99.-) (tRNA pseudouridine synthase 1) (EC 5.4.99.12) (tRNA pseudouridine(38-40) synthase) (tRNA pseudouridylate synthase I) (tRNA-uridine isomerase I)	465454	445229	460554	383559	462888	431695	406617	511063	473919
PWP2	Periodic tryptophan protein 2 homolog	3245200	4534940	4290860	3959030	3997880	3402690	3432640	2850810	3007650
RAD50	DNA repair protein RAD50 (hRAD50) (EC 3.6.-.-)	185665	243938	220167	170891	168798	233243	200259	228032	236372
RAD51	DNA repair protein RAD51 homolog 1 (HsRAD51) (hRAD51) (RAD51 homolog A)	166924	139329	180679	122536	131808	77741.7	113010	136167	149631
RCL1	RNA 3'-terminal phosphate cyclase-like protein	2330160	2552130	2322040	1614710	2217400	1895270	1797570	1734670	1600420
RFC3	Replication factor C subunit 3 (Activator 1 38 kDa subunit) (A1 38 kDa subunit) (Activator 1 subunit 3) (Replication factor C 38 kDa subunit) (RF-C 38 kDa subunit) (RFC38)	110311	153236	130739	182225	147326	171124	189854	195785	142818
RFC4	Replication factor C subunit 4 (Activator 1 37 kDa subunit) (A1 37 kDa subunit) (Activator 1 subunit 4) (Replication factor C 37 kDa subunit) (RF-C 37 kDa subunit) (RFC37)	208749	254851	216026	150169	210656	323298	375750	304774	289515
RFC5	Replication factor C subunit 5 (Activator 1 36 kDa subunit) (A1 36 kDa subunit) (Activator 1 subunit 5) (Replication factor C 36 kDa subunit) (RF-C 36 kDa subunit) (RFC36)	630874	681391	667488	723221	634908	758758	884870	759996	878687
RPL10	Large ribosomal subunit protein uL16 (60S ribosomal protein L10) (Laminin receptor homolog) (Protein QM) (Ribosomal protein L10) (Tumor suppressor QM)	1164010	1226770	1486400	1441180	1418940	1681030	1647440	1843780	1603420
	Ribosomal protein L10		33361.2	53140.3	47159.2	51691	45095.7	74084.2	33388.7	42496.9
RPL10A	Large ribosomal subunit protein uL1 (60S ribosomal protein L10a) (CSA-19) (Neural precursor cell expressed developmentally down-regulated protein 6) (NEDD-6)	2283200	2316210	2321290	2446090	2014650	2628960	2789030	2391580	2265590
RPL11	Large ribosomal subunit protein uL5 (60S ribosomal protein L11) (CLL-associated antigen KW-12)	6021320	5375790	6118750	5069480	5297220	6820990	6707330	6175330	6934720
RPL12	Large ribosomal subunit protein uL11 (60S ribosomal protein L12)	5026540	5152070	4841810	4832870	4349290	5384480	5379020	5160160	4595930
RPL13	Large ribosomal subunit protein eL13 (60S ribosomal protein L13) (Breast basic conserved protein 1)	3292820	3849380	3524200	2576690	2665500	3647340	3498150	3814040	3021130
RPL18	Large ribosomal subunit protein eL18 (60S ribosomal protein L18)	2634620	2243500	2019040	1442630	1734600	2236800	2057400	2048410	2406340
RPL23A	Large ribosomal subunit protein uL23 (60S ribosomal protein L23a)	3260440	2678410	2835150	2240470	2304410	2843370	3048480	3103140	2820390
RPL28	Large ribosomal subunit protein eL28 (60S ribosomal protein L28)	1217560	1497160	1656890	1133660	1245380	1742720	1783360	1958520	1571350
RPL29	Large ribosomal subunit protein eL29 (60S ribosomal protein L29) (Cell surface heparin-binding protein HIP)	1152080	965359	663823	1521960	602169	834021	907713	747879	859984
RPL30	Large ribosomal subunit protein eL30 (60S ribosomal protein L30)	2036890	2543960	2838210	2709320	2412570	2855270	3127730	2794900	2407070
RPL32	Large ribosomal subunit protein eL32 (60S ribosomal protein L32)	758450	531906	509853	585650	449412	594158	536219	565745	491527
RPL5	Large ribosomal subunit protein uL18 (60S ribosomal protein L5)	3546990	4881950	5349280	3946190	5017580	5614880	5674270	5583650	4458490
RPL6	Large ribosomal subunit protein eL6 (60S ribosomal protein L6) (Neoplasm-related protein C140) (Tax-responsive enhancer element-binding protein 107) (TaxREB107)	9603090	12259000	13581400	10737900	11518400	13260100	14000700	12971700	11523800
RPS10	Small ribosomal subunit protein eS10 (40S ribosomal protein S10)	306607	170752	202848	264931	144423	219078	190920	207185	176634
RPS13	Small ribosomal subunit protein uS15 (40S ribosomal protein S13)	3980610	2852470	3128150	2697490	2362230	3436720	2790220	3191530	3295110
RPS18	Small ribosomal subunit protein uS13 (40S ribosomal protein S18) (Ke-3) (Ke3)	1690110	1470060	1625180	1647370	1365990	1805350	1658380	1886680	1624320
RPS20	Small ribosomal subunit protein uS10 (40S ribosomal protein S20)	1090210	1055240	911922	1117890	854891	926966	816779	930340	1124750
RPS24	Small ribosomal subunit protein eS24 (40S ribosomal protein S24)	2413970	1897640	2092650	1928830	1713410	2295150	2055380	2434580	2158790
RPS3	Small ribosomal subunit protein uS3 (40S ribosomal protein S3) (EC 4.2.99.18)	5439780	5558770	5822100	5759660	5354870	7384600	7922320	7314270	6785800
RPS5	Small ribosomal subunit protein uS7 (40S ribosomal protein S5) [Cleaved into: Small ribosomal subunit protein uS7, N-terminally processed (40S ribosomal protein S5, N-terminally processed)]	976552	994734	885141	1141450	727823	1346180	1297880	1078330	1183750
RRP8	Ribosomal RNA-processing protein 8 (EC 2.1.1.-) (Cerebral protein 1) (Nucleomethylin)	376802	636683	679171	379586	684507	551221	456645	519068	319084
RRP9	U3 small nucleolar RNA-interacting protein 2 (RRP9 homolog) (U3 small nucleolar ribonucleoprotein-associated 55 kDa protein) (U3 snoRNP-associated 55 kDa protein) (U3-55K)	6551170	7529640	7013790	6254140	6844420	6830490	6485250	6307850	6441820
SEC13	Protein SEC13 homolog (GATOR complex protein SEC13) (SEC13-like protein 1) (SEC13-related protein)	1311160	1026850	970755	1241060	992518	1272380	1135610	1152290	954306
SKP1	S-phase kinase-associated protein 1 (Cyclin-A/CDK2-associated protein p19) (p19A) (Organ of Corti protein 2) (OCP-2) (Organ of Corti protein II) (OCP-II) (RNA polymerase II elongation factor-like protein) (SIII) (Transcription elongation factor B polypeptide 1-like) (p19skp1)	30338.5	60057.7	53032.5	102658	53738.9	58781.1	66794.1	45424.3	59787.2
SMC2	Structural maintenance of chromosomes protein 2 (SMC protein 2) (SMC-2) (Chromosome-associated protein E) (hCAP-E) (XCAP-E homolog)	339870	471901	444212	335671	413691	485951	491151	496642	520276
SMC3	Structural maintenance of chromosomes protein 3 (SMC protein 3) (SMC-3) (Basement membrane-associated chondroitin proteoglycan) (Bamacan) (Chondroitin sulfate proteoglycan 6) (Chromosome-associated polypeptide) (hCAP)	988673	1339680	1178150	906429	1154140	974516	995567	958990	1050640
SMC4	Structural maintenance of chromosomes protein 4 (SMC protein 4) (SMC-4) (Chromosome-associated polypeptide C) (hCAP-C) (XCAP-C homolog)	616442	640524	626483	578432	604112	627160	583691	586222	607514
SNU13	NHP2-like protein 1 (High mobility group-like nuclear protein 2 homolog 1) (OTK27) (SNU13 homolog) (hSNU13) (U4/U6.U5 small nuclear ribonucleoprotein SNU13) (U4/U6.U5 tri-snRNP 15.5 kDa protein) [Cleaved into: NHP2-like protein 1, N-terminally processed]	451933	434843	453874	330583	324020	544278	504282	375840	349434
SRP54	Signal recognition particle subunit SRP54 (EC 3.6.5.4) (Signal recognition particle 54 kDa protein)	227525	177990	145678	216997	169297	205652	188250	280678	244580
TCP1	T-complex protein 1 subunit alpha (TCP-1-alpha) (CCT-alpha)	4664940	4047070	4443630	3766550	5250820	4891390	5232570	6637240	5649460
TOP1	DNA topoisomerase 1 (EC 5.6.2.1) (DNA topoisomerase I)	3922530	5285130	5662390	4606640	4011530	3954770	3898310	3633680	3696630
TSR1	#N/A	108678	73965.5	77438.4	64165.2	41254.1	102921	52631.8	92983.5	91378.9
UTP20	Small subunit processome component 20 homolog (Down-regulated in metastasis protein) (Novel nucleolar protein 73) (NNP73) (Protein Key-1A6)	282830	1036060	948677	560915	1006950	520122	404922	448567	430043
UTP4	U3 small nucleolar RNA-associated protein 4 homolog (Cirhin) (UTP4 small subunit processome component)	1969020	2524640	2347910	1420240	2326470	2040150	1778470	1770380	1908210
(blank)	Ig-like domain-containing protein	87050200	50701700	47247700	49038600	53657200	51345300	55054700	57985100	55153700
	(blank)
ARID1B	AT-rich interactive domain-containing protein 1B (ARID domain-containing protein 1B) (BRG1-associated factor 250b) (BAF250B) (BRG1-binding protein hELD/OSA1) (Osa homolog 2) (hOsa2) (p250R)	264511	254825	252067	163302	215449	218498	262454	194913	218800
SRP14	#N/A	115550	125206	87782.4	179080	133044	95634.8	105095	63271.2	127959
ZFP91	#N/A		92881.5	130339		135380	55391	112135
RPL4	Large ribosomal subunit protein uL4 (60S ribosomal protein L1) (60S ribosomal protein L4)	6120230	6498210	6688680	4526720	5469660	6089420	6292740	6956680	5950780
RTF1	RNA polymerase-associated protein RTF1 homolog	71920.6	57395.2	96602.6	85446.3	77442.6	104343	92707.4	123667	117799
SAMD1	#N/A					27123.6	34036.3
CLPX	ATP-dependent Clp protease ATP-binding subunit clpX-like, mitochondrial		55549.9	65750.4	98836.2	52795.2	62967.2	39505.3	97700.5	93068.7
RCC2	Protein RCC2 (RCC1-like protein TD-60) (Telophase disk protein of 60 kDa)	4532310	4687010	4822670	4995310	4279750	4084950	4022560	3912660	3543300
VKORC1L1	Vitamin K epoxide reductase complex subunit 1-like protein 1 (VKORC1-like protein 1) (EC 1.17.4.4)				63826.8
MSH6	DNA mismatch repair protein Msh6 (hMSH6) (G/T mismatch-binding protein) (GTBP) (GTMBP) (MutS protein homolog 6) (MutS-alpha 160 kDa subunit) (p160)	402643	408570	367428	318769	406681	420918	425677	486530	472756
PSMD4	26S proteasome non-ATPase regulatory subunit 4 (26S proteasome regulatory subunit RPN10) (26S proteasome regulatory subunit S5A) (Antisecretory factor 1) (AF) (ASF) (Multiubiquitin chain-binding protein)	67537.5	50939.8	52610	103308	29678.1	60891.5	63221.2	48498.2	84408.7
RNPS1	RNA-binding protein with serine-rich domain 1 (SR-related protein LDC2)	105035	46639.1	47277.8		70889.5	61012.1	47706.9	42525.4	81651.4
EDC4	Enhancer of mRNA-decapping protein 4 (Autoantigen Ge-1) (Autoantigen RCD-8) (Human enhancer of decapping large subunit) (Hedls)	631771	710865	859897	901253	790041	1036900	1009210	1047950	1275360
ATAD5	ATPase family AAA domain-containing protein 5 (Chromosome fragility-associated gene 1 protein)	250696	354888	395829	137216	302093	288421	271189	407647	212735
CDC27	Cell division cycle 27 (Cell division cycle 27, isoform CRA_c)	123619	109457	113401	43090.7	102264	73364	47040.9	63491.4	58946.2
	Cell division cycle protein 27 homolog (Anaphase-promoting complex subunit 3) (APC3) (CDC27 homolog) (CDC27Hs) (H-NUC)	2077480	2047150	1889840	1397050	1679100	1491220	1530660	1319480	1327140
NUP88	#N/A	111039	109350	125228		127662	169633	144674	178490	93803.6
U2SURP	U2 snRNP-associated SURP motif-containing protein (140 kDa Ser/Arg-rich domain protein) (U2-associated protein SR140)	404267	362774	400227	478853	341344	482831	453638	397042	353893
EXOSC10	Exosome component 10 (EC 3.1.13.-) (Autoantigen PM/Scl 2) (P100 polymyositis-scleroderma overlap syndrome-associated autoantigen) (Polymyositis/scleroderma autoantigen 100 kDa) (PM/Scl-100) (Polymyositis/scleroderma autoantigen 2)	1032900	1430460	1451640	1175580	1409890	1245370	1179930	1003120	1103850
TFRC	Transferrin receptor protein 1 (TR) (TfR) (TfR1) (Trfr) (T9) (p90) (CD antigen CD71) [Cleaved into: Transferrin receptor protein 1, serum form (sTfR)]	133560	91353.8	67885.2	108242	70705.3	91255.4	80021.7	86102.1	65413.9
FH	Fumarate hydratase, mitochondrial (Fumarase) (HsFH) (EC 4.2.1.2)	81657.9	81724	91749.9	162349	101043	134151	158846	73645.7	87927.6
TOMM70	Mitochondrial import receptor subunit TOM70 (Mitochondrial precursor proteins import receptor) (Translocase of outer membrane 70 kDa subunit) (Translocase of outer mitochondrial membrane protein 70)	140969	163630	151075	128191	130279	218485	222329	187047	206059
MYBBP1A	Myb-binding protein 1A	3006640	3212560	3584940	2574660	1201360	3822450	3318900	3606230	3030190
PIGS	#N/A		180992	205270	154594	192253	169916	137326	113323	104583
DNTTIP1	#N/A					22263.1	25150.5	46298.2	12416.4
ARID1A	AT-rich interactive domain-containing protein 1A (ARID domain-containing protein 1A) (B120) (BRG1-associated factor 250) (BAF250) (BRG1-associated factor 250a) (BAF250A) (Osa homolog 1) (hOSA1) (SWI-like protein) (SWI/SNF complex protein p270) (SWI/SNF-related, matrix-associated, actin-dependent regulator of chromatin subfamily F member 1) (hELD)	529098	552234	562628	404650	501971	476838	494055	326212	382328
CKAP5	Cytoskeleton-associated protein 5 (Colonic and hepatic tumor overexpressed gene protein) (Ch-TOG)		94723.4	82171	453966	66753	92735.9	120690	87262.8	118422
STIP1	Stress-induced-phosphoprotein 1 (STI1) (Hsc70/Hsp90-organizing protein) (Hop) (Renal carcinoma antigen NY-REN-11) (Transformation-sensitive protein IEF SSP 3521)	224083	247910	208138	263284	201415	309043	272904	246807	271026
RBM39	RNA-binding protein 39 (CAPER alpha) (CAPERalpha) (Hepatocellular carcinoma protein 1) (RNA-binding motif protein 39) (RNA-binding region-containing protein 2) (Splicing factor HCC1)	2603240	2673160	2354890	1932780	2368180	2474100	2256810	2351860	2149710
RBM4B	RNA-binding protein 4B (RNA-binding motif protein 30) (RNA-binding motif protein 4B) (RNA-binding protein 30)	758174	749066	705776	985664	649227	658054	631229	613122	751145
CHCHD3	#N/A	15833		24849.2	38075.8	20147.3	15963.6	13279.3	26862.3
CNOT1	CCR4-NOT transcription complex subunit 1 (CCR4-associated factor 1) (Negative regulator of transcription subunit 1 homolog) (NOT1H) (hNOT1)	578504	520408	538372	612900	482265	599395	664761	645401	716069
KDM5A	Lysine-specific demethylase 5A (EC 1.14.11.67) (Histone demethylase JARID1A) (Jumonji/ARID domain-containing protein 1A) (Retinoblastoma-binding protein 2) (RBBP-2) ([histone H3]-trimethyl-L-lysine(4) demethylase 5A)	363378	999871	990310	708597	800320	611574	537815	586406	717448
RRM2	#N/A	96244.4	91331.2	87602.8		82401	131713	130734	125380	132333
MROH1	Maestro heat-like repeat-containing protein family member 1 (HEAT repeat-containing protein 7A)	46374.1		38529.6	43055.9	54032	43518.1	55917.6	70599.4	90423.4
TAF6	Transcription initiation factor TFIID subunit 6 (RNA polymerase II TBP-associated factor subunit E) (Transcription initiation factor TFIID 70 kDa subunit) (TAF(II)70) (TAFII-70) (TAFII70) (Transcription initiation factor TFIID 80 kDa subunit) (TAF(II)80) (TAFII-80) (TAFII80)	69512.3	83698.5	79849.1	52812.8	59684.5	52596.9	57131.4	47242.7	70495.3
DBN1	#N/A	23071.7	20184.2	32454.4	25862.5		15346.7	21266.8
NSD1	Histone-lysine N-methyltransferase, H3 lysine-36 specific (EC 2.1.1.357) (Androgen receptor coactivator 267 kDa protein) (Androgen receptor-associated protein of 267 kDa) (H3-K36-HMTase) (Lysine N-methyltransferase 3B) (Nuclear receptor-binding SET domain-containing protein 1) (NR-binding SET domain-containing protein)	156713	226585	191805	113132	212253	151467	184300	130607	132178
SEPTIN11	#N/A	100952	136573	123962	110307	127957	105498	118147	95488.3	129496
BTAF1	TATA-binding protein-associated factor 172 (EC 3.6.4.-) (ATP-dependent helicase BTAF1) (B-TFIID transcription factor-associated 170 kDa subunit) (TAF(II)170) (TBP-associated factor 172) (TAF-172)	85467.2	102502	103103	70225.6	109728	110959	133670	109488	89557.5
NAPRT	Nicotinate phosphoribosyltransferase (NAPRTase) (EC 6.3.4.21) (FHA-HIT-interacting protein) (Nicotinate phosphoribosyltransferase domain-containing protein 1)				507189
CPSF1	Cleavage and polyadenylation specificity factor subunit 1 (Cleavage and polyadenylation specificity factor 160 kDa subunit) (CPSF 160 kDa subunit)	762578	1133930	1277050	894659	1260750	1088570	921623	1089760	1024750
KDM1B	Lysine-specific histone demethylase 2 (EC 1.14.99.66) (Flavin-containing amine oxidase domain-containing protein 1) (Lysine-specific histone demethylase 1B)	39661.4	126211	119227	89664.6	124037	108854	121919	95116.3	96815.8
MED17	Mediator of RNA polymerase II transcription subunit 17 (Activator-recruited cofactor 77 kDa component) (ARC77) (Cofactor required for Sp1 transcriptional activation subunit 6) (CRSP complex subunit 6) (Mediator complex subunit 17) (Thyroid hormone receptor-associated protein complex 80 kDa component) (Trap80) (Transcriptional coactivator CRSP77) (Vitamin D3 receptor-interacting protein complex 80…	116546	157826	136900	94656.3	182910	158170	73172.2	173310	202069
MIOS	GATOR complex protein MIOS (Missing oocyte meiosis regulator homolog)	136574	120684	163402	120508	117693	184568	160199	200307	189758
IDH3B	#N/A		49046.1				61668.9	53286.5	53847.5	72555.4
INTS1	Integrator complex subunit 1 (Int1)	274224	296477	284970	226390	306517	289943	273940	287119	294829
COPG2	Coatomer subunit gamma-2 (Gamma-2-coat protein) (Gamma-2-COP)	224468	259939	267618	252919	265990	231629	311740	255139	338327
NAGLU	#N/A				59371.7
DIP2B	Disco-interacting protein 2 homolog B (DIP2 homolog B)	214644	334101	289749	324373	353149	327595	303992	361632	365910
PFKP	ATP-dependent 6-phosphofructokinase, platelet type (ATP-PFK) (PFK-P) (EC 2.7.1.11) (6-phosphofructokinase type C) (Phosphofructo-1-kinase isozyme C) (PFK-C) (Phosphohexokinase)	917947	886904	943881	1086570	1065780	653509	547618	951750	917857
UBE3A	Ubiquitin-protein ligase E3A (EC 2.3.2.26) (E6AP ubiquitin-protein ligase) (HECT-type ubiquitin transferase E3A) (Human papillomavirus E6-associated protein) (Oncogenic protein-associated protein E6-AP) (Renal carcinoma antigen NY-REN-54)	280485	254169	243708	281597	298976	257911	256958	268173	294942
NUMA1	Nuclear mitotic apparatus protein 1 (Nuclear matrix protein-22) (NMP-22) (Nuclear mitotic apparatus protein) (NuMA protein) (SP-H antigen)	630535	1.21911e+06	1.09665e+06	751303	805925	768490	809134	685115	570805
RBBP6	E3 ubiquitin-protein ligase RBBP6 (EC 2.3.2.27) (Proliferation potential-related protein) (Protein P2P-R) (RING-type E3 ubiquitin transferase RBBP6) (Retinoblastoma-binding Q protein 1) (RBQ-1) (Retinoblastoma-binding protein 6) (p53-associated cellular protein of testis)	237469	182626	227379	122344	229746	238495	183753	231441	226540
VPS52	#N/A	37377.7	55289.3	34678.3	51062.7	36170.9	49422.6	49359.9	69247	65782.6
STIM1	Stromal interaction molecule 1				97919
CSE1L	Exportin-2 (Exp2) (Cellular apoptosis susceptibility protein) (Chromosome segregation 1-like protein) (Importin-alpha re-exporter)	290456	344146	335561	407489	327690	449181	441534	331162	367757
ARID4A	AT-rich interactive domain-containing protein 4A (ARID domain-containing protein 4A) (Retinoblastoma-binding protein 1) (RBBP-1)	148531	6120990	7324870	4071400	5518850	3377210	3035640	2853180	3573220
CDC73	Parafibromin (Cell division cycle protein 73 homolog) (Hyperparathyroidism 2 protein)	797728	918920	845690	750472	886056	833572	826279	857707	893043
RNF213	E3 ubiquitin-protein ligase RNF213 (EC 2.3.2.27) (EC 3.6.4.-) (ALK lymphoma oligomerization partner on chromosome 17) (E3 ubiquitin-lipopolysaccharide ligase RNF213) (EC 2.3.2.-) (Mysterin) (RING finger protein 213)	699665	627524	579628	536227	773137	742828	719617	965031	1107710
VDAC3	Voltage-dependent anion-selective channel protein 3 (VDAC-3) (hVDAC3) (Outer mitochondrial membrane protein porin 3)	2273020	2490960	3236230	3158420	2659900	3359800	3929100	3720010	3476780
WIZ	Protein Wiz (Widely-interspaced zinc finger-containing protein) (Zinc finger protein 803)	209130	1346870	1191730	922263	906032	861542	692462	744008	891675
EIF2B5	Translation initiation factor eIF-2B subunit epsilon (eIF-2B GDP-GTP exchange factor subunit epsilon)	359397	367883	394716	267920	423083	402535	504717	516815	425760
PRPF3	U4/U6 small nuclear ribonucleoprotein Prp3 (Pre-mRNA-splicing factor 3) (hPrp3) (U4/U6 snRNP 90 kDa protein)	317363	342266	399780	295644	356502	342380	369267	356643	279549
SIN3A	Paired amphipathic helix protein Sin3a (Histone deacetylase complex subunit Sin3a) (Transcriptional corepressor Sin3a)	609023	1028150	987909	757365	849667	780253	716618	682620	791625
DDX54	ATP-dependent RNA helicase DDX54 (EC 3.6.4.13) (ATP-dependent RNA helicase DP97) (DEAD box RNA helicase 97 kDa) (DEAD box protein 54)	622253	691765	641837	506084	512950	666044	564506	592735	655598
BOD1L1	#N/A	300198	315855	184657	140070	325508	263834	246835	282354
YBX1	Y-box-binding protein 1 (YB-1) (CCAAT-binding transcription factor I subunit A) (CBF-A) (DNA-binding protein B) (DBPB) (Enhancer factor I subunit A) (EFI-A) (Nuclease-sensitive element-binding protein 1) (Y-box transcription factor)	342717	378914	421909	528511	382350	374468	355310	449206	341528
TOE1	Target of EGR1 protein 1			29583.9	62429.4	47052.9	34440.7			61984.5
KNOP1	Lysine-rich nucleolar protein 1 (Protein FAM191A) (Testis-specific gene 118 protein)	605194	390074	498683		511844	456868	312205	371435	422753
GCN1	Stalled ribosome sensor GCN1 (GCN1 eIF-2-alpha kinase activator homolog) (GCN1-like protein 1) (General control of amino-acid synthesis 1-like protein 1) (Translational activator GCN1) (HsGCN1)	161839	150236	163695	277231	146721	199714	224682	227420	205373
PRKRA	Interferon-inducible double-stranded RNA-dependent protein kinase activator A (PKR-associated protein X) (PKR-associating protein X) (Protein activator of the interferon-induced protein kinase) (Protein kinase, interferon-inducible double-stranded RNA-dependent activator)	19396.3			25301.5			18329.1
MAP1B	Microtubule-associated protein 1B (MAP-1B) [Cleaved into: MAP1B heavy chain; MAP1 light chain LC1]	238910	177669	127069	236788	130521	155375	174527	158062	156351
ERCC6L	#N/A		26496.3	16716	39119.9	52240.7	42993.7	38679.2	73256.8	71548.9
SPG7	#N/A				70454.3
NCKAP1	Nck-associated protein 1 (NAP 1) (Membrane-associated protein HEM-2) (p125Nap1)	224040	271242	283188	195740	298623	175310	257408	272178	318178
GTF2H3	General transcription factor IIH subunit 3 (Basic transcription factor 2 34 kDa subunit) (BTF2 p34) (General transcription factor IIH polypeptide 3) (TFIIH basal transcription factor complex p34 subunit)	183107	178793	157432	133248	183938	219849	221563	215681	173299
CLTA	#N/A		194609		163035		267783	320687	321159	297043
PPIL2	RING-type E3 ubiquitin-protein ligase PPIL2 (EC 2.3.2.27) (CYC4) (Cyclophilin-60) (Cyclophilin-like protein Cyp-60) (Cyp60) (hCyP-60) (Probable inactive peptidyl-prolyl cis-trans isomerase-like 2) (PPIase) (Rotamase PPIL2)	637517	616201	569038	906573	669846	624207	719260	623374	617127
DMAP1	DNA methyltransferase 1-associated protein 1 (DNMAP1) (DNMT1-associated protein 1)	413707	907180	929219	828066	933155	650986	610281	529932	560377
PRKCD	Protein kinase C delta type (EC 2.7.11.13) (Tyrosine-protein kinase PRKCD) (EC 2.7.10.2) (nPKC-delta) [Cleaved into: Protein kinase C delta type regulatory subunit; Protein kinase C delta type catalytic subunit (Sphingosine-dependent protein kinase-1) (SDK1)]	548957	441721	418260	523833	613778	559298	548398	670010	550963
MATR3	Matrin-3	2444260	2567410	2799060	2131920	2747540	2374790	2465480	2139870	2250470
INTS10	Integrator complex subunit 10 (Int10)	83385.5	152941	122592	113953	129632	161765	178121	101446	126232
POP1	Ribonucleases P/MRP protein subunit POP1 (hPOP1)	550560	644676	629462	449018	614990	604648	535009	507907	536192
XAB2	Pre-mRNA-splicing factor SYF1 (Protein HCNP) (XPA-binding protein 2)	155441	165564	156943	118842	177120	198106	187393	189915	175381
PRPF6	Pre-mRNA-processing factor 6 (Androgen receptor N-terminal domain-transactivating protein 1) (ANT-1) (PRP6 homolog) (U5 snRNP-associated 102 kDa protein) (U5-102 kDa protein)	387628	470440	431545	388362	450839	531724	560297	441948	499558
KIF5B	Kinesin-1 heavy chain (Conventional kinesin heavy chain) (Ubiquitous kinesin heavy chain) (UKHC)	296872	262629	238922	461973	217731	269632	277921	245257	264162
NEMF	Ribosome quality control complex subunit NEMF (Antigen NY-CO-1) (Nuclear export mediator factor) (Serologically defined colon cancer antigen 1)	239349	198639	190716	149018	171193	226478	249144	190316	221442
FASN	Fatty acid synthase (EC 2.3.1.85) (Type I fatty acid synthase) [Includes: [Acyl-carrier-protein] S-acetyltransferase (EC 2.3.1.38); [Acyl-carrier-protein] S-malonyltransferase (EC 2.3.1.39); 3-oxoacyl-[acyl-carrier-protein] synthase (EC 2.3.1.41); 3-oxoacyl-[acyl-carrier-protein] reductase (EC 1.1.1.100); 3-hydroxyacyl-[acyl-carrier-protein] dehydratase (EC 4.2.1.59); Enoyl-[acyl-carrier-protein]…	1250760	932285	915223	1853020	870982	1031410	983704	1073500	1087210
RAD18	E3 ubiquitin-protein ligase RAD18 (EC 2.3.2.27) (Postreplication repair protein RAD18) (hHR18) (hRAD18) (RING finger protein 73) (RING-type E3 ubiquitin transferase RAD18)		128441	167602	175871	139449	130598	114460	85326.8	93478.9
COPB2	Coatomer subunit beta' (Beta'-coat protein) (Beta'-COP) (p102)	2118630	2215620	2269600	2904100	2192480	2259900	2389830	2398650	2141650
POLR1E	DNA-directed RNA polymerase I subunit RPA49 (RNA polymerase I subunit A49) (DNA-directed RNA polymerase I subunit E) (RNA polymerase I-associated factor 1) (RNA polymerase I-associated factor 53)		44317.3	46123.3		47894.3	39664.9	55919.4		42489.5
NUB1	NEDD8 ultimate buster 1 (Negative regulator of ubiquitin-like proteins 1) (Renal carcinoma antigen NY-REN-18)	278325	147081	166472	133873	156617	237142	228516	385084	262041
ZCCHC8	#N/A	59110.7	40506.2	30406.3		47182.2		94464.3	57882.2	58600.1
FLII	Protein flightless-1 homolog	225276	225569	239051	148906	167542	228949	248065	231757	235250
AQR	RNA helicase aquarius (EC 3.6.4.13) (Intron-binding protein of 160 kDa) (IBP160)	1386870	1332310	1383590	1079560	1491330	1374530	1357170	1210680	1359690
CAD	CAD protein [Includes: Glutamine-dependent carbamoyl-phosphate synthase (EC 6.3.5.5); Aspartate carbamoyltransferase (EC 2.1.3.2); Dihydroorotase (EC 3.5.2.3)]	1808190	1712750	1930650	1657750	2032910	2258730	2391060	2491580	2514220
TRRAP	Transformation/transcription domain-associated protein (350/400 kDa PCAF-associated factor) (PAF350/400) (STAF40) (Tra1 homolog)	196054	959486	918087	569462	685573	525250	489833	430407	425460
YWHAE	14-3-3 protein epsilon (14-3-3E)	739555	518008	463126	976334	422695	529152	553528	500598	603497
LRBA	Lipopolysaccharide-responsive and beige-like anchor protein (Beige-like protein) (CDC4-like protein)	47138.9	73378.7	113054	63848.9	100997	109355	104202	119670	122321
KRT2	Keratin, type II cytoskeletal 2 epidermal (Cytokeratin-2e) (CK-2e) (Epithelial keratin-2e) (Keratin-2 epidermis) (Keratin-2e) (K2e) (Type-II keratin Kb2)	69346600	73584300	39621100	3525090000	65447200	66198500	69297000	102430000	171867000
SRRM2	Serine/arginine repetitive matrix protein 2 (300 kDa nuclear matrix antigen) (Serine/arginine-rich splicing factor-related nuclear matrix protein of 300 kDa) (SR-related nuclear matrix protein of 300 kDa) (Ser/Arg-related nuclear matrix protein of 300 kDa) (Splicing coactivator subunit SRm300) (Tax-responsive enhancer element-binding protein 803) (TaxREB803)	326544	275983	255887	172855	264252	315080	313637	320497	311372
SPEN	Msx2-interacting protein (SMART/HDAC1-associated repressor protein) (SPEN homolog)	135163	183204	168975	136365	190022	106485	153776	129586	177887
AARS2	#N/A		31218	60633.6		45510.6	44463.9	41038.7	65973	33716.7
SMC6	Structural maintenance of chromosomes protein 6 (SMC protein 6) (SMC-6) (hSMC6)	139485	552042	594121	424275	484682	1158960	988861	1057160	1282690
SCAF4	SR-related and CTD-associated factor 4 (CTD-binding SR-like protein RA4) (Splicing factor, arginine/serine-rich 15)	320601	342776	288851	224167	266940	383967	247151	346837	348305
RAI1	Retinoic acid-induced protein 1	201770	408939	283200	193277	328137	274482	247387	309195	261636
ALDH2	Aldehyde dehydrogenase, mitochondrial (EC 1.2.1.3) (ALDH class 2) (ALDH-E2) (ALDHI)	411383	451483	438724	462152	371024	571841	597285	466005	442189
IK	Protein Red (Cytokine IK) (IK factor) (Protein RER)	241101	247547	240593	256297	207590	332387	300813	226551	183568
MRTO4	mRNA turnover protein 4 homolog (Ribosome assembly factor MRTO4)	229647	302955	311794	159575	199026	313780	236073	256689	158507
SRM	Spermidine synthase (SPDSY) (EC 2.5.1.16) (Putrescine aminopropyltransferase)	606271	461230	469239	546392	500052	416438	436271	486237	432961
SMARCD2	SWI/SNF-related matrix-associated actin-dependent regulator of chromatin subfamily D member 2 (60 kDa BRG-1/Brm-associated factor subunit B) (BRG1-associated factor 60B) (BAF60B)	1342740	1918460	1749560	1565010	1844290	1597430	1488620	1584280	1714560
BAG6	Large proline-rich protein BAG6 (BAG family molecular chaperone regulator 6) (BCL2-associated athanogene 6) (BAG-6) (HLA-B-associated transcript 3) (Protein G3) (Protein Scythe)	113965	95964.5	137780	162263	143983	167104	160936	130891	189372
FARSB	Phenylalanine--tRNA ligase beta subunit (EC 6.1.1.20) (Phenylalanyl-tRNA synthetase beta subunit) (PheRS)	607637	836394	725333	668588	680725	790278	880263	809606	766379
MED12	Mediator of RNA polymerase II transcription subunit 12 (Activator-recruited cofactor 240 kDa component) (ARC240) (CAG repeat protein 45) (Mediator complex subunit 12) (OPA-containing protein) (Thyroid hormone receptor-associated protein complex 230 kDa component) (Trap230) (Trinucleotide repeat-containing gene 11 protein)	156626	183831	173926	147188	174123	193210	176877	161699	178431
DHX16	Pre-mRNA-splicing factor ATP-dependent RNA helicase DHX16 (EC 3.6.4.13) (ATP-dependent RNA helicase #3) (DEAH-box protein 16)	822280	814558	728831	657194	840980	795936	747237	819024	892769
DDX20	Probable ATP-dependent RNA helicase DDX20 (EC 3.6.1.15) (EC 3.6.4.13) (Component of gems 3) (DEAD box protein 20) (DEAD box protein DP 103) (Gemin-3)	373461	223999	191714		281021	346411	344038	320790	281631
GART	Trifunctional purine biosynthetic protein adenosine-3 [Includes: Phosphoribosylamine--glycine ligase (EC 6.3.4.13) (Glycinamide ribonucleotide synthetase) (GARS) (Phosphoribosylglycinamide synthetase); Phosphoribosylformylglycinamidine cyclo-ligase (EC 6.3.3.1) (AIR synthase) (AIRS) (Phosphoribosyl-aminoimidazole synthetase); Phosphoribosylglycinamide formyltransferase (EC 2.1.2.2) (5'-phosphorib…	266575	191064	276770	498536	214657	266876	292388	243507	232458
HSPA14	Heat shock 70 kDa protein 14 (HSP70-like protein 1) (Heat shock protein HSP60)	453106	303189	342785	541790	376025	357410	423916	420969	377374
DHX29	ATP-dependent RNA helicase DHX29 (EC 3.6.4.13) (DEAH box protein 29) (Nucleic acid helicase DDXx)	179482	169717	201774	289134	225733	250771	253650	265618	210548
RRP1	#N/A	58642.9	67479.7	56750.2		62903.6	63617.3	55503.1	73951.7	87765
LRRC47	Leucine-rich repeat-containing protein 47	171936	187773	134833	142637	176157	210280	222489	193255	197070
CDC5L	Cell division cycle 5-like protein (Cdc5-like protein) (Pombe cdc5-related protein)	1044160	1186100	1438080	1063010	1190390	1346700	1122090	946658	1148140
PRPF4B	Serine/threonine-protein kinase PRP4 homolog (EC 2.7.11.1) (PRP4 kinase) (PRP4 pre-mRNA-processing factor 4 homolog)	766616	572370	606845	581603	661390	597523	534533	525952	597880
RPL7A	Large ribosomal subunit protein eL8 (60S ribosomal protein L7a) (PLA-X polypeptide) (Surfeit locus protein 3)	2620830	3762140	3713330	2479340	3394840	4243190	4308050	4568070	3462290
SF3B1	Splicing factor 3B subunit 1 (Pre-mRNA-splicing factor SF3b 155 kDa subunit) (SF3b155) (Spliceosome-associated protein 155) (SAP 155)	648901	920699	892343	749750	834530	764157	785086	602591	607412
TARS2	Threonine--tRNA ligase, mitochondrial (EC 6.1.1.3) (Threonyl-tRNA synthetase) (ThrRS) (Threonyl-tRNA synthetase-like 1)	74670.6	67736.6	97133.4	103638	104321	94233.6	49035.3	87499.8	94821.9
MYO9B	Unconventional myosin-IXb (Unconventional myosin-9b)		57992.4	30574.4	33678		59184.4	53088.9	43193.5	105525
EP400	E1A-binding protein p400 (EC 3.6.4.-) (CAG repeat protein 32) (Domino homolog) (hDomino) (Trinucleotide repeat-containing gene 12 protein) (p400 kDa SWI2/SNF2-related protein)	370283	1633140	1531450	986179	1128680	875536	861307	776653	810727
FLNB	Filamin-B (FLN-B) (ABP-278) (ABP-280 homolog) (Actin-binding-like protein) (Beta-filamin) (Filamin homolog 1) (Fh1) (Filamin-3) (Thyroid autoantigen) (Truncated actin-binding protein) (Truncated ABP)	170118	160307	117790	1393400	110717	143444	150926	148974	152652
JAGN1	Protein jagunal homolog 1	36959	38520.2	54507.9	15171.1	44430.4	48946	27565.8	38645.4
HNRNPM	Heterogeneous nuclear ribonucleoprotein M (hnRNP M)	2082750	2617870	2371710	2417510	2395650	3352770	3037980	2345130	2013590
RUVBL2	RuvB-like 2 (EC 3.6.4.12) (48 kDa TATA box-binding protein-interacting protein) (48 kDa TBP-interacting protein) (51 kDa erythrocyte cytosolic protein) (ECP-51) (INO80 complex subunit J) (Repressing pontin 52) (Reptin 52) (TIP49b) (TIP60-associated protein 54-beta) (TAP54-beta)	1412800	2170360	2101330	1714160	1981880	1730250	1648910	1667740	1710060
MAP3K11	#N/A	896690	774193	695399	614910	731712	684648	486666	602614	909314
ZNF865	Zinc finger protein 865	243335	325418	260137	207712	273772	243427	211527	176466	233622
CHD2	Chromodomain-helicase-DNA-binding protein 2 (CHD-2) (EC 3.6.4.12) (ATP-dependent helicase CHD2)	812729	986716	1008700	657852	921978	850392	774914	776820	794630
AGK	Acylglycerol kinase, mitochondrial (hAGK) (EC 2.7.1.107) (EC 2.7.1.138) (EC 2.7.1.94) (Multiple substrate lipid kinase) (HsMuLK) (MuLK) (Multi-substrate lipid kinase)		40526.6	98479.6	61783.6	48692.8			87900.9	87493.4
MYO1B	Unconventional myosin-Ib (MYH-1c) (Myosin I alpha) (MMI-alpha) (MMIa)	65341.4	23914.6		335345	43750.5		46749.8	30461.1	46933.4
ZNF106	Zinc finger protein 106 (Zfp-106) (Zinc finger protein 474)	114225	4138340	3583350	2687600	3448050	4718040	4373860	3331770	3616610
SMU1	WD40 repeat-containing protein SMU1 (Smu-1 suppressor of mec-8 and unc-52 protein homolog) [Cleaved into: WD40 repeat-containing protein SMU1, N-terminally processed]	3459550	3549370	3546310	3791870	3649900	3437530	3032250	3375050	3057060
RBM14	RNA-binding protein 14 (Paraspeckle protein 2) (PSP2) (RNA-binding motif protein 14) (RRM-containing coactivator activator/modulator) (Synaptotagmin-interacting protein) (SYT-interacting protein)	1.38971e+07	1.34688e+07	1.32646e+07	1.03196e+07	1.39136e+07	1.08462e+07	1.08851e+07	1.0838e+07	1.05536e+07
EIF2B4	Translation initiation factor eIF-2B subunit delta (eIF-2B GDP-GTP exchange factor subunit delta)	177013	168240	157521	239474	162496	112083	196160	171906	217869
FUS	RNA-binding protein FUS (75 kDa DNA-pairing protein) (Oncogene FUS) (Oncogene TLS) (POMp75) (Translocated in liposarcoma protein)	189992000	152723000	137248000	122700000	143535000	98490800	102202000	90171300	83360000
TAF15	TATA-binding protein-associated factor 2N (68 kDa TATA-binding protein-associated factor) (TAF(II)68) (TAFII68) (RNA-binding protein 56)	4602460	3512520	3471620	2798460	3886610	3104980	3719350	2831670	2299720
EIF4G3	#N/A		65443.6	45571.5	100659	48706.7	32079.5	74645.1		78860
MYH14	Myosin-14 (Myosin heavy chain 14) (Myosin heavy chain, non-muscle IIc) (Non-muscle myosin heavy chain IIc) (NMHC II-C)	321961	186297	240678	269713	247649	229601	304306	254467	233398
RRBP1	Ribosome-binding protein 1 (180 kDa ribosome receptor homolog) (RRp) (ES/130-related protein) (Ribosome receptor protein)	88843.1	157061	262221	174031	145634	195141	217004	248658	200063
PRMT5	Protein arginine N-methyltransferase 5 (PRMT5) (EC 2.1.1.320) (72 kDa ICln-binding protein) (Histone-arginine N-methyltransferase PRMT5) (Jak-binding protein 1) (Shk1 kinase-binding protein 1 homolog) (SKB1 homolog) (SKB1Hs) [Cleaved into: Protein arginine N-methyltransferase 5, N-terminally processed]	643063	709221	689813	1349310	666930	770752	784473	698267	708906
RBM17	Splicing factor 45 (45 kDa-splicing factor) (RNA-binding motif protein 17)	163509	175764	131697	205668	193150	206449	172823	135035	176104
APOB	Apolipoprotein B-100 (Apo B-100) [Cleaved into: Apolipoprotein B-48 (Apo B-48)]	3204440	2230550	1863980	3220860	1746700	2064420	2045090	1760960	2058530
SCG3	Secretogranin-3 (Secretogranin III) (SgIII)	180548	143372	114365	265482	95613.4	146038	139693	90784.2	126689
EXOC3	#N/A	45886	45014.1	34164.6			39948.7	59172.6	42015.1
ITIH1	Inter-alpha-trypsin inhibitor heavy chain H1 (ITI heavy chain H1) (ITI-HC1) (Inter-alpha-inhibitor heavy chain 1) (Inter-alpha-trypsin inhibitor complex component III) (Serum-derived hyaluronan-associated protein) (SHAP)	1896590	1169420	1044830	1770580	1074910	1179200	1118500	1022730	983309
VPS35L	#N/A			44048.3			49762.7	55186.1	50756.4
SLC27A4	#N/A		30982	50559.2	145191	40545	50417.5	58332.2	103382	95641.8
VRK1	Serine/threonine-protein kinase VRK1 (EC 2.7.11.1) (Vaccinia-related kinase 1)	587383	622018	579483	512326	493750	661193	645846	536149	565005
ITPR1	Inositol 1,4,5-trisphosphate receptor type 1	62641.4	48862.9	30975.6	4018170	70686.8	50058.5	70989.9	82231.8	200229
	Inositol 1,4,5-trisphosphate receptor type 1 (IP3 receptor isoform 1) (IP3R 1) (InsP3R1) (Type 1 inositol 1,4,5-trisphosphate receptor) (Type 1 InsP3 receptor)	155910	220678	258631	206711	246022	249214	256950	292414	300407
EML4	Echinoderm microtubule-associated protein-like 4 (EMAP-4) (Restrictedly overexpressed proliferation-associated protein) (Ropp 120)	551096	466626	540295	559448	525593	547505	522935	543629	530809
EML3	Echinoderm microtubule-associated protein-like 3 (EMAP-3)	105614	166618	150663	161161	129467	148405	138246	165678	163497
INTS14	Integrator complex subunit 14 (von Willebrand factor A domain-containing protein 9)		26445.4	35850.7	59825.3	41467.5	45929.9	66100.2	39648.3	48592.1
CDK2	Cyclin-dependent kinase 2 (EC 2.7.11.22) (Cell division protein kinase 2) (p33 protein kinase)	218039	261868	292739	179792	278522	303917	345702	314983	335968
PLEC	Plectin (PCN) (PLTN) (Hemidesmosomal protein 1) (HD1) (Plectin-1)	652031	580270	548395	6275300	480286	525870	621673	555668	792458
WDR90	#N/A			102686		92021.8	99343.9	72615.8	92380.7
CRYBG1	#N/A				155739
ZNF598	#N/A	58658.4	78317.3	162251	23978	112616	92029.2	74473.6	107061	107003
PHKA2	Phosphorylase b kinase regulatory subunit alpha, liver isoform (Phosphorylase kinase alpha L subunit)			43027.7		29225.5	54376.1	43726.5	55475	40011.1
PHKA1	#N/A	522322		237424		233051
TBL3	Transducin beta-like protein 3 (WD repeat-containing protein SAZD)	4431890	5062130	4667140	4700840	4553550	3983330	3592510	3230910	3453360
CELF1	CUGBP Elav-like family member 1 (CELF-1) (50 kDa nuclear polyadenylated RNA-binding protein) (Bruno-like protein 2) (CUG triplet repeat RNA-binding protein 1) (CUG-BP1) (CUG-BP- and ETR-3-like factor 1) (Deadenylation factor CUG-BP) (Embryo deadenylation element-binding protein homolog) (EDEN-BP homolog) (RNA-binding protein BRUNOL-2)	712743	707613	533464	467071	812791	652058	577528	766046	729363
KRT19	Keratin 19	114897	151780	82255.8	5054670	148824	113181	124492	190995	387954
	Keratin, type I cytoskeletal 19 (Cytokeratin-19) (CK-19) (Keratin-19) (K19)	529420	438790	436735	441930	292749	437636	373408	291045	289580
SMARCC1	SWI/SNF complex subunit SMARCC1 (BRG1-associated factor 155) (BAF155) (SWI/SNF complex 155 kDa subunit) (SWI/SNF-related matrix-associated actin-dependent regulator of chromatin subfamily C member 1)	245313	555124	453951	421420	519512	466213	454279	446521	527410
TUBGCP3	Gamma-tubulin complex component 3 (GCP-3) (hGCP3) (Gamma-ring complex protein 104 kDa) (h104p) (hGrip104) (Spindle pole body protein Spc98 homolog) (hSpc98)		22925.1	53729.9		45423.6	46753.5	35938.4	50232.2	72224.3
HARS1	Histidine--tRNA ligase, cytoplasmic (EC 6.1.1.21) (Histidyl-tRNA synthetase) (HisRS)	242250	214264	166106	4153200	174201	160988	192692	185988	308515
XRN2	5'-3' exoribonuclease 2 (EC 3.1.13.-) (DHM1-like protein) (DHP protein)	813172	939915	1064440	797043	1008330	763003	758490	643789	642480
SYMPK	Symplekin	85027.7	238071	206964	194854	187069	248716	267289	251333	209644
SNRNP200	U5 small nuclear ribonucleoprotein 200 kDa helicase (EC 3.6.4.13) (Activating signal cointegrator 1 complex subunit 3-like 1) (BRR2 homolog) (U5 snRNP-specific 200 kDa protein) (U5-200KD)	4329610	5288220	5290560	4027960	5298780	4578460	4508040	4244680	4365790
SFSWAP	Splicing factor, suppressor of white-apricot homolog (Splicing factor, arginine/serine-rich 8) (Suppressor of white apricot protein homolog)	337963	233651	231946	120975	246127	205906	205580	197175	178597
DDX46	Probable ATP-dependent RNA helicase DDX46 (EC 3.6.4.13) (DEAD box protein 46) (PRP5 homolog)	632365	495111	498482	415248	481562	558445	539179	537243	536912
UMPS	Uridine 5'-monophosphate synthase (UMP synthase) [Includes: Orotate phosphoribosyltransferase (OPRT) (OPRTase) (EC 2.4.2.10); Orotidine 5'-phosphate decarboxylase (ODC) (OMPD) (EC 4.1.1.23) (OMPdecase)]	360793	327911	329460	498265	400058	413424	450662	429341	435138
FKBP8	Peptidyl-prolyl cis-trans isomerase FKBP8 (PPIase FKBP8) (EC 5.2.1.8) (38 kDa FK506-binding protein) (38 kDa FKBP) (FKBP-38) (hFKBP38) (FK506-binding protein 8) (FKBP-8) (FKBPR38) (Rotamase)	117141	158043	215314	77948.7	209921	254985	295466	300828	223081
DDX47	Probable ATP-dependent RNA helicase DDX47 (EC 3.6.4.13) (DEAD box protein 47)	1666270	1775140	1718760	1406470	1573850	1591500	1941140	1719730	1515330
MACF1	Microtubule-actin cross-linking factor 1, isoforms 1/2/3/4/5 (620 kDa actin-binding protein) (ABP620) (Actin cross-linking family protein 7) (Macrophin-1) (Trabeculin-alpha)	147830	184683	193958	175441	204945	170003	187191	128590	137005
RBM33	#N/A	33155.8				23988.2	55050.2	31802.4	38403.9	27584.8
SPTAN1	Spectrin alpha chain, non-erythrocytic 1 (Alpha-II spectrin) (Fodrin alpha chain) (Spectrin, non-erythroid alpha subunit)	164069	111435	105271	167104	77407.4	96077.3	99127.5	91922.2	98020.3
RPP30	Ribonuclease P protein subunit p30 (RNaseP protein p30) (RNase P subunit 2)	365276	328647	266074	314159	359937	366561	408716	338731	349104
EPRS1	Bifunctional glutamate/proline--tRNA ligase (Bifunctional aminoacyl-tRNA synthetase) (Cell proliferation-inducing gene 32 protein) (Glutamatyl-prolyl-tRNA synthetase) [Includes: Glutamate--tRNA ligase (EC 6.1.1.17) (Glutamyl-tRNA synthetase) (GluRS); Proline--tRNA ligase (EC 6.1.1.15) (Prolyl-tRNA synthetase)]	507314	481242	500033	967399	449864	565112	623471	649161	659437
RFC1	Replication factor C subunit 1 (Activator 1 140 kDa subunit) (A1 140 kDa subunit) (Activator 1 large subunit) (Activator 1 subunit 1) (DNA-binding protein PO-GA) (Replication factor C 140 kDa subunit) (RF-C 140 kDa subunit) (RFC140) (Replication factor C large subunit)	169420	278344	261898	191824	339510	289900	251562	197872	279839
ALDH16A1	Aldehyde dehydrogenase family 16 member A1		83344.8	76281.5	416643	83939.5	86341.5	83815	25696.1	64916.8
BCCIP	BRCA2 and CDKN1A-interacting protein (P21- and CDK-associated protein 1) (Protein TOK-1)	105338	122628	68478.2	56716.4	127968	144288	138493	152228	93283.9
POLR1A	DNA-directed RNA polymerase I subunit RPA1 (RNA polymerase I subunit A1) (EC 2.7.7.6) (A190) (DNA-directed RNA polymerase I largest subunit) (DNA-directed RNA polymerase I subunit A) (RNA polymerase I 194 kDa subunit) (RPA194)	104106	219479	195406	196764	284758	256231	232854	226228	267527
DHX34	Probable ATP-dependent RNA helicase DHX34 (EC 3.6.4.13) (DEAH box protein 34) (DExH-box helicase 34)	302029	239801	311359	301622	368108	241261	265608	258875	405207
KIF2A	Kinesin-like protein KIF2A (Kinesin-2) (hK2)	302106	330811	318468	281354	314903	330576	366107	331592	344267
RPS25	Small ribosomal subunit protein eS25 (40S ribosomal protein S25)	2373110	2288690	2399000	1852590	1844830	3207740	3243120	2725450	2907040
PRKDC	DNA-dependent protein kinase catalytic subunit (DNA-PK catalytic subunit) (DNA-PKcs) (EC 2.7.11.1) (DNPK1) (p460)	337577	258339	216412	312990	161562	203163	228817	190430	221405
AIFM1	Apoptosis-inducing factor 1, mitochondrial (EC 1.6.99.-) (Programmed cell death protein 8)	352846	336832	469159	388759	374007	411161	584590	566167	508894
EIF4G1	Eukaryotic translation initiation factor 4 gamma 1 (eIF-4-gamma 1) (eIF-4G 1) (eIF-4G1) (p220)	205812	252941	259887	232193	242355	309726	349710	300628	300865
VPS13D	#N/A	63150	104936					69425		75560.5
BPIFB2	BPI fold-containing family B member 2 (Bactericidal/permeability-increasing protein-like 1) (BPI-like 1) (Long palate, lung and nasal epithelium carcinoma-associated protein 2) (RYSR)	899544	579559	442903	1208900	393862	491748	523469	466128	517519
HADHB	Trifunctional enzyme subunit beta, mitochondrial (TP-beta) [Includes: 3-ketoacyl-CoA thiolase (EC 2.3.1.155) (EC 2.3.1.16) (Acetyl-CoA acyltransferase) (Beta-ketothiolase)]	1746820	1927530	1801790	1508780	1820610	1868070	2067270	2628690	2535710
YTHDC2	3'-5' RNA helicase YTHDC2 (EC 3.6.4.13) (YTH domain-containing protein 2) (hYTHDC2)	117551	155968	128576	124775	148546	167252	152650	127132	160001
TUBB6	Tubulin beta-6 chain (Tubulin beta class V)	110210	88018.7	110210	152397	119016	43567.3	175528	174610	182377
ALDH18A1	Delta-1-pyrroline-5-carboxylate synthase (P5CS) (Aldehyde dehydrogenase family 18 member A1) [Includes: Glutamate 5-kinase (GK) (EC 2.7.2.11) (Gamma-glutamyl kinase); Gamma-glutamyl phosphate reductase (GPR) (EC 1.2.1.41) (Glutamate-5-semialdehyde dehydrogenase) (Glutamyl-gamma-semialdehyde dehydrogenase)]	411457	385939	388522	379465	417959	369349	389722	458685	421726
CDC23	Cell division cycle protein 23 homolog (Anaphase-promoting complex subunit 8) (APC8) (Cyclosome subunit 8)		120585	100665		116714	119954	94476.1	142680	117712
UPF2	Regulator of nonsense transcripts 2 (Up-frameshift suppressor 2 homolog) (hUpf2)	107773	301658	289521	221457	330574	267250	272946	268566	238658
IMMT	MICOS complex subunit MIC60 (Cell proliferation-inducing gene 4/52 protein) (Mitochondrial inner membrane protein) (Mitofilin) (p87/89)	809307	887979	1080820	858923	883462	1165680	1254170	1291420	1187380
DHX9	ATP-dependent RNA helicase A (EC 3.6.4.13) (DEAH box protein 9) (DExH-box helicase 9) (Leukophysin) (LKP) (Nuclear DNA helicase II) (NDH II) (RNA helicase A)	30741500	26237800	26663600	21044400	23911900	26891900	25439900	20335100	20336600
CTNNB1	#N/A	249998	104502	98912.9	180926	37518.9	99614	146329	71501.8	133374
ICMT	Protein-S-isoprenylcysteine O-methyltransferase (EC 2.1.1.100) (Isoprenylcysteine carboxylmethyltransferase) (Prenylated protein carboxyl methyltransferase) (PPMT) (Prenylcysteine carboxyl methyltransferase) (pcCMT)	53208.9	119514	145429	74663	108281	120856	135274	133051	123938
JUP	Junction plakoglobin (Catenin gamma) (Desmoplakin III) (Desmoplakin-3)	2274890	2544620	1152550	86200300	1658390	1654080	2296840	1466020	6376120
AP2B1	AP-2 complex subunit beta (AP105B) (Adaptor protein complex AP-2 subunit beta) (Adaptor-related protein complex 2 subunit beta) (Beta-2-adaptin) (Beta-adaptin) (Clathrin assembly protein complex 2 beta large chain) (Plasma membrane adaptor HA2/AP2 adaptin beta subunit)	256662	241085	248040	352764	249281	318203	308984	296548	292364
TBCD	#N/A		47251.2	39974.3	73016.6	73015.4	73950.1	41331.9	49639.6	81487
NIPBL	Nipped-B-like protein (Delangin) (SCC2 homolog)	218043	324612	344428	311484	299484	341073	342803	289604	299857
ABCF1	ATP-binding cassette sub-family F member 1 (ATP-binding cassette 50) (TNF-alpha-stimulated ABC protein)	432569	293525	307570	570655	394372	417080	381549	405379	451685
RBM27	RNA-binding protein 27 (RNA-binding motif protein 27)	94455	76220.9	69818.4		64684.8	106800	89552.8	80385.8	74663.2
WIPI2	WD repeat domain phosphoinositide-interacting protein 2 (WIPI-2) (WIPI49-like protein 2)	225756	259147	243724	428657	195683	270231	198489	335069	272043
RECQL	ATP-dependent DNA helicase Q1 (EC 3.6.4.12) (DNA helicase, RecQ-like type 1) (RecQ1) (DNA-dependent ATPase Q1) (RecQ protein-like 1)	251067	226084	266188	211766	299462	309368	286198	325177	284063
POLE	DNA polymerase epsilon catalytic subunit A (EC 2.7.7.7) (3'-5' exodeoxyribonuclease) (EC 3.1.11.-) (DNA polymerase II subunit A)	267495	270944	277520	190136	332250	312381	263899	395970	409590
FTSJ3	pre-rRNA 2'-O-ribose RNA methyltransferase FTSJ3 (EC 2.1.1.-) (Protein ftsJ homolog 3) (Putative rRNA methyltransferase 3)	1122780	1239280	1109240	621726	996986	980029	736762	790965	756228
CDK9	Cyclin-dependent kinase 9 (EC 2.7.11.22) (EC 2.7.11.23) (C-2K) (Cell division cycle 2-like protein kinase 4) (Cell division protein kinase 9) (Serine/threonine-protein kinase PITALRE) (Tat-associated kinase complex catalytic subunit)	114856	204016	193896	178146	206188	260706	298354	214388	281518
LPCAT1	Lysophosphatidylcholine acyltransferase 1 (LPC acyltransferase 1) (LPCAT-1) (LysoPC acyltransferase 1) (EC 2.3.1.23) (1-acylglycerol-3-phosphate O-acyltransferase) (EC 2.3.1.51) (1-acylglycerophosphocholine O-acyltransferase) (1-alkenylglycerophosphocholine O-acyltransferase) (EC 2.3.1.25) (1-alkylglycerophosphocholine O-acetyltransferase) (EC 2.3.1.67) (Acetyl-CoA:lyso-platelet-activating factor…	178973	218956	131548	127937	153859	205715	200976	184365	201817
ACIN1	#N/A	132600	155806	208123	131933	137606	231428	161916	159187	146101
DDX27	Probable ATP-dependent RNA helicase DDX27 (EC 3.6.4.13) (DEAD box protein 27)	2949940	4108990	3648090	2619450	3543430	3702910	3376010	3107730	2988590
NIBAN2	#N/A		19580.2	20681.8	47166.2		24705.9
RNF25	#N/A		193434	212374		222987	254983	260013	281867
NONO	Non-POU domain-containing octamer-binding protein (NonO protein) (54 kDa nuclear RNA- and DNA-binding protein) (p54(nrb)) (p54nrb) (55 kDa nuclear protein) (NMT55) (DNA-binding p52/p100 complex, 52 kDa subunit)	16046400	14780800	15088800	12342700	15588400	15651400	15978600	16468000	15206600
NUP214	Nuclear pore complex protein Nup214 (214 kDa nucleoporin) (Nucleoporin Nup214) (Protein CAN)	205306	300234	399074	261512	303263	327155	346940	350220	352395
QSOX1	Sulfhydryl oxidase 1 (hQSOX) (EC 1.8.3.2) (Quiescin Q6)	380903	259054	268995	5341300	217424	241679	291537	306575	311029
PDK3	[Pyruvate dehydrogenase (acetyl-transferring)] kinase isozyme 3, mitochondrial (EC 2.7.11.2) (Pyruvate dehydrogenase kinase isoform 3)	60789.9	81183.1	50943.4	48240.6	43355.5	69575.3	67648.1	106177	81821.8
ZNF592	Zinc finger protein 592	129101	496269	518388	334042	487241	283997	243022	276872	297130
MEPCE	7SK snRNA methylphosphate capping enzyme (MePCE) (EC 2.1.1.-) (Bicoid-interacting protein 3 homolog) (Bin3 homolog)	22459.9	59566.1	45627.2		66156.7	35918.7	60255.1	20671.8	53304.6
SCAF1	Splicing factor, arginine/serine-rich 19 (SR-related C-terminal domain-associated factor 1) (SR-related and CTD-associated factor 1) (SR-related-CTD-associated factor) (SCAF) (Serine arginine-rich pre-mRNA splicing factor SR-A1) (SR-A1)	346789	207548	158972	73763.1	192485	168289	152959	159700	157439
MYO1E	Unconventional myosin-Ie (Myosin-Ic) (Unconventional myosin 1E)	298189	364029	448036	338270	343246	335240	367498	413174	302048
UBR4	E3 ubiquitin-protein ligase UBR4 (EC 2.3.2.27) (600 kDa retinoblastoma protein-associated factor) (N-recognin-4) (RING-type E3 ubiquitin transferase UBR4) (Retinoblastoma-associated factor of 600 kDa) (RBAF600) (p600) (Zinc finger UBR1-type protein 1)	242448	207908	255222	202930	240644	262712	252699	314779	339801
FOXP1	Forkhead box protein P1 (Mac-1-regulated forkhead) (MFH)		397529	299193	369731	357350	395771	498236	226600	250258
IGLC2;IGLC3	Immunoglobulin lambda constant 2 (Ig lambda chain C region Kern) (Ig lambda chain C region NIG-64) (Ig lambda chain C region SH) (Ig lambda chain C region X) (Ig lambda-2 chain C region)	8141550	6208290	5509450	6511660	4401090	5461090	5947230	5207490	5764130
SF3B2	Splicing factor 3B subunit 2 (Pre-mRNA-splicing factor SF3b 145 kDa subunit) (SF3b145) (Spliceosome-associated protein 145) (SAP 145)	190147	574662	520138	439608	566413	415307	416623	303487	372616
SON	Protein SON (Bax antagonist selected in saccharomyces 1) (BASS1) (Negative regulatory element-binding protein) (NRE-binding protein) (Protein DBP-5) (SON3)	3345070	4079480	3561140	2429060	3402570	3433800	3224200	2781030	2928210
DIDO1	Death-inducer obliterator 1 (DIO-1) (hDido1) (Death-associated transcription factor 1) (DATF-1)	420499	395521	423992	600073	403245	329306	301923	350331	362335
TRA2B	Transformer-2 protein homolog beta (TRA-2 beta) (TRA2-beta) (hTRA2-beta) (Splicing factor, arginine/serine-rich 10) (Transformer-2 protein homolog B)	7017590	5040800	6417000	5586300	6409120	5585320	5071660	5078600	4813400
DNAJC2	#N/A		49227.6	48408.1		17953	62088	24593.5	26941.6	41914.1
B4GALT7	Beta-1,4-galactosyltransferase 7 (Beta-1,4-GalTase 7) (Beta4Gal-T7) (b4Gal-T7) (EC 2.4.1.-) (Proteoglycan UDP-galactose:beta-xylose beta1,4-galactosyltransferase I) (UDP-Gal:beta-GlcNAc beta-1,4-galactosyltransferase 7) (UDP-galactose:beta-N-acetylglucosamine beta-1,4-galactosyltransferase 7) (UDP-galactose:beta-xylose beta-1,4-galactosyltransferase) (XGPT) (XGalT-1) (Xylosylprotein 4-beta-galact…		53084.4	46756.9	27962	40840.2	41103.2	33789.2		33829.8
NCLN	BOS complex subunit NCLN (Nicalin) (Nicastrin-like protein)	218249	192046	191213	418924	207921	267029	326218	266193	290187
CSNK1A1	Casein kinase I isoform alpha (CKI-alpha) (EC 2.7.11.1) (CK1)	481281	531557	546549	611213	526567	517340	470590	555234	549159
PBRM1	Protein polybromo-1 (hPB1) (BRG1-associated factor 180) (BAF180) (Polybromo-1D)	489878	4210700	3266480	2315440	4465410	1716400	1589110	1714050	1889740
FRYL	#N/A					14906.2			31884.7	38209.6
AGPS	Alkyldihydroxyacetonephosphate synthase, peroxisomal (Alkyl-DHAP synthase) (EC 2.5.1.26) (Aging-associated gene 5 protein) (Alkylglycerone-phosphate synthase)	92443.8	140612	134535	133079	153504	157555	191364	163731	120511
MACROH2A1	Core histone macro-H2A.1 (Histone macroH2A1) (mH2A1) (Histone H2A.y) (H2A/y) (Medulloblastoma antigen MU-MB-50.205)	4138770	5636690	5746800	3920530	4746790	5507930	5407740	5459240	4652510
RALY	RNA-binding protein Raly (Autoantigen p542) (Heterogeneous nuclear ribonucleoprotein C-like 2) (hnRNP core protein C-like 2) (hnRNP associated with lethal yellow protein homolog)	3530270	4682990	4551000	3201290	4268070	3780280	3728200	4069850	3374450
POLD1	DNA polymerase delta catalytic subunit (EC 2.7.7.7) (3'-5' exodeoxyribonuclease) (EC 3.1.11.-) (DNA polymerase subunit delta p125)	1287640	1213710	1115920	1024970	1234350	1295110	1167160	1411070	1288340
KANSL1	KAT8 regulatory NSL complex subunit 1 (MLL1/MLL complex subunit KANSL1) (MSL1 homolog 1) (hMSL1v1) (NSL complex protein NSL1) (Non-specific lethal 1 homolog)	18489.2		35418.2		57722.8	40574.1	36560.2	36533.8	43989.5
KDM4B	Lysine-specific demethylase 4B (EC 1.14.11.66) (JmjC domain-containing histone demethylation protein 3B) (Jumonji domain-containing protein 2B) ([histone H3]-trimethyl-L-lysine(9) demethylase 4B)	582462	535731	568632	522021	726656	405527	407946	653341	495195
C7	Complement component C7	943268	571489	428476	579596	429085	523814	461606	428796	456172
ZNF646	Zinc finger protein 646		1529800	1490350	851827	1027610	710569	621215	533715	543889
VARS1	Valine--tRNA ligase (EC 6.1.1.9) (Protein G7a) (Valyl-tRNA synthetase) (ValRS)	368012	443098	511296	702300	521771	548350	561203	506793	507673
GEMIN5	Gem-associated protein 5 (Gemin5)	212417	218377	262089	174918	198288	288157	284325	348383	326563
EIF4B	#N/A	130061	61329.1	81298.1		48695.3	90160.5	86043.8	79764.7	102277
SUPT16H	FACT complex subunit SPT16 (Chromatin-specific transcription elongation factor 140 kDa subunit) (FACT 140 kDa subunit) (FACTp140) (Facilitates chromatin transcription complex subunit SPT16) (hSPT16)	1172010	1336390	1391420	1155400	1380600	1460570	1390800	1411640	1488410
GBF1	#N/A	134418	122338	163550		150964	151730	164419	171394	175118
KAT14	Cysteine-rich protein 2-binding protein (CSRP2-binding protein) (ADA2A-containing complex subunit 2) (ATAC2) (CRP2-binding partner) (CRP2BP) (Lysine acetyltransferase 14)	160743	1371260	1285720	1002080	1296510	823443	812003	835251	889944
	Cysteine-rich protein 2-binding protein (Lysine acetyltransferase 14)	1338410	1212570	1145110	897126	1078240	1142470	1073560	959870	1235080
MBOAT7	Lysophospholipid acyltransferase 7 (LPLAT 7) (EC 2.3.1.-) (1-acylglycerophosphatidylinositol O-acyltransferase) (Bladder and breast carcinoma-overexpressed gene 1 protein) (Leukocyte receptor cluster member 4) (Lysophosphatidylinositol acyltransferase) (LPIAT) (Lyso-PI acyltransferase) (Membrane-bound O-acyltransferase domain-containing protein 7) (O-acyltransferase domain-containing protein 7) (…	183569	296098	452046	452516	320728	263494	142544	194290	294585
DBT	Lipoamide acyltransferase component of branched-chain alpha-keto acid dehydrogenase complex, mitochondrial (EC 2.3.1.168) (52 kDa mitochondrial autoantigen of primary biliary cirrhosis) (Branched chain 2-oxo-acid dehydrogenase complex component E2) (BCOADC-E2) (Branched-chain alpha-keto acid dehydrogenase complex component E2) (BCKAD-E2) (BCKADE2) (Dihydrolipoamide acetyltransferase component of …	236742	302798	386406	337117	318073	340549	467065	471224	417595
SRRM1	Serine/arginine repetitive matrix protein 1 (SR-related nuclear matrix protein of 160 kDa) (SRm160) (Ser/Arg-related nuclear matrix protein)	83529.5	59670.1	61890.9	34974.5	61507.5	69968.6	75308.5	69806.4	83979
PKP3	Plakophilin-3	128635	91463.9	71790.8	433934	53742.7	101444	105947	81592.9	83676.8
UBR5	E3 ubiquitin-protein ligase UBR5 (EC 2.3.2.26) (E3 ubiquitin-protein ligase, HECT domain-containing 1) (HECT-type E3 ubiquitin transferase UBR5) (Hyperplastic discs protein homolog) (hHYD) (Progestin-induced protein)	241596	259242	193917	250138	270893	291776	296637	340852	351879
VPS16	Vacuolar protein sorting-associated protein 16 homolog (hVPS16)	238417	256332	288415	210913	312126	317762	353249	387638	384287
BRD4	#N/A					27696.2	26539.1	22998.3
SGPL1	Sphingosine-1-phosphate lyase 1 (S1PL) (SP-lyase 1) (SPL 1) (hSPL) (EC 4.1.2.27) (Sphingosine-1-phosphate aldolase)	481915	426881	505038	471085	445372	569425	527850	494551	465175
STRAP	Serine-threonine kinase receptor-associated protein (MAP activator with WD repeats) (UNR-interacting protein) (WD-40 repeat protein PT-WD)	277704	284983	294000	417873	274648	268591	314800	337363	409422
SLC25A11	Mitochondrial 2-oxoglutarate/malate carrier protein (OGCP) (alpha-oxoglutarate carrier) (Solute carrier family 25 member 11) (SLC25A11)	475269	505559	637071	520408	458727	461877	440141	605113	510390
SAP130	Histone deacetylase complex subunit SAP130 (130 kDa Sin3-associated polypeptide) (Sin3-associated polypeptide p130)		285132	357512	262654	297104	175341	142344	133959	170865
OGT	UDP-N-acetylglucosamine--peptide N-acetylglucosaminyltransferase 110 kDa subunit (EC 2.4.1.255) (O-GlcNAc transferase subunit p110) (O-linked N-acetylglucosamine transferase 110 kDa subunit) (OGT)	265231	289096	302607	220234	342414	371769	380884	327602	330986
IFT56	#N/A	626271	615846	580116	165036	262472	748591	764350	789333	756080
MYO5A	Unconventional myosin-Va (Dilute myosin heavy chain, non-muscle) (Myosin heavy chain 12) (Myosin-12) (Myoxin)	212696	307484	376998	241877	318062	329177	418434	418188	407994
SMC1A	Structural maintenance of chromosomes protein 1A (SMC protein 1A) (SMC-1-alpha) (SMC-1A) (Sb1.8)	946636	1524990	1344630	1137820	1385050	1159940	1084190	1045080	1202760
TNRC18	#N/A	490661	560752	587551	485028	433463	467432	450887	478058	374158
DNAJC7	DnaJ homolog subfamily C member 7 (Tetratricopeptide repeat protein 2) (TPR repeat protein 2)	111731	203416	171886	223744	203085	235874	241038	257399	288481
BYSL	Bystin	120153	118735	153899	118386	97229.2	151555	121797	118422	121080
YEATS2	YEATS domain-containing protein 2	96979.2	1877660	1765930	1136730	1374730	1220740	1128330	1175420	1179980
DYNC1H1	Cytoplasmic dynein 1 heavy chain 1 (Cytoplasmic dynein heavy chain 1) (Dynein heavy chain, cytosolic)	701706	654172	685953	806331	632746	766310	726840	779178	830711
RREB1	Ras-responsive element-binding protein 1 (RREB-1) (Finger protein in nuclear bodies) (Raf-responsive zinc finger protein LZ321) (Zinc finger motif enhancer-binding protein 1) (Zep-1)	144960	382140	535919	265192	316693	235376	266547	240252	320235
RIF1	Telomere-associated protein RIF1 (Rap1-interacting factor 1 homolog)	53868.3	158166	181221	102229	117581	108520	108097	93011.4	78226.2
HACD2	Very-long-chain (3R)-3-hydroxyacyl-CoA dehydratase 2 (EC 4.2.1.134) (3-hydroxyacyl-CoA dehydratase 2) (HACD2) (Protein-tyrosine phosphatase-like member B)	99814.4	174095	221851	343849	146567	196491	209569	69904	112445
UBA1	Ubiquitin-like modifier-activating enzyme 1 (EC 6.2.1.45) (Protein A1S9) (Ubiquitin-activating enzyme E1)	438313	661770	594374	660210	542158	766045	796043	573239	676828
ZC3H11A	Zinc finger CCCH domain-containing protein 11A	165002	286667	350011	313950	383739	348470	360875	336684	354735
ETFA	Electron transfer flavoprotein subunit alpha, mitochondrial (Alpha-ETF)	236227	280683	250997	221388	212973	365183	306232	365654	300225
OSBPL5	#N/A	44099.9	38948.6	52277.8	40940.5	37523	71283.3	57535.6	60699.9	61641.6
TRAF4	TNF receptor-associated factor 4 (EC 2.3.2.27) (Cysteine-rich domain associated with RING and Traf domains protein 1) (Metastatic lymph node gene 62 protein) (MLN 62) (RING finger protein 83)	54376		51020.8	19081.4		58178.4	54711.9	75645.8	60909.2
KPNB1	Importin subunit beta-1 (Importin-90) (Karyopherin subunit beta-1) (Nuclear factor p97) (Pore targeting complex 97 kDa subunit) (PTAC97)	404328	405280	387473	507028	342209	434519	400733	339943	365203
PSMD1	26S proteasome non-ATPase regulatory subunit 1 (26S proteasome regulatory subunit RPN2) (26S proteasome regulatory subunit S1) (26S proteasome subunit p112)	302322	254947	293000	258450	267487	308093	310765	336081	325709
EWSR1	RNA-binding protein EWS (EWS oncogene) (Ewing sarcoma breakpoint region 1 protein)	72874500	63152400	55231200	39935800	56361300	47994700	49544200	42938400	35062900
MKI67	Proliferation marker protein Ki-67 (Antigen identified by monoclonal antibody Ki-67) (Antigen KI-67) (Antigen Ki67)	1016490	1648280	1564100	1462710	1485820	1198200	1189000	996463	941815
PDS5A	Sister chromatid cohesion protein PDS5 homolog A (Cell proliferation-inducing gene 54 protein) (Sister chromatid cohesion protein 112) (SCC-112)		315726	379833	398815	289770	564623	438894	234460	510274
DDX21	Nucleolar RNA helicase 2 (EC 3.6.4.13) (DEAD box protein 21) (Gu-alpha) (Nucleolar RNA helicase Gu) (Nucleolar RNA helicase II) (RH II/Gu)	13631200	14302100	14159600	10133700	13078400	12912600	12295700	11544100	12155900
EPPK1	Epiplakin (450 kDa epidermal antigen)			24363.5	4077550					85420.9
	#N/A			68091.6		70426.7			91217.5	115738
SUDS3	Sin3 histone deacetylase corepressor complex component SDS3 (45 kDa Sin3-associated polypeptide) (Suppressor of defective silencing 3 protein homolog)	337174	311055	393529	353149	397683	338504	293956	331016	346935
INTS5	#N/A	126966	127692	118551	82114	95114.4	145714	86044.6	113905	138245
ALAD	Delta-aminolevulinic acid dehydratase (ALADH) (EC 4.2.1.24) (Porphobilinogen synthase)	59201.5	111958		891831			102453		115876
DDX10	Probable ATP-dependent RNA helicase DDX10 (EC 3.6.4.13) (DEAD box protein 10)	281924	322058	320166	238018	266722	297150	293234	265423	254730
ADH7	All-trans-retinol dehydrogenase [NAD(+)] ADH7 (EC 1.1.1.105) (Alcohol dehydrogenase class 4 mu/sigma chain) (EC 1.1.1.1) (Alcohol dehydrogenase class IV mu/sigma chain) (Gastric alcohol dehydrogenase) (Omega-hydroxydecanoate dehydrogenase ADH7) (EC 1.1.1.66) (Retinol dehydrogenase)	98525.9	99084.6	116859	741868	113428	135662	118232	130158	115095
ATP1A1	Sodium/potassium-transporting ATPase subunit alpha-1 (Na(+)/K(+) ATPase alpha-1 subunit) (EC 7.2.2.13) (Sodium pump subunit alpha-1)	193361	202425	204450	242365	171224	192859	176297	164661	192165
SLC25A1	Tricarboxylate transport protein, mitochondrial (Citrate transport protein) (CTP) (Mitochondrial citrate carrier) (CIC) (Solute carrier family 25 member 1) (Tricarboxylate carrier protein)	369255	362758	399621	384475	367472	368308	442362	498167	457249
STK19	#N/A		102193	50790.6		61737.1	106635	76683.5	101905	84286.4
EBP	#N/A	89048.9		190567	1710080				193716	274910
ADD1	Alpha-adducin (Erythrocyte adducin subunit alpha)	152683	138144	141784	136652	127590	163757	209135	149735	179086
LIG3	DNA ligase 3 (EC 6.5.1.1) (DNA ligase III) (Polydeoxyribonucleotide synthase [ATP] 3)	400584	288858	293749	290642	340086	333696	319019	307476	334650
C3	Complement C3 (C3 and PZP-like alpha-2-macroglobulin domain-containing protein 1) [Cleaved into: Complement C3 beta chain; C3-beta-c (C3bc); Complement C3 alpha chain; C3a anaphylatoxin; Acylation stimulating protein (ASP) (C3adesArg); Complement C3b alpha' chain; Complement C3c alpha' chain fragment 1; Complement C3dg fragment; Complement C3g fragment; Complement C3d fragment; Complement C3f fra…	10200100	7115890	6185040	10844100	6159980	6768450	6492010	5640440	6900010
THUMPD3	#N/A		75764.4	74696.1		76731.9	107991		118137	92539.4
ATRX	Transcriptional regulator ATRX (EC 3.6.4.12) (ATP-dependent helicase ATRX) (X-linked helicase II) (X-linked nuclear protein) (XNP) (Znf-HX)	164097	675805	731874	647440	683178	863941	784955	918526	977985
NAV1	#N/A	1164310	1007700	1021290	765548	1013450	879286	951013	875955	881637
FLOT1	Flotillin-1	76839.1	52999.8	42873	56206.9	45726.7	58783	52566.1	76050	89929.6
LMNA	Prelamin-A/C [Cleaved into: Lamin-A/C (70 kDa lamin) (Renal carcinoma antigen NY-REN-32)]	324079	238233	187715	708404	168739	217335	201581	193858	258206
SLC25A5	ADP/ATP translocase 2 (ADP,ATP carrier protein 2) (ADP,ATP carrier protein, fibroblast isoform) (Adenine nucleotide translocator 2) (ANT 2) (Solute carrier family 25 member 5) [Cleaved into: ADP/ATP translocase 2, N-terminally processed]	20885900	22121000	32611000	29864900	24843300	22848200	25764100	33120100	22663800
SLC25A6	ADP/ATP translocase 3 (ADP,ATP carrier protein 3) (ADP,ATP carrier protein, isoform T2) (ANT 2) (Adenine nucleotide translocator 3) (ANT 3) (Solute carrier family 25 member 6) [Cleaved into: ADP/ATP translocase 3, N-terminally processed]	188434	51181.1	38462.5	35127.4	45001.3	58961.2	26837.7	37720.8	73682.1
NDUFV1	NADH dehydrogenase [ubiquinone] flavoprotein 1, mitochondrial (EC 7.1.1.2) (Complex I-51kD) (CI-51kD) (NADH dehydrogenase flavoprotein 1) (NADH-ubiquinone oxidoreductase 51 kDa subunit)	458728	562759	706111	599903	503282	642313	779596	853693	729569
UBTF	Nucleolar transcription factor 1 (Autoantigen NOR-90) (Upstream-binding factor 1) (UBF-1)	517686	860419	813306	896277	759758	1172230	1209300	527510	713141
CHD3	Chromodomain-helicase-DNA-binding protein 3 (CHD-3) (EC 3.6.4.12) (ATP-dependent helicase CHD3) (Mi-2 autoantigen 240 kDa protein) (Mi2-alpha) (Zinc finger helicase) (hZFH)	71107.6	149490	132190	270428	117613	184948	164683	134952	151532
CHD4	Chromodomain-helicase-DNA-binding protein 4 (CHD-4) (EC 3.6.4.12) (ATP-dependent helicase CHD4) (Mi-2 autoantigen 218 kDa protein) (Mi2-beta)	1226400	2868060	2763280	2174270	2573610	2206310	2184650	1796490	1908270
ANXA1	Annexin A1 (Annexin I) (Annexin-1) (Calpactin II) (Calpactin-2) (Chromobindin-9) (Lipocortin I) (Phospholipase A2 inhibitory protein) (p35) [Cleaved into: Annexin Ac2-26]	2524900	1637520	1430360	2378810	1245040	1512160	1492890	1294700	1508690
PFKM	#N/A				202478	276253
RARS1	Arginine--tRNA ligase, cytoplasmic (EC 6.1.1.19) (Arginyl-tRNA synthetase) (ArgRS)	307621	294647	312016	397433	346477	360113	396400	404946	394189
SEC23IP	#N/A	39930.1		62421.8	77172.4	61241.1	69575.8	104193	52875.3	51472.9
PABPC1	Polyadenylate-binding protein 1 (PABP-1) (Poly(A)-binding protein 1)	1515850	1368240	1457990	1612390	1345690	1848860	1990830	1825560	1868880
DDX41	Probable ATP-dependent RNA helicase DDX41 (EC 3.6.4.13) (DEAD box protein 41) (DEAD box protein abstrakt homolog)	34274.6	143979	144527	116526	154460	179243	246669	187502	191188
DNMT1	DNA (cytosine-5)-methyltransferase 1 (Dnmt1) (EC 2.1.1.37) (CXXC-type zinc finger protein 9) (DNA methyltransferase HsaI) (DNA MTase HsaI) (M.HsaI) (MCMT)	6071340	9214620	8808050	7370480	7913450	7273190	6559640	5145370	6137690
RPS3A	Small ribosomal subunit protein eS1 (40S ribosomal protein S3a) (v-fos transformation effector protein) (Fte-1)	2504230	2114220	2149860	2003040	1866480	2962680	2812320	2925030	3023870
GNL3L	Guanine nucleotide-binding protein-like 3-like protein	126171	160863	139498	137643	122646	179628	168393	178463	205371
UCKL1	#N/A	44868.3	73678.5	60963.9		42035.9	70654.6	59253.8	43718.3	54347.7
SACS	#N/A	47919.3	159243	412730	1308100	1201380	62823.1		13462.1	215224
ERLIN2	Erlin-2 (Endoplasmic reticulum lipid raft-associated protein 2) (Stomatin-prohibitin-flotillin-HflC/K domain-containing protein 2) (SPFH domain-containing protein 2)	417240	420312	430027	705492	363268	412007	535310	533231	540459
DYNC1I2	Cytoplasmic dynein 1 intermediate chain 2 (Cytoplasmic dynein intermediate chain 2) (Dynein intermediate chain 2, cytosolic) (DH IC-2)	287094	302527	292510	535738	329478	318583	363901	417642	523301
ECT2	Protein ECT2 (Epithelial cell-transforming sequence 2 oncogene)	137191	133772	113623	105570	133044	161858	126550	155761	120047
MBD4	Methyl-CpG-binding domain protein 4 (EC 3.2.2.-) (Methyl-CpG-binding endonuclease 1) (Methyl-CpG-binding protein MBD4) (Mismatch-specific DNA N-glycosylase)		36558	64270.8		42295.7		46304.2
ERLIN1	#N/A	31127.2	24107.3	33838.8	32248.2	28473	34275.1	42267.5	39262.1	36924.8
ELAC2	#N/A	62062.7	54611.8	44718.6	28322	61991.9	53257	62113.2	50409	52258.4
AHSA1	Activator of 90 kDa heat shock protein ATPase homolog 1 (AHA1) (p38)	505261	513393	455541	635715	503631	568692	564754	615931	574201
TUFM	Elongation factor Tu, mitochondrial (EF-Tu) (P43)	942092	996731	948443	1326030	909021	916861	1054240	1229980	1187790
SYNE2	#N/A		223965	79919	5734730	161668	113480	186476	159845	373581
RSBN1	Lysine-specific demethylase 9 (KDM9) (EC 1.14.11.-) (Round spermatid basic protein 1)	103409	96702.3	99333.1	123843	97570.6	106754	138558	102281	93462.4
NOL6	Nucleolar protein 6 (Nucleolar RNA-associated protein) (Nrap)	926620	892926	991359	710022	964154	844209	825010	715745	792732
ALDOA	Fructose-bisphosphate aldolase A (EC 4.1.2.13) (Lung cancer antigen NY-LU-1) (Muscle-type aldolase)	1419230	922434	962609	4684870	828900	850057	842099	846857	1092090
LETM1	#N/A	46041.8	73756.3	30807	42013.3		56622.8	39132.8	53351.6	31315.1
SART1	U4/U6.U5 tri-snRNP-associated protein 1 (SNU66 homolog) (hSnu66) (Squamous cell carcinoma antigen recognized by T-cells 1) (SART-1) (hSART-1) (U4/U6.U5 tri-snRNP-associated 110 kDa protein) (allergen Hom s 1)	111197	410471	454313	317414	387365	259614	291345	194392	217626
CHAF1A	#N/A	139233	121499	156171		134184	131477	115534	105597
CLTC	Clathrin heavy chain 1 (Clathrin heavy chain on chromosome 17) (CLH-17)	3561580	3105550	3630040	3184090	3353240	4065240	4036240	3984120	4321220
TBC1D1	TBC1 domain family member 1	102752	110678	156645	119503	139191	117848	149932	219278	172926
ATP6V0D1	V-type proton ATPase subunit d 1 (V-ATPase subunit d 1) (32 kDa accessory protein) (V-ATPase 40 kDa accessory protein) (V-ATPase AC39 subunit) (p39) (Vacuolar proton pump subunit d 1)	229438	225349	168927	324948	195802	227525	241323	273588	288056
SAMHD1	Deoxynucleoside triphosphate triphosphohydrolase SAMHD1 (dNTPase) (EC 3.1.5.-) (Dendritic cell-derived IFNG-induced protein) (DCIP) (Monocyte protein 5) (MOP-5) (SAM domain and HD domain-containing protein 1) (hSAMHD1)	1238350	1853650	1737010	1863860	1841470	2206310	2153230	2010570	1916740
PC	Pyruvate carboxylase, mitochondrial (EC 6.4.1.1) (Pyruvic carboxylase) (PCB)	166295	114376	93201.3	136487	79506.5	104010	80549.2	83094.6	109949
PRDX1	Peroxiredoxin-1 (EC 1.11.1.24) (Natural killer cell-enhancing factor A) (NKEF-A) (Proliferation-associated gene protein) (PAG) (Thioredoxin peroxidase 2) (Thioredoxin-dependent peroxide reductase 2) (Thioredoxin-dependent peroxiredoxin 1)	4359870	4017420	3879140	40638000	3242980	4678110	4684500	3575850	5558600
DDX55	ATP-dependent RNA helicase DDX55 (EC 3.6.4.13) (DEAD box protein 55)	50147.5	104713				160112	139585	145250	124686
UTRN	#N/A	245922	185367	152446	147872	177814	173838	183169	136588	229807
ARID5B	AT-rich interactive domain-containing protein 5B (ARID domain-containing protein 5B) (MRF1-like protein) (Modulator recognition factor 2) (MRF-2)		295538	303793	211280	281508	171803	193834	143670	185734
TOPBP1	DNA topoisomerase 2-binding protein 1 (DNA topoisomerase II-beta-binding protein 1) (TopBP1) (DNA topoisomerase II-binding protein 1)	433975	413064	311967	331313	423196	347949	355029	342427	390053
DHX37	Probable ATP-dependent RNA helicase DHX37 (EC 3.6.4.13) (DEAH box protein 37)	1018310	1190380	1201990	1019980	1257330	1054340	1015590	938086	1016120
ZC3H18	#N/A	129605	197176	217560	126724	186564	218432	233155	202586	231779
MYH9	Myosin-9 (Cellular myosin heavy chain, type A) (Myosin heavy chain 9) (Myosin heavy chain, non-muscle IIa) (Non-muscle myosin heavy chain A) (NMMHC-A) (Non-muscle myosin heavy chain IIa) (NMMHC II-a) (NMMHC-IIA)	6994820	8035370	8293980	6096420	6004060	6138280	6901400	6831660	6815600
ACSL3	Fatty acid CoA ligase Acsl3 (Arachidonate--CoA ligase) (EC 6.2.1.15) (Long-chain acyl-CoA synthetase 3) (LACS 3) (Long-chain-fatty-acid--CoA ligase 3) (EC 6.2.1.3) (Medium-chain acyl-CoA ligase Acsl3) (EC 6.2.1.2)	286874	268572	342045	245991	371594	235222	267097	313436	319725
SMG1	#N/A	150458	183859	160482		184644	182851	155707	244235	209932
DAD1	Dolichyl-diphosphooligosaccharide--protein glycosyltransferase subunit DAD1 (Oligosaccharyl transferase subunit DAD1) (Defender against cell death 1) (DAD-1)	469183	511302	922932	1007650	485965	544495	609216	640680	542771
FAM76B	Protein FAM76B	103424	222203	255224		245830	253438	259958	279566	280936
RAB3GAP2	Rab3 GTPase-activating protein non-catalytic subunit (RGAP-iso) (Rab3 GTPase-activating protein 150 kDa subunit) (Rab3-GAP p150) (Rab3-GAP150) (Rab3-GAP regulatory subunit)	157769	146531	165691	240794	167729	174900	144913	200871	167422
MYO1D	Unconventional myosin-Id	181039	413376	534713	425524	232285	427612	307511	350896	312482
TENT4B	Terminal nucleotidyltransferase 4B (Non-canonical poly(A) RNA polymerase PAPD5) (EC 2.7.7.19) (PAP-associated domain-containing protein 5) (Terminal guanylyltransferase) (EC 2.7.7.-) (Terminal uridylyltransferase 3) (TUTase 3) (Topoisomerase-related function protein 4-2) (TRF4-2)	354775	350051	352722	260810	343129	526078	522280	490325	540414
DLD	Dihydrolipoyl dehydrogenase, mitochondrial (EC 1.8.1.4) (Dihydrolipoamide dehydrogenase) (Glycine cleavage system L protein)	581981	455158	322086	431471	476594	469420	513747	566840	493664
COG7	#N/A	474541					207818	212279	181116
MRPL24	#N/A		143953	154561	89039.8	143601	131699	165093	131846	159192
EMC1	ER membrane protein complex subunit 1	180522	149663	166794	371496	147927	175780	186596	212138	206688
RPS8	Small ribosomal subunit protein eS8 (40S ribosomal protein S8)	6997220	7094500	7644470	5963860	6409060	8341600	7922440	8519620	7120370
PSMC6	26S proteasome regulatory subunit 10B (26S proteasome AAA-ATPase subunit RPT4) (Proteasome 26S subunit ATPase 6) (Proteasome subunit p42)	136742	140805	125676	196013	117462	172539	185352	169591	195646
HSP90AB1	Heat shock protein HSP 90-beta (HSP 90) (Heat shock 84 kDa) (HSP 84) (HSP84)	7935390	8346370	8812930	7541660	8735290	10369000	10215700	10267800	10779400
SERPINB7	Serpin B7 (Megsin) (TP55)	217990	177154	170127	4176850	158676	157905	187281	191027	251991
ANO10	#N/A		59477.5	72707.1	37726.9				48874.7	38305.2
EIF2S1	Eukaryotic translation initiation factor 2 subunit 1 (Eukaryotic translation initiation factor 2 subunit alpha) (eIF-2-alpha) (eIF-2A) (eIF-2alpha) (eIF2-alpha)	2781750	2898980	3027170	2944620	3433760	2500530	3123310	3433050	3220910
GLG1	Golgi apparatus protein 1 (CFR-1) (Cysteine-rich fibroblast growth factor receptor) (E-selectin ligand 1) (ESL-1) (Golgi sialoglycoprotein MG-160)			31116.9	101665	20868.9		16083.7		94244.5
ATP5F1C	ATP synthase subunit gamma, mitochondrial (ATP synthase F1 subunit gamma) (F-ATPase gamma subunit)	567403	495497	441098	675648	207527	333334	358331	432489	321066
PHF12	PHD finger protein 12 (PHD factor 1) (Pf1)		208509	159173	226855	192840	163441	151879	159776	189694
NEIL1	#N/A	20543.9	70861.3	54465.3	50792.8	48886.9	81496.5	90559.5	112664
OXSR1	Serine/threonine-protein kinase OSR1 (EC 2.7.11.1) (Oxidative stress-responsive 1 protein)	90675.3	93302.6	105331	93898.1	22646.6	104881	145313	46822.1	97626.4
PRR14L	Protein PRR14L (Proline rich 14-like protein)			36652.9		28907.3	43737	36846	67630.8
NPM1	Nucleophosmin (NPM) (Nucleolar phosphoprotein B23) (Nucleolar protein NO38) (Numatrin)	2460600	2679040	2796880	2718750	2427910	2867950	2723090	2186170	2264060
ATP5F1B	ATP synthase subunit beta, mitochondrial (EC 7.1.2.2) (ATP synthase F1 subunit beta)	2279140	1960800	2600470	2329790	1845690	1677800	1844260	1985810	1720620
MARS1	Methionine--tRNA ligase, cytoplasmic (EC 6.1.1.10) (Methionyl-tRNA synthetase) (MetRS)	145242	144968	161868	186835	209329	191877	113580	197392	170186
GTF2F2	#N/A	96898.6							196498
CHD8	Chromodomain-helicase-DNA-binding protein 8 (CHD-8) (EC 3.6.4.12) (ATP-dependent helicase CHD8) (Helicase with SNF2 domain 1)	255494	356786	290431	262272	308588	308701	318941	318938	347594
FAM83D	#N/A	62551.8	86000.8	57116.8	34716.4	43525.4	48002.4	52304.9	35026.2	50800.3
AHNAK	#N/A	67754.9	48913	33763.5	41275.2	43167.2	57581.4	50447.1
RAB14	Ras-related protein Rab-14	680848	616951	710720	2062250	628723	772512	800675	690915	679014
PSME4	Proteasome activator complex subunit 4 (Proteasome activator PA200)									145228
KRT14	Keratin, type I cytoskeletal 14 (Cytokeratin-14) (CK-14) (Keratin-14) (K14)	89035200	117559000	88164800	11108000000	116254000	108147000	156200000	127508000	593310000
KRT10	Keratin 10			30321.7	23151600	62677.9		53948	41211	250935
	Keratin, type I cytoskeletal 10 (Cytokeratin-10) (CK-10) (Keratin-10) (K10)	137877000	172287000	87616700	7740620000	156081000	109336000	146260000	188495000	406775000
NCAPG2	Condensin-2 complex subunit G2 (Chromosome-associated protein G2) (CAP-G2) (hCAP-G2) (Leucine zipper protein 5) (Non-SMC condensin II complex subunit G2)		156232	182065	111183	180651	207001	231408	266795	214826
MRPL46	#N/A	37195.2	27205.4	61306.5	54914.1	11481.7	54132.1	57686.8	77083.1	66857.9
CYCS	Cytochrome c	382580	279300	319644	1104360	189994	182918	254878	231321	258857
GTF3C2	General transcription factor 3C polypeptide 2 (TF3C-beta) (Transcription factor IIIC 110 kDa subunit) (TFIIIC 110 kDa subunit) (TFIIIC110) (Transcription factor IIIC subunit beta)	168026	156466	198896	362412	70609.6	226855	222955	200245	243331
EPC1	#N/A		120664	92937.9		115699	56255.7	77152.2	75774.4	88124.3
TDP1	Tyrosyl-DNA phosphodiesterase 1 (Tyr-DNA phosphodiesterase 1) (EC 3.1.4.-)			11661.8			12465.5		36057.5
ASCC3	Activating signal cointegrator 1 complex subunit 3 (EC 3.6.4.12) (ASC-1 complex subunit p200) (ASC1p200) (Helicase, ATP binding 1) (Trip4 complex subunit p200)	157514	139689	187024	183854	200662	169009	167819	198916	263449
SLC3A2	Amino acid transporter heavy chain SLC3A2 (4F2 cell-surface antigen heavy chain) (4F2hc) (4F2 heavy chain antigen) (Lymphocyte activation antigen 4F2 large subunit) (Solute carrier family 3 member 2) (CD antigen CD98)	206756	208165	225100	290394	222877	158478	171416	152798	173298
LSG1	Large subunit GTPase 1 homolog (hLsg1) (EC 3.6.1.-)	282796	258665	213231	203864	291734	314456	241808	326264	333150
SERPINA3	Alpha-1-antichymotrypsin (ACT) (Cell growth-inhibiting gene 24/25 protein) (Serpin A3) [Cleaved into: Alpha-1-antichymotrypsin His-Pro-less]	1327290	860782	726720	1262700	837613	820644	746661	632083	807100
MAP4	Microtubule-associated protein 4 (MAP-4)	288634	145919	127942	206541	89163.4	133431	113304	111062	125213
	#N/A	840852	870620	1067350	733879	979662	837716	824044	792412	893500
UQCRC1	Cytochrome b-c1 complex subunit 1, mitochondrial (Complex III subunit 1) (Core protein I) (Ubiquinol-cytochrome-c reductase complex core protein 1)	2176460	2272860	2880950	2621360	2380490	2473330	3036140	3438780	3083840
	#N/A	256333	405692	346912	168880	503536	303247	291087	483956	343920
XPO4	Exportin-4 (Exp4)	208137	96060.4	89210.3		68058.8	105975	102995	98857.8	84789.3
DNAJC13	DnaJ homolog subfamily C member 13 (Required for receptor-mediated endocytosis 8) (RME-8)	144791	150608	168536	137590	155006	213087	248987	222894	225813
IARS2	Isoleucine--tRNA ligase, mitochondrial (EC 6.1.1.5) (Isoleucyl-tRNA synthetase) (IleRS)	132456	161000	173548	209881	182720	181245	138585	178474	194226
MYH10	Myosin-10 (Cellular myosin heavy chain, type B) (Myosin heavy chain 10) (Myosin heavy chain, non-muscle IIb) (Non-muscle myosin heavy chain B) (NMMHC-B) (Non-muscle myosin heavy chain IIb) (NMMHC II-b) (NMMHC-IIB)	541767	404399	388766	574216	285086	446087	448677	394305	496259
TARS1	Threonine--tRNA ligase 1, cytoplasmic (EC 6.1.1.3) (Threonyl-tRNA synthetase) (ThrRS) (Threonyl-tRNA synthetase 1)	621519	632787	610993	1012940	648417	549258	562045	620081	600215
HADHA	Trifunctional enzyme subunit alpha, mitochondrial (78 kDa gastrin-binding protein) (Monolysocardiolipin acyltransferase) (EC 2.3.1.-) (TP-alpha) [Includes: Long-chain enoyl-CoA hydratase (EC 4.2.1.17); Long chain 3-hydroxyacyl-CoA dehydrogenase (EC 1.1.1.211)]	524859	459589	497144	392060	447949	606774	633285	705767	645314
ABCB7	Iron-sulfur clusters transporter ABCB7, mitochondrial (ATP-binding cassette sub-family B member 7, mitochondrial) (ATP-binding cassette transporter 7) (ABC transporter 7 protein)	242699	208973	273508		233119	275288	343385	158688	263740
TASOR2	#N/A	173326	256618	268691	188331	235846	370123	328495	388060	233824
SMARCC2	SWI/SNF complex subunit SMARCC2 (BRG1-associated factor 170) (BAF170) (SWI/SNF complex 170 kDa subunit) (SWI/SNF-related matrix-associated actin-dependent regulator of chromatin subfamily C member 2)	116285	276437	214114	285045	209175	229197	198099	232998	247031
UBA2	SUMO-activating enzyme subunit 2 (EC 2.3.2.-) (Anthracycline-associated resistance ARX) (Ubiquitin-like 1-activating enzyme E1B) (Ubiquitin-like modifier-activating enzyme 2)	135436	286138	246498	228687	261646	285795	290865	212782	204338
CHTF18	Chromosome transmission fidelity protein 18 homolog (hCTF18) (CHL12)	87032.9	76855.4	57093.3	70232	76580.3	80786.4	97762	124289	79970.4
RPS6KA3	Ribosomal protein S6 kinase alpha-3 (S6K-alpha-3) (EC 2.7.11.1) (90 kDa ribosomal protein S6 kinase 3) (p90-RSK 3) (p90RSK3) (Insulin-stimulated protein kinase 1) (ISPK-1) (MAP kinase-activated protein kinase 1b) (MAPK-activated protein kinase 1b) (MAPKAP kinase 1b) (MAPKAPK-1b) (Ribosomal S6 kinase 2) (RSK-2) (pp90RSK2)	102468	166368	141460	262410	140066	165516	223487	146962	241066
MORF4L2	#N/A	127193	1086080	1043550	717154	860445	705079	664723	579282	619452
GNB2	Guanine nucleotide-binding protein G(I)/G(S)/G(T) subunit beta-2 (G protein subunit beta-2) (Transducin beta chain 2)	3141620	3612690	4569630	6728180	3722190	3919870	4303790	4863320	4615280
POLR2H	DNA-directed RNA polymerases I, II, and III subunit RPABC3 (RNA polymerases I, II, and III subunit ABC3) (DNA-directed RNA polymerase II subunit H) (DNA-directed RNA polymerases I, II, and III 17.1 kDa polypeptide) (RPB17) (RPB8 homolog) (hRPB8)	1155730	1114500	1049710	846965	960801	909922	963874	958545	1199350
EHD1	EH domain-containing protein 1 (PAST homolog 1) (hPAST1) (Testilin)	79403.8	92625.6	97107.7	716262	84538.4	94284.7	132724	93509.4	130386
THOC2	THO complex subunit 2 (Tho2) (hTREX120)	625584	530222	544489	394308	541590	602552	598701	528859	579601
CALM1;CALM2;CALM3	Calmodulin-1	333387	156190	174262	391439	126417	167885	138713	110259	173218
EHD4	EH domain-containing protein 4 (Hepatocellular carcinoma-associated protein 10/11) (PAST homolog 4)	43815	84177.5	72199.9	166927	43876.4	76016.9	106995	72535.2	94329.8
RPS14	Small ribosomal subunit protein uS11 (40S ribosomal protein S14)	3244570	3423940	3380760	3224320	3229070	4045420	4369020	4599210	3971320
RBMX2	RNA-binding motif protein, X-linked 2	1767590	1352700	1337140	1155160	1077700	1263440	1245170	1220860	1366500
SEC16A	Protein transport protein Sec16A (SEC16 homolog A) (p250)	813124	615741	781101	577181	708227	854138	972604	830603	839785
TMEM201	Transmembrane protein 201 (Spindle-associated membrane protein 1)		411395	399914	353185	558431	376267	419803	518743	530380
SAFB	Scaffold attachment factor B1 (SAF-B) (SAF-B1) (HSP27 estrogen response element-TATA box-binding protein) (HSP27 ERE-TATA-binding protein)	3709650	4738930	4597240	2547950	4367160	2760410	3378800	2883130	2967370
CMTR1	Cap-specific mRNA (nucleoside-2'-O-)-methyltransferase 1 (EC 2.1.1.57) (Cap methyltransferase 1) (Cap1 2'O-ribose methyltransferase 1) (MTr1) (hMTr1) (FtsJ methyltransferase domain-containing protein 2) (Interferon-stimulated gene 95 kDa protein) (ISG95)	532549	487975	521435	455483	474085	675672	672586	491176	555892
NCOR1	Nuclear receptor corepressor 1 (N-CoR) (N-CoR1)		126218	114189	79259.6	84022	153677	268026	110483	102249
NCBP3	Nuclear cap-binding protein subunit 3 (Protein ELG)	150594	178639	213950	135890	185722	180701	218049	155812	174888
NCOR2	#N/A						21626.1	22839.3
KIF20A	Kinesin-like protein KIF20A (GG10_2) (Mitotic kinesin-like protein 2) (MKlp2) (Rab6-interacting kinesin-like protein) (Rabkinesin-6)	1033640	904636	804563	549639	862070	868152	869405	855660	934489
MRE11	Double-strand break repair protein MRE11 (EC 3.1.-.-) (Double-strand break repair protein MRE11A) (Meiotic recombination 11 homolog 1) (MRE11 homolog 1) (Meiotic recombination 11 homolog A) (MRE11 homolog A)	104234	151747	71934	112281	119723	137850	129187	106920	112445
PSMC4	26S proteasome regulatory subunit 6B (26S proteasome AAA-ATPase subunit RPT3) (MB67-interacting protein) (MIP224) (Proteasome 26S subunit ATPase 4) (Tat-binding protein 7) (TBP-7)	192655	268784	258864	361024	241626	248667	263852	217363	335939
KRT6A	Keratin, type II cytoskeletal 6A (Cytokeratin-6A) (CK-6A) (Cytokeratin-6D) (CK-6D) (Keratin-6A) (K6A) (Type-II keratin Kb6) (allergen Hom s 5)	12445500	10943500	12305200	1864030000	13230500	11565100	16882300	18225900	82473100
SEPTIN9	Septin-9 (MLL septin-like fusion protein MSF-A) (MLL septin-like fusion protein) (Ovarian/Breast septin) (Ov/Br septin) (Septin D1)	159782	152378	162956	186915	138373	165433	148424	140709	177801
KMT2D	Histone-lysine N-methyltransferase 2D (Lysine N-methyltransferase 2D) (EC 2.1.1.364) (ALL1-related protein) (Myeloid/lymphoid or mixed-lineage leukemia protein 2)	149075	240115	219265	206528	182055	190219	182978	175461	193185
EHMT1	Histone-lysine N-methyltransferase EHMT1 (EC 2.1.1.-) (EC 2.1.1.367) (Euchromatic histone-lysine N-methyltransferase 1) (Eu-HMTase1) (G9a-like protein 1) (GLP) (GLP1) (Histone H3-K9 methyltransferase 5) (H3-K9-HMTase 5) (Lysine N-methyltransferase 1D)	537152	1195740	921691	945167	991997	774407	655210	572207	680187
	#N/A	408828	363787	420918	319110	307257	319966	264068	361390	266789
GTPBP4	GTP-binding protein 4 (Chronic renal failure gene protein) (GTP-binding protein NGB) (Nucleolar GTP-binding protein 1)	3731380	5075540	4918430	2848320	4555350	4375390	3925010	3915820	3426730
PNPLA6	#N/A		26281.8	30450.7		29800.1	53640.4	33930.4	48851.9	23455.4
NCSTN	Nicastrin	80987	56410.9	43109.7	408165	96712	26050	50960.2	53754.8	67472.4
MED13	#N/A	43711.8	20011	24616.8		67281.5		31639.5	50346.3	64953.3
BZW2	eIF5-mimic protein 1 (Basic leucine zipper and W2 domain-containing protein 2)	159183	134502	149433	174236	79304.1	128086	97569.8	158666	166958
CAT	Catalase (EC 1.11.1.6)	518856	463992	288028	7235810	321461	350255	465294	404760	676463
CIT	Citron Rho-interacting kinase (CRIK) (EC 2.7.11.1) (Serine/threonine-protein kinase 21)	99896.9	92850.4	108994	80784.7	142197	120879	162732	149192	196537
TRIM28	Transcription intermediary factor 1-beta (TIF1-beta) (E3 SUMO-protein ligase TRIM28) (EC 2.3.2.27) (KRAB-associated protein 1) (KAP-1) (KRAB-interacting protein 1) (KRIP-1) (Nuclear corepressor KAP-1) (RING finger protein 96) (RING-type E3 ubiquitin transferase TIF1-beta) (Tripartite motif-containing protein 28)	305743	8388340	9749320	6960010	6815010	6950600	6036760	4591880	5353680
ZNF217	#N/A	388281	253649	65937.9	560289	224102	266308	290374	247305	298347
PARL	Presenilin-associated rhomboid-like protein, mitochondrial (EC 3.4.21.105) (Mitochondrial intramembrane cleaving protease PARL) [Cleaved into: P-beta (Pbeta)]	142164	246817	325838	245539	285051	345148	440580	296896	354673
ASNS	Asparagine synthetase [glutamine-hydrolyzing] (EC 6.3.5.4) (Cell cycle control protein TS11) (Glutamine-dependent asparagine synthetase)	168827	113606	136797	87396	94922.1	134877	136771	76147	49330.8
KDM5C	Lysine-specific demethylase 5C (EC 1.14.11.67) (Histone demethylase JARID1C) (Jumonji/ARID domain-containing protein 1C) (Protein SmcX) (Protein Xe169) ([histone H3]-trimethyl-L-lysine(4) demethylase 5C)	63633.2	216953	172229	130391	160874	108495	132394	126233	111251
SMARCE1	SWI/SNF-related matrix-associated actin-dependent regulator of chromatin subfamily E member 1 (BRG1-associated factor 57) (BAF57)	23796.2	60694	63070.6	47336.6	85338.1	55689.7	71622.9	67463.9	43756.1
SHPK	Sedoheptulokinase (SHK) (EC 2.7.1.14) (Carbohydrate kinase-like protein)				222342
SELENOH	Selenoprotein H (SelH)	296061	399487	297535	392211	296571	348599	289092	314297	369138
CASZ1	Zinc finger protein castor homolog 1 (Castor-related protein) (Putative survival-related protein) (Zinc finger protein 693)		165039	192246	73439.6	85454.9	61244.7	54501.3	52326.8	39428.8
CTR9	RNA polymerase-associated protein CTR9 homolog (SH2 domain-binding protein 1)	207706	277639	239651	268369	234753	250238	243354	218769	222364
PKN1	Serine/threonine-protein kinase N1 (EC 2.7.11.13) (Protease-activated kinase 1) (PAK-1) (Protein kinase C-like 1) (Protein kinase C-like PKN) (Protein kinase PKN-alpha) (Protein-kinase C-related kinase 1) (Serine-threonine protein kinase N)	66338.9	78991.5	72736.7	80572.6	84130.4	75466.9	80938.3	118151	92914.6
DDX24	ATP-dependent RNA helicase DDX24 (EC 3.6.4.13) (DEAD box protein 24)	1134450	1479850	1423910	1090790	1361750	1334300	1125000	1073360	1158110
KRT1	Keratin, type II cytoskeletal 1 (67 kDa cytokeratin) (Cytokeratin-1) (CK-1) (Hair alpha protein) (Keratin-1) (K1) (Type-II keratin Kb1)	183278000	272898000	101601000	6334170000	180544000	141680000	214313000	188037000	576663000
ZGPAT	#N/A		40482.7		46544.1	34013.7	53185.6	58484.4	46000	34040.1
FLNA	Filamin-A (FLN-A) (Actin-binding protein 280) (ABP-280) (Alpha-filamin) (Endothelial actin-binding protein) (Filamin-1) (Non-muscle filamin)	271200	315187	280985	1142930	249699	339025	348866	201200	292337
LEG1	Protein LEG1 homolog	417868	274933	254573	667836	213444	248532	261318	198563	281015
TBC1D15	TBC1 domain family member 15 (GTPase-activating protein RAB7) (GAP for RAB7) (Rab7-GAP)	168298	224453	257024	168199	275023	294304	285283	341714	336099
EPC2	Enhancer of polycomb homolog 2 (EPC-like)	53821.5	667249	604043	463316	542711	298289	271324	258361	296460
ASH1L	#N/A	71011.2	115469	92786.5	58603.5	99793.2	101400	77492.1	77065.8	76384.1
HEATR1	HEAT repeat-containing protein 1 (Protein BAP28) (U3 small nucleolar RNA-associated protein 10 homolog) [Cleaved into: HEAT repeat-containing protein 1, N-terminally processed]	3364370	5773940	5605370	4361960	5184120	4183490	3931500	3756320	3167410
POLR3A	DNA-directed RNA polymerase III subunit RPC1 (RNA polymerase III subunit C1) (EC 2.7.7.6) (DNA-directed RNA polymerase III largest subunit) (DNA-directed RNA polymerase III subunit A) (RNA polymerase III 155 kDa subunit) (RPC155) (RNA polymerase III subunit C160)	269886	305150	279446	201027	303447	345744	320836	320957	330236
ITIH4	Inter-alpha-trypsin inhibitor heavy chain H4 (ITI heavy chain H4) (ITI-HC4) (Inter-alpha-inhibitor heavy chain 4) (Inter-alpha-trypsin inhibitor family heavy chain-related protein) (IHRP) (Plasma kallikrein sensitive glycoprotein 120) (Gp120) (PK-120) [Cleaved into: 70 kDa inter-alpha-trypsin inhibitor heavy chain H4; 35 kDa inter-alpha-trypsin inhibitor heavy chain H4]	743832	517419	456700	727118	485820	521728	492225	425530	500689
ARL6IP4	ADP-ribosylation factor-like protein 6-interacting protein 4 (ARL-6-interacting protein 4) (Aip-4) (HSP-975) (HSVI-binding protein) (SR-15) (SRp25) (SR-25) (Splicing factor SRrp37)	233101	40727.3	194911	106605	177512	178716	171527	130880	146404
FKBP4	Peptidyl-prolyl cis-trans isomerase FKBP4 (PPIase FKBP4) (EC 5.2.1.8) (51 kDa FK506-binding protein) (FKBP51) (52 kDa FK506-binding protein) (52 kDa FKBP) (FKBP-52) (59 kDa immunophilin) (p59) (FK506-binding protein 4) (FKBP-4) (FKBP59) (HSP-binding immunophilin) (HBI) (Immunophilin FKBP52) (Rotamase) [Cleaved into: Peptidyl-prolyl cis-trans isomerase FKBP4, N-terminally processed]	481892	433770	342723	694668	543058	406298	525530	561762	534920
HOOK3	#N/A	175489	76548.7	88534.8	142108	93889.9	69840.5	133567	147534	247791
NACC1	Nucleus accumbens-associated protein 1 (NAC-1) (BTB/POZ domain-containing protein 14B)	963534	2626530	1949060	2253550	2506130	1939380	2193410	1896500	1777200
ANXA2	Annexin A2 (Annexin II) (Annexin-2) (Calpactin I heavy chain) (Calpactin-1 heavy chain) (Chromobindin-8) (Lipocortin II) (Placental anticoagulant protein IV) (PAP-IV) (Protein I) (p36)	1091570	894916	747005	16839500	734979	751132	897684	798235	1260980
ITIH2	Inter-alpha-trypsin inhibitor heavy chain H2 (ITI heavy chain H2) (ITI-HC2) (Inter-alpha-inhibitor heavy chain 2) (Inter-alpha-trypsin inhibitor complex component II) (Serum-derived hyaluronan-associated protein) (SHAP)	1884940	1331550	1152410	2049720	1113680	1308410	1249940	1086210	1249860
ADO	#N/A		51275.3	41432.3		39472.9	39735.5	74766.3	50226.3	43909.3
PCNA	Proliferating cell nuclear antigen (PCNA) (Cyclin)	9519660	12406100	10683300	8841250	11579000	10001300	9498770	10262400	11457800
DYNC1LI1	Cytoplasmic dynein 1 light intermediate chain 1 (LIC1) (Dynein light chain A) (DLC-A) (Dynein light intermediate chain 1, cytosolic)	124380	98062	92580.3	122918	70682.9	90645.6	116718	103342	106051
UTP14A	U3 small nucleolar RNA-associated protein 14 homolog A (Antigen NY-CO-16) (Serologically defined colon cancer antigen 16)	366701	210684	201620	189938	219282	175295	148351	177421	125611
KIF23	Kinesin-like protein KIF23 (Kinesin-like protein 5) (Mitotic kinesin-like protein 1)	202048	196559	219405	192872	226622	231165	267953	224521	236736
TCOF1	Treacle protein (Treacher Collins syndrome protein)	475393	637813	590187	419147	641919	572928	537798	563272	565967
CANX	Calnexin (IP90) (Major histocompatibility complex class I antigen-binding protein p88) (p90)	181243	184029	217519	327636	163488	205903	243334	214581	191123
TFIP11	Tuftelin-interacting protein 11 (Septin and tuftelin-interacting protein 1) (STIP-1)		35798.1	55606.8	52517.5	64147.7	58868.5	58504.1	55210.7	58409.8
RHOT2	Mitochondrial Rho GTPase 2 (MIRO-2) (hMiro-2) (EC 3.6.5.-) (Ras homolog gene family member T2)	80322.6	95736.8	132238	74646	128723	111762	100051	150593	137822
RHOT1	Mitochondrial Rho GTPase 1 (MIRO-1) (hMiro-1) (EC 3.6.5.-) (Rac-GTP-binding protein-like protein) (Ras homolog gene family member T1)	353186	284163	461770	323932	393391	422752	519544	488298	423512
ACAA1	3-ketoacyl-CoA thiolase, peroxisomal (EC 2.3.1.16) (Acetyl-CoA C-myristoyltransferase) (EC 2.3.1.155) (Acetyl-CoA acyltransferase) (EC 2.3.1.9) (Beta-ketothiolase) (Peroxisomal 3-oxoacyl-CoA thiolase)		36907.8	22291.1		20351.2	71267.8		43803.5	33817.8
DNM1L	Dynamin-1-like protein (EC 3.6.5.5) (Dnm1p/Vps1p-like protein) (DVLP) (Dynamin family member proline-rich carboxyl-terminal domain less) (Dymple) (Dynamin-like protein) (Dynamin-like protein 4) (Dynamin-like protein IV) (HdynIV) (Dynamin-related protein 1)	104184	102785	94180.2	117272	84247.4	126685	106536	82959.4	105692
NKAP	NF-kappa-B-activating protein	784637	558709	524263	424773	543024	458002	458131	464910	481246
MCRS1	Microspherule protein 1 (58 kDa microspherule protein) (Cell cycle-regulated factor p78) (INO80 complex subunit J) (MCRS2)	143285	117186	132558		116914	130709	148549	147720	149663
TPM4	Tropomyosin alpha-4 chain (TM30p1) (Tropomyosin-4)				163682
LYN	Tyrosine-protein kinase Lyn (EC 2.7.10.2) (Lck/Yes-related novel protein tyrosine kinase) (V-yes-1 Yamaguchi sarcoma viral related oncogene homolog) (p53Lyn) (p56Lyn)	903958	1081480	1301610	1016360	1132680	1130720	1366040	1528390	1381710
ERCC4	DNA repair endonuclease XPF (EC 3.1.-.-) (DNA excision repair protein ERCC-4) (DNA repair protein complementing XP-F cells) (Xeroderma pigmentosum group F-complementing protein)		65343.6			11471.2	49427.3
THRAP3	Thyroid hormone receptor-associated protein 3 (BCLAF1 and THRAP3 family member 2) (Thyroid hormone receptor-associated protein complex 150 kDa component) (Trap150)	523917	371770	452206	323750	350108	476939	425298	391666	407778
ALB	Albumin	43110900	30598700	27941400	48135700	39874400	28656500	28040500	25479800	29127400
	#N/A	2145830	2246720	2178420	1502600	1928930	1745740	1357650	1556660	1430960
PHF6	PHD finger protein 6 (PHD-like zinc finger protein)	2001290	2178180	2223100	1584520	2223550	1813090	1905090	2056960	1953700
FIP1L1	Pre-mRNA 3'-end-processing factor FIP1 (hFip1) (FIP1-like 1 protein) (Factor interacting with PAP) (Rearranged in hypereosinophilia)	157298	73933.3	62608		53569.1	96042.3	101864	91269.7	68311.1
HNRNPU	Heterogeneous nuclear ribonucleoprotein U	1482610	1405470	1426460	353224	2074860	1085060	1507840	1141850	826012
	Heterogeneous nuclear ribonucleoprotein U (hnRNP U) (GRIP120) (Nuclear p120 ribonucleoprotein) (Scaffold-attachment factor A) (SAF-A) (p120) (pp120)	77177500	81923600	82348500	72537400	80921200	83473500	70738200	69524600	71182300
ATXN2L	Ataxin-2-like protein (Ataxin-2 domain protein) (Ataxin-2-related protein)	134196	121060	158544	174345	99921.6	167589	150064	132421	145327
ABCF3	ATP-binding cassette sub-family F member 3	143803	153552	124258		117544	189382	173492	169180	128095
FAM120A	Constitutive coactivator of PPAR-gamma-like protein 1 (Oxidative stress-associated SRC activator) (Protein FAM120A)	573470	560291	635367	488472	571340	666871	696035	647305	608846
AP3D1	AP-3 complex subunit delta-1 (AP-3 complex subunit delta) (Adaptor-related protein complex 3 subunit delta-1) (Delta-adaptin)	153902	202773	201527	147245	178925	185786	172408	170767	160221
RPS19BP1	Active regulator of SIRT1 (40S ribosomal protein S19-binding protein 1) (RPS19-binding protein 1) (S19BP)	167948	118618	112753	9747.2	82689.5	131952	107011	117619	95030
PRRC2C	#N/A		29808.6	29494.9			34091	69355.6	55595.6	29056.5
SUN2	#N/A	54906.3	83109.7	80811.4	107196	46082.4	72199.3	69644.1	58862.5	92846
CMAS	N-acylneuraminate cytidylyltransferase (EC 2.7.7.43) (CMP-N-acetylneuraminic acid synthase) (CMP-NeuNAc synthase)	834407	876745	894089	764810	833936	740916	810596	985939	1098480
MORC3	MORC family CW-type zinc finger protein 3 (Nuclear matrix protein 2) (Zinc finger CW-type coiled-coil domain protein 3)	1214210	14961300	17238300	11212000	10959400	7563110	7321180	5666460	6830540
KRT5	Keratin, type II cytoskeletal 5 (58 kDa cytokeratin) (Cytokeratin-5) (CK-5) (Keratin-5) (K5) (Type-II keratin Kb5)	52623800	63583700	36157900	2993470000	52510900	43120200	63666700	60614900	194675000
UBE4B	Ubiquitin conjugation factor E4 B (EC 2.3.2.27) (Homozygously deleted in neuroblastoma 1) (RING-type E3 ubiquitin transferase E4 B) (Ubiquitin fusion degradation protein 2)	68067.3	25568.5	67904.4		76317.5	58610.5	85910.4	101897	97602.2
ATP2A2	Sarcoplasmic/endoplasmic reticulum calcium ATPase 2 (SERCA2) (SR Ca(2+)-ATPase 2) (EC 7.2.2.10) (Calcium pump 2) (Calcium-transporting ATPase sarcoplasmic reticulum type, slow twitch skeletal muscle isoform) (Endoplasmic reticulum class 1/2 Ca(2+) ATPase)	1456110	1645930	1633540	1451900	1595610	1682450	1854900	1744750	1726380
VPS25	#N/A	52670.5		56387.4		70883.5	65568.4	85130.6	41526	32339
STK17B	Serine/threonine-protein kinase 17B (EC 2.7.11.1) (DAP kinase-related apoptosis-inducing protein kinase 2)	132820	198598	142413		169463	308049	386343	249263	239605
SRPK1	SRSF protein kinase 1 (EC 2.7.11.1) (SFRS protein kinase 1) (Serine/arginine-rich protein-specific kinase 1) (SR-protein-specific kinase 1)	97016.6	96620.4	116348	197766	111443	94138.6	135065	136853	115108
POLR2A	DNA-directed RNA polymerase II subunit RPB1 (RNA polymerase II subunit B1) (EC 2.7.7.6) (DNA-directed RNA polymerase II subunit A) (DNA-directed RNA polymerase III largest subunit) (RNA-directed RNA polymerase II subunit RPB1) (EC 2.7.7.48)	4551690	4791920	4327700	2966120	4039580	3491390	3287510	3225640	3297360
ATIC	Bifunctional purine biosynthesis protein ATIC (AICAR transformylase/inosine monophosphate cyclohydrolase) (ATIC) [Cleaved into: Bifunctional purine biosynthesis protein ATIC, N-terminally processed] [Includes: Phosphoribosylaminoimidazolecarboxamide formyltransferase (EC 2.1.2.3) (5-aminoimidazole-4-carboxamide ribonucleotide formyltransferase) (AICAR formyltransferase) (AICAR transformylase); In…	747044	754605	720795	773772	643166	661359	594998	610815	621701
GANAB	Neutral alpha-glucosidase AB (EC 3.2.1.207) (Alpha-glucosidase 2) (Glucosidase II subunit alpha)	352260	257205	257511	452494	173274	242801	211103	160868	244201
MTF2	Metal-response element-binding transcription factor 2 (Metal regulatory transcription factor 2) (Metal-response element DNA-binding protein M96) (Polycomb-like protein 2) (hPCl2)	83027.2	137644	179750	123544	187415	145077	168429	136499	84262.9
SFPQ	Splicing factor, proline- and glutamine-rich (100 kDa DNA-pairing protein) (hPOMp100) (DNA-binding p52/p100 complex, 100 kDa subunit) (Polypyrimidine tract-binding protein-associated-splicing factor) (PSF) (PTB-associated-splicing factor)	2897100	2829960	2675610	2123560	2526820	2797960	2904140	2486800	2818280
APRT	Adenine phosphoribosyltransferase (APRT) (EC 2.4.2.7)	289564	218391	187991	284875	200871	227599	211645	152379	264344
XPO6	#N/A	29411.6		55876.6		64550.5	40098.5	40330.7	33660.3	38338.4
MAP7D1	#N/A							20957.6
PRRC2A	#N/A	58076		74415.6		71651.8	32197.1	63032.8	39998.9	44695.5
DSP	Desmoplakin (DP) (250/210 kDa paraneoplastic pemphigus antigen)	2581870	3394970	1579700	118256000	2477790	1963990	3162100	1715930	8481060
TRIM27	Zinc finger protein RFP (EC 2.3.2.27) (RING finger protein 76) (Ret finger protein) (Tripartite motif-containing protein 27)	347099	487717	453250	385794	484653	355763	396338	369721	431610
SSB	Lupus La protein (La autoantigen) (La ribonucleoprotein) (Sjoegren syndrome type B antigen) (SS-B)	459274	481071	472129	398524	395365	463971	654658	369952	366813
GOLGA3	#N/A				4928780
APOA1	Apolipoprotein A-I (Apo-AI) (ApoA-I) (Apolipoprotein A1) [Cleaved into: Proapolipoprotein A-I (ProapoA-I); Truncated apolipoprotein A-I (Apolipoprotein A-I(1-242))]	4814320	3584930	3095710	5463280	3396480	3305660	3148260	2815430	3291530
PSMD11	26S proteasome non-ATPase regulatory subunit 11 (26S proteasome regulatory subunit RPN6) (26S proteasome regulatory subunit S9) (26S proteasome regulatory subunit p44.5)	103905	115014	108361	130049	112258	145633	150872	117500	113755
ACSL1	Long-chain-fatty-acid--CoA ligase 1 (EC 6.2.1.3) (Acyl-CoA synthetase 1) (ACS1) (Arachidonate--CoA ligase) (EC 6.2.1.15) (Long-chain acyl-CoA synthetase 1) (LACS 1) (Long-chain acyl-CoA synthetase 2) (LACS 2) (Long-chain fatty acid-CoA ligase 2) (Palmitoyl-CoA ligase 1) (Palmitoyl-CoA ligase 2) (Phytanate--CoA ligase) (EC 6.2.1.24)	198667	256929	203085	161438	191496	323229	262373	328474	205617
DDX60	Probable ATP-dependent RNA helicase DDX60 (EC 3.6.4.13) (DEAD box protein 60)	42713.3	81940.4	68227	116091	85895.5	36307.2	21477.9	49202.8	28978.8
DCAF1	DDB1- and CUL4-associated factor 1 (HIV-1 Vpr-binding protein) (VprBP) (Serine/threonine-protein kinase VPRBP) (EC 2.7.11.1) (Vpr-interacting protein)	207649	215711	282171	230068	289095	209155	254992	252088	307944
NOC4L	Nucleolar complex protein 4 homolog (NOC4 protein homolog) (NOC4-like protein) (Nucleolar complex-associated protein 4-like protein)		38370.3	38227.1	39362.7	44699.3	41174	34576.1	28515.2	37981.3
ESF1	ESF1 homolog (ABT1-associated protein)	116905	131270	163513	52616.1	137013	111422	125782	138891	115270
HK1	Hexokinase-1 (EC 2.7.1.1) (Brain form hexokinase) (Hexokinase type I) (HK I) (Hexokinase-A)	658064	607906	576286	1212780	570355	602691	689646	746034	924580
TAF2	Transcription initiation factor TFIID subunit 2 (150 kDa cofactor of initiator function) (RNA polymerase II TBP-associated factor subunit B) (TBP-associated factor 150 kDa) (Transcription initiation factor TFIID 150 kDa subunit) (TAF(II)150) (TAFII-150) (TAFII150)	670671	1153750	996540	891363	1003240	1039870	865217	852057	969344
SCPEP1	#N/A	34505.8			187371			40295.2		30680.3
CEP290	#N/A	253644	187215	160397		179940	180559	193017	214778
ATP13A1	Endoplasmic reticulum transmembrane helix translocase (EC 7.4.2.-) (Endoplasmic reticulum P5A-ATPase)	159296	314302	323480	243137	280928	299095	287927	265562	305432
ARID2	AT-rich interactive domain-containing protein 2 (ARID domain-containing protein 2) (BRG1-associated factor 200) (BAF200) (Zinc finger protein with activation potential) (Zipzap/p200)	336933	496961	461261	341668	486771	403572	378581	399020	406786
SMARCA4	Transcription activator BRG1 (EC 3.6.4.-) (ATP-dependent helicase SMARCA4) (BRG1-associated factor 190A) (BAF190A) (Mitotic growth and transcription activator) (Protein BRG-1) (Protein brahma homolog 1) (SNF2-beta) (SWI/SNF-related matrix-associated actin-dependent regulator of chromatin subfamily A member 4)	946397	1357750	1254690	1018990	1189890	979737	990497	956361	1034330
ARPC4	Actin-related protein 2/3 complex subunit 4 (Arp2/3 complex 20 kDa subunit) (p20-ARC)	2428520	2633970	3356200	2687360	2431820	3430410	3914780	3813990	3539300
SLX4	Structure-specific endonuclease subunit SLX4 (BTB/POZ domain-containing protein 12)		80356.4	70204.7		39710.8	132494	142165	133126	136461
RBM12B	RNA-binding protein 12B (RNA-binding motif protein 12B)	76434.5	88364.9	123752	114073	116224	86673.4	134100	110651	99318.7
TRAM1	Translocating chain-associated membrane protein 1 (Protein TRAM1)	378411	740575	812500	1087280	698685	882245	732974	795855	769499
BCAP31	B-cell receptor-associated protein 31 (BCR-associated protein 31) (Bap31) (6C6-AG tumor-associated antigen) (Protein CDM) (p28)	80061.4	102665	132927	309715	80098	98789.6	113516	116603	102091
NSF	Vesicle-fusing ATPase (EC 3.6.4.6) (N-ethylmaleimide-sensitive fusion protein) (NEM-sensitive fusion protein) (Vesicular-fusion protein NSF)	259640	293595	327009	293676	304409	386543	468163	367277	387219
IARS1	Isoleucine--tRNA ligase, cytoplasmic (EC 6.1.1.5) (Isoleucyl-tRNA synthetase) (IRS) (IleRS)	633091	483493	524220	741593	350886	466438	493370	503517	509652
DPY19L1	#N/A	15521.9	31660.5	31793.8		45238.2	43734.6	27192.3	40999.9	20461.9
HELZ2	Helicase with zinc finger domain 2 (ATP-dependent helicase PRIC285) (Helicase with zinc finger 2, transcriptional coactivator) (PPAR-alpha-interacting complex protein 285) (PPAR-gamma DNA-binding domain-interacting protein 1) (PDIP1) (PPAR-gamma DBD-interacting protein 1) (Peroxisomal proliferator-activated receptor A-interacting complex 285 kDa protein) (EC 3.6.4.-)	356546	455111	473507	310208	474656	653912	563758	651078	606707
CLK2	Dual specificity protein kinase CLK2 (EC 2.7.12.1) (CDC-like kinase 2)	102616		88632.4	130775	65252.1	70617.1	80772.1	96759.9	66542.3
ILF3	Interleukin enhancer-binding factor 3 (Double-stranded RNA-binding protein 76) (DRBP76) (M-phase phosphoprotein 4) (MPP4) (Nuclear factor associated with dsRNA) (NFAR) (Nuclear factor of activated T-cells 90 kDa) (NF-AT-90) (Translational control protein 80) (TCP80)	14443500	11519800	10858300	8394280	10174100	9494710	9475030	7996100	7481680
RACK1	Small ribosomal subunit protein RACK1 (Cell proliferation-inducing gene 21 protein) (Guanine nucleotide-binding protein subunit beta-2-like 1) (Guanine nucleotide-binding protein subunit beta-like protein 12.3) (Human lung cancer oncogene 7 protein) (HLC-7) (Receptor for activated C kinase) (Receptor of activated protein C kinase 1) [Cleaved into: Small ribosomal subunit protein RACK1, N-terminal…	10387700	10859400	12235000	12765800	11562900	15616000	15999300	14567600	13160700
HNRNPUL1	Heterogeneous nuclear ribonucleoprotein U-like protein 1 (Adenovirus early region 1B-associated protein 5) (E1B-55 kDa-associated protein 5) (E1B-AP5)	3685370	3483100	3282960	2862740	3017740	3154240	3140920	2731500	2855930
DOCK9	#N/A		319414			365481		368026	536176	735839
RRS1	Ribosome biogenesis regulatory protein homolog	240346	325186	415277	246610	268603	268167	230147	323530	154838
MRPL38	#N/A	197418	250942	274181		259183	262082	270109	347431	347644
PIP4K2B	#N/A		55710.1	37598.6		33538	42295.6	41350.9	53430.9
SBNO2	Protein strawberry notch homolog 2	174766	279692	291491	235215	261394	277042	321043	318339	350449
STOML2	Stomatin-like protein 2, mitochondrial (SLP-2) (EPB72-like protein 2) (Paraprotein target 7) (Paratarg-7)	255962	280785	367297		262755	416195	481917	489045	399865
ATR	Serine/threonine-protein kinase ATR (EC 2.7.11.1) (Ataxia telangiectasia and Rad3-related protein) (FRAP-related protein 1)	90937.6	150275	116869		93160.1	154709	133758	138298	163198
LUC7L	#N/A	29946.4	30093.7	42937.9		29196.1	26921.2	36999	44682	40076.2
PRPF40A	Pre-mRNA-processing factor 40 homolog A (Fas ligand-associated factor 1) (Formin-binding protein 11) (Formin-binding protein 3) (Huntingtin yeast partner A) (Huntingtin-interacting protein 10) (HIP-10) (Huntingtin-interacting protein A) (Renal carcinoma antigen NY-REN-6)	1054620	1241730	1149290	901396	1201090	1139420	1080800	996643	995242
SP2	Transcription factor Sp2	61728.3	106796	105652	93714.2	90984.5	94592.4	110904	101677	70206.9
KIF2C	Kinesin-like protein KIF2C (Kinesin-like protein 6) (Mitotic centromere-associated kinesin) (MCAK)	553355	639178	581749	481627	571273	538902	468215	456872	459163
DHX36	ATP-dependent DNA/RNA helicase DHX36 (EC 3.6.4.12) (EC 3.6.4.13) (DEAD/H box polypeptide 36) (DEAH-box protein 36) (G4-resolvase-1) (G4R1) (MLE-like protein 1) (RNA helicase associated with AU-rich element protein)	378324	407517	328165	443413	434221	336482	356568	345649	355224
SEC23B	Protein transport protein Sec23B (hSec23B) (SEC23-related protein B)	474378	410296	480151	247949	461167	466525	536744	542446	498729
CEP170	Centrosomal protein of 170 kDa (Cep170) (KARP-1-binding protein) (KARP1-binding protein)		51565.9	41350.5		35675.6	71484.5	79634.5	67966.6	61411
FGD6	#N/A				1292940			21848.9	23055.5	107963
PDS5B	Sister chromatid cohesion protein PDS5 homolog B (Androgen-induced proliferation inhibitor) (Androgen-induced prostate proliferative shutoff-associated protein AS3)	83121.9	215076	209332	196219	174010	291746	290488	164064	193218
WDR76	WD repeat-containing protein 76	870016	1047010	866238	738912	1064390	738531	699740	764868	743239
GPS1	#N/A								25993.8
CHD1	Chromodomain-helicase-DNA-binding protein 1 (CHD-1) (EC 3.6.4.12) (ATP-dependent helicase CHD1)	355970	409571	385573	317993	421167	387233	320411	317124	393668
SEH1L	Nucleoporin SEH1 (GATOR complex protein SEH1) (Nup107-160 subcomplex subunit SEH1) (SEC13-like protein)	1082850	987573	1045850	1082860	1076500	1230760	1235700	1227900	1289810
EIF5B	Eukaryotic translation initiation factor 5B (eIF-5B) (EC 3.6.5.3) (Translation initiation factor IF-2)	233174	208221	201018	187181	257459	304100	315279	179747	242149
CHD1L	Chromodomain-helicase-DNA-binding protein 1-like (EC 3.6.4.-) (Amplified in liver cancer protein 1)	306147	297690	258579	202997	327502	278811	241872	314921	291093
ARHGEF1	Rho guanine nucleotide exchange factor 1 (115 kDa guanine nucleotide exchange factor) (p115-RhoGEF) (p115RhoGEF) (Sub1.5)	301880	397228	416178	225953	391696	379934	377740	430493	400058
F5	Coagulation factor V (Activated protein C cofactor) (Proaccelerin, labile factor) [Cleaved into: Coagulation factor V heavy chain; Coagulation factor V light chain]	107535	139460	97243.9	120066	87969.6	161542	207422	131102	146195
CXXC1	CXXC-type zinc finger protein 1 (CpG-binding protein) (PHD finger and CXXC domain-containing protein 1)	219322	296440	234516	286551	289806	267857	291187	300597	278735
TDRD3	#N/A	59365.1	55072.4	74336.4		71042.5	86160.6	75529.4	62151.2
RBM28	RNA-binding protein 28 (RNA-binding motif protein 28)	523424	598670	586765	387336	535263	549708	508914	465966	460748
GET4	#N/A			31502			42975.9	51668.5	57191.4	25118.1
SF3B3	Splicing factor 3B subunit 3 (Pre-mRNA-splicing factor SF3b 130 kDa subunit) (SF3b130) (STAF130) (Spliceosome-associated protein 130) (SAP 130)	3007970	4573460	4939470	4124630	4637330	4157960	3884740	3617680	3678150
INTS9	Integrator complex subunit 9 (Int9) (Protein related to CPSF subunits of 74 kDa) (RC-74)	315320	300321	297433	263518	332789	306371	336700	328644	352240
BZW1	eIF5-mimic protein 2 (Basic leucine zipper and W2 domain-containing protein 1) (Protein Orf)	215565	239565	205670	253932	189643	290861	288850	236918	242619
PCCA	Propionyl-CoA carboxylase alpha chain, mitochondrial (PCCase subunit alpha) (EC 6.4.1.3) (Propanoyl-CoA:carbon dioxide ligase subunit alpha)	168163	115983	150800	167276	103740	115762	145410	157443	117872
MYEF2	Myelin expression factor 2 (MEF-2) (MyEF-2) (MST156)	298239	367847	310046	260620	305508	335773	363285	260053	279334
RPL13A	Large ribosomal subunit protein uL13 (23 kDa highly basic protein) (60S ribosomal protein L13a)	3127440	3760940	3556010	3414110	3200310	4358560	3957650	4518540	3787150
GHITM	Growth hormone-inducible transmembrane protein (Dermal papilla-derived protein 2) (Mitochondrial morphology and cristae structure 1) (MICS1) (Transmembrane BAX inhibitor motif-containing protein 5)	172442	317044	548702	332384	409706	426700	448335	494076	508318
THOC5	THO complex subunit 5 homolog (Functional spliceosome-associated protein 79) (fSAP79) (NF2/meningioma region protein pK1.3) (Placental protein 39.2) (PP39.2) (hTREX90)	88143.1	108205	129680	233687	128602	145919	110247	121495	130127
NPLOC4	Nuclear protein localization protein 4 homolog (Protein NPL4)	37214.8	55812.8	51825.8		54820.6	46682.1	51578.5	55208.9	33480.1
CCDC86	Coiled-coil domain-containing protein 86 (Cytokine-induced protein with coiled-coil domain)	103238	71915	76847.2	161633	52111.3	65369.5	45468.8	42827.9	56031.5
ANKHD1	Ankyrin repeat and KH domain-containing protein 1 (HIV-1 Vpr-binding ankyrin repeat protein) (Multiple ankyrin repeats single KH domain) (hMASK)		46273.4	51448.2		54394	63782.1		76924.3	78270
MOV10	Helicase MOV-10 (EC 3.6.4.13) (Armitage homolog) (Moloney leukemia virus 10 protein)	278586	264528	322341	305574	343754	323116	364655	401199	428905
EP300	Histone acetyltransferase p300 (p300 HAT) (EC 2.3.1.48) (E1A-associated protein p300) (Histone butyryltransferase p300) (EC 2.3.1.-) (Histone crotonyltransferase p300) (EC 2.3.1.-) (Protein 2-hydroxyisobutyryltransferase p300) (EC 2.3.1.-) (Protein lactyltransferas p300) (EC 2.3.1.-) (Protein propionyltransferase p300) (EC 2.3.1.-)	588484	671137	671551	593746	736728	747257	716038	735968	721803
RDX	Radixin	120310	92451.5	123917	126250	116509	90968.1	127658	101481	148131
CCT4	T-complex protein 1 subunit delta (TCP-1-delta) (CCT-delta) (Stimulator of TAR RNA-binding)	1468440	1397940	1389350	1331290	1434850	1653970	1747950	1869440	1773820
INTS11	Integrator complex subunit 11 (Int11) (EC 3.1.27.-) (Cleavage and polyadenylation-specific factor 3-like protein) (CPSF3-like protein) (Protein related to CPSF subunits of 68 kDa) (RC-68)	543902	462520	408270	370930	546402	528083	523155	478750	559470
ANKRD17	Ankyrin repeat domain-containing protein 17 (Gene trap ankyrin repeat protein) (Serologically defined breast cancer antigen NY-BR-16)	107460	131800	137855	148388	135629	168523	166448	173396	195332
RDH12	#N/A		32479	36705.4	79029.5	29910.8	40168.6	47760	42973.2	18307.6
LRPPRC	Leucine-rich PPR motif-containing protein, mitochondrial (130 kDa leucine-rich protein) (LRP 130) (GP130)	190948	169693	175988	234743	137830	212004	205019	210281	173833
MKRN2	E3 ubiquitin-protein ligase makorin-2 (EC 2.3.2.27) (RING finger protein 62) (RING-type E3 ubiquitin transferase makorin-2)	146428	115120	133710	117538	136283	143269	115077	166073	147947
TTLL12	Tubulin--tyrosine ligase-like protein 12 (Inactive tubulin--tyrosine ligase-like protein 12)	267545	184468	151302	345447	217195	176054	145241	217915	242309
PCBP1	Poly(rC)-binding protein 1 (Alpha-CP1) (Heterogeneous nuclear ribonucleoprotein E1) (hnRNP E1) (Nucleic acid-binding protein SUB2.3)	2383810	2422430	2246440	2373090	2384420	2704650	2858990	2665080	2737980
ZNF143	Zinc finger protein 143 (SPH-binding factor) (Selenocysteine tRNA gene transcription-activating factor) (hStaf)	155378	240826	229057	445938	220925	268590	246604	213289	249780
AHDC1	#N/A		18836.5	17906.5		41896.4	38124.6	37180.4
IPO7	Importin-7 (Imp7) (Ran-binding protein 7) (RanBP7)	99903.8	111159	106404	131446	98017.7	122508	151540	100469	111106
NUP93	Nuclear pore complex protein Nup93 (93 kDa nucleoporin) (Nucleoporin Nup93)	1118250	1081170	1106330	850365	1214430	1240100	1317150	1374140	1281330
NDUFB10	#N/A				97504.4
UQCR10	#N/A	104803	82044.3	103544	39391.3	49865.1	86137.1		96314.9	98559.2
ACLY	ATP-citrate synthase (EC 2.3.3.8) (ATP-citrate (pro-S-)-lyase) (ACL) (Citrate cleavage enzyme)	641013	501343	531199	557350	555030	477312	507702	537946	462184
ELP1	Elongator complex protein 1 (ELP1) (IkappaB kinase complex-associated protein) (IKK complex-associated protein) (p150)	398347	375159	389810	375111	418161	524787	522033	574368	593644
CHD7	Chromodomain-helicase-DNA-binding protein 7 (CHD-7) (EC 3.6.4.12) (ATP-dependent helicase CHD7)	95541.3	110555	83019.9	89986.3	123020	91750.1	102330	99827.8	118856
TBL2	Transducin beta-like protein 2 (WS beta-transducin repeats protein) (WS-betaTRP) (Williams-Beuren syndrome chromosomal region 13 protein)	39755.6	43112.8	42486.2		63836	40356.8	47079.7	49746.1	63935.4
HMOX2	#N/A					29305.7	41642.6	60402.2	42391.5	58131.5
ZNF318	Zinc finger protein 318 (Endocrine regulatory protein)		226663	318395	205824	236958	215589	94741.2	196659	178131
CDK1	Cyclin-dependent kinase 1 (CDK1) (EC 2.7.11.22) (EC 2.7.11.23) (Cell division control protein 2 homolog) (Cell division protein kinase 1) (p34 protein kinase)	317535	342447	328473	285924	322761	345238	399175	421297	397103
USP16	Ubiquitin carboxyl-terminal hydrolase 16 (EC 3.4.19.12) (Deubiquitinating enzyme 16) (Ubiquitin thioesterase 16) (Ubiquitin-processing protease UBP-M) (Ubiquitin-specific-processing protease 16)	69624.2	69973	82859.7		77293	84244.4	90395.9	121419	83127.2
SRSF3	Serine/arginine-rich splicing factor 3 (Pre-mRNA-splicing factor SRP20) (Splicing factor, arginine/serine-rich 3)	3647050	2591440	2364380	3011610	2175890	2582540	2425210	2246670	2392270
ZNF451	E3 SUMO-protein ligase ZNF451 (EC 2.3.2.-) (Coactivator for steroid receptors) (E3 SUMO-protein transferase ZNF451) (Zinc finger protein 451)	56915.2	314181	212476	191564	277674	245983	211236	274009	307936
NSDHL	#N/A		98434.4	106215	144917		97784.6	63202.9	98717.8	77345.7
HDLBP	Vigilin (High density lipoprotein-binding protein) (HDL-binding protein)	177488	189428	189018	179842	169251	244446	241858	249940	268486
QARS1	Glutamine--tRNA ligase (EC 6.1.1.18) (Glutaminyl-tRNA synthetase) (GlnRS)	349858	315780	258260	557581	287506	297388	316699	262582	355016
ERMP1	Endoplasmic reticulum metallopeptidase 1 (EC 3.4.-.-) (Felix-ina)	50133.8	69705.1	92105.5	108139	55602.4	89018.9	111880	70377.9	82025.2
EFTUD2	116 kDa U5 small nuclear ribonucleoprotein component (Elongation factor Tu GTP-binding domain-containing protein 2) (SNU114 homolog) (hSNU114) (U5 snRNP-specific protein, 116 kDa) (U5-116 kDa)	5248620	5619130	5910820	5180460	6070620	5622350	5208810	5040540	5293320
NRF1	Nuclear respiratory factor 1 (NRF-1) (Alpha palindromic-binding protein) (Alpha-pal)	67425.3	130128	79857.2	110074	114419	143524	156428	134015	90249.3
MRPL39	#N/A		52341.3	113321	73413.8	74541.6	115725	131650	114743	86599.1
EIF3A	Eukaryotic translation initiation factor 3 subunit A (eIF3a) (Eukaryotic translation initiation factor 3 subunit 10) (eIF-3-theta) (eIF3 p167) (eIF3 p180) (eIF3 p185)	356482	594907	571883	508837	548702	582658	533886	450688	440019
CDT1	#N/A	115440	94238.2	58351.3	89299.1	98182.8	59546		59896.5	139100
TRAP1	Heat shock protein 75 kDa, mitochondrial (HSP 75) (TNFR-associated protein 1) (Tumor necrosis factor type 1 receptor-associated protein) (TRAP-1)	8367730	9354960	8326440	8300350	7430530	10240400	11680700	11338900	10593700
WWP2	NEDD4-like E3 ubiquitin-protein ligase WWP2 (EC 2.3.2.26) (Atrophin-1-interacting protein 2) (AIP2) (HECT-type E3 ubiquitin transferase WWP2) (WW domain-containing protein 2)	194100	200516	213531	90742.9	197242	183561	180516	192384	198742
TXNIP	#N/A							62177.8
VPS11	Vacuolar protein sorting-associated protein 11 homolog (hVPS11) (RING finger protein 108)	62696.8	62887	91770.7	76650.3	98543.6	105250	126379	147213	130252
RRAGC;RRAGD	Ras-related GTP-binding protein C (Rag C) (RagC) (EC 3.6.5.-) (GTPase-interacting protein 2) (TIB929)	35771.1	90948.4	84480.7	60769.8	91305	121529	103983	147761	99402.8
MPG	DNA-3-methyladenine glycosylase (EC 3.2.2.21) (3-alkyladenine DNA glycosylase) (3-methyladenine DNA glycosidase) (ADPG) (N-methylpurine-DNA glycosylase)	291203	258706	265628	153611	304019	283539	234982	289241	263473
RPL34	Large ribosomal subunit protein eL34 (60S ribosomal protein L34)	2747690	4018990	3559830	2315590	2632040	3889980	3470130	4556360	2521470
VCPIP1	Deubiquitinating protein VCPIP1 (EC 3.4.19.12) (Valosin-containing protein p97/p47 complex-interacting protein 1) (Valosin-containing protein p97/p47 complex-interacting protein p135) (VCP/p47 complex-interacting 135-kDa protein)	149422	155089	141133	111746	159918	177200	168424	179958	230681
NKTR	NK-tumor recognition protein (NK-TR protein) (Natural-killer cells cyclophilin-related protein) (Peptidyl-prolyl cis-trans isomerase NKTR) (PPIase) (EC 5.2.1.8) (Rotamase)	182208	204557	192751	170252	152891	297839	240164	295914	216214
KIF20B	Kinesin-like protein KIF20B (Cancer/testis antigen 90) (CT90) (Kinesin family member 20B) (Kinesin-related motor interacting with PIN1) (M-phase phosphoprotein 1) (MPP1)	371074	361617	394825	536895	377990	326695	268511	300626	279615
LONP1	Lon protease homolog, mitochondrial (EC 3.4.21.53) (LONHs) (Lon protease-like protein) (LONP) (Mitochondrial ATP-dependent protease Lon) (Serine protease 15)	46131.8	67704.9	67547	77254.8	76252.8	62071.2	85058.2	82863	100790
HSD17B11	#N/A	118101	133305	85151.8		92706.9	165847	166582	128390	126845
PDCD11	Protein RRP5 homolog (NF-kappa-B-binding protein) (NFBP) (Programmed cell death protein 11)	986256	1317920	1318460	993997	1241670	931035	993005	815422	803824
CFAP97	#N/A		140664	221390	78991.9	50052.8	103294	118106
ZNF668	Zinc finger protein 668	161463	229891	249118		253236	222685	236887	212902	219507
U2AF2	Splicing factor U2AF 65 kDa subunit (U2 auxiliary factor 65 kDa subunit) (hU2AF(65)) (hU2AF65) (U2 snRNP auxiliary factor large subunit)	2541020	2543890	2405660	1883270	2431470	2461840	1743740	2101840	1836320
ZNF675	#N/A	182003	124443	156150	55286.9	133607	60021.2	104718	101862	84293.4
RANGAP1	Ran GTPase-activating protein 1 (RanGAP1)	177806	2312100	2701130	3158390	3623120	1774640	1612570	1757860	2186870
SLC25A15	Mitochondrial ornithine transporter 1 (Solute carrier family 25 member 15)	31151.1		46074	28897.3	36070.9	26178.4	33068.8		37027.2
SPR	Sepiapterin reductase (SPR) (EC 1.1.1.153)	556562	392393	365640	677514	387295	384148	355796	287776	431569
SHMT2	Serine hydroxymethyltransferase, mitochondrial (SHMT) (EC 2.1.2.1) (Glycine hydroxymethyltransferase) (Serine methylase)	1065070	1015940	993642	831490	921729	973778	967974	930834	909314
LANCL1	Glutathione S-transferase LANCL1 (EC 2.5.1.18) (40 kDa erythrocyte membrane protein) (p40) (LanC-like protein 1)			39107.4	189560		48945.7	79423.9
NCAPD2	Condensin complex subunit 1 (Chromosome condensation-related SMC-associated protein 1) (Chromosome-associated protein D2) (hCAP-D2) (Non-SMC condensin I complex subunit D2) (XCAP-D2 homolog)	160310	129232	116118	147542	148141	104338	139988	115970	204765
PCID2	PCI domain-containing protein 2 (CSN12-like protein)	153938	202834	185332	148409	185657	212315	159521	216186	191669
TRMT2A	tRNA (uracil-5-)-methyltransferase homolog A (EC 2.1.1.35) (mRNA (uracil-5-)-methyltransferase TRMT2A) (EC 2.1.1.-)	537953	443566	379913	324105	452270	475703	465791	461986	432432
BAZ1B	Tyrosine-protein kinase BAZ1B (EC 2.7.10.2) (Bromodomain adjacent to zinc finger domain protein 1B) (Williams syndrome transcription factor) (Williams-Beuren syndrome chromosomal region 10 protein) (Williams-Beuren syndrome chromosomal region 9 protein) (hWALp2)	919157	1792440	1830540	1187700	1690760	1464860	1197520	1227890	1105260
ZSCAN25	Zinc finger and SCAN domain-containing protein 25 (Zinc finger protein 498)		263147	296291	166740	175948	142238	154624	66360.1	124686
PLG	Plasminogen (EC 3.4.21.7) [Cleaved into: Plasmin heavy chain A; Activation peptide; Angiostatin; Plasmin heavy chain A, short form; Plasmin light chain B]	1274050	946118	799130	1233990	732176	815796	834417	725564	937640
GALK1	Galactokinase (EC 2.7.1.6) (Galactose kinase)	720337	611473	719827	431913	679567	704569	558330	852881	962230
MOCS3	#N/A	23061	56773.7	42405		62252.5	63469.5	57571.1	66969.9
HSPA4	Heat shock 70 kDa protein 4 (HSP70RY) (Heat shock 70-related protein APG-2)	287476	385155	454165	492571	436899	331192	336832	312944	332812
MGA	MAX dimerization protein MGA		2907490	3430040	1931550	2285750	1710080	1396870	1244060	1033530
	MAX gene-associated protein (MAX dimerization protein 5)	384563	5848540	6460210	3812250	4293350	3052010	2729020	2243890	1956870
ZKSCAN1	#N/A			120297	71495.5	140081
PFAS	Phosphoribosylformylglycinamidine synthase (FGAM synthase) (FGAMS) (EC 6.3.5.3) (Formylglycinamide ribonucleotide amidotransferase) (FGAR amidotransferase) (FGAR-AT) (Formylglycinamide ribotide amidotransferase) (Phosphoribosylformylglycineamide amidotransferase)	175046	150471	147556	243529	146626	110182	184854	144636	125084
SEC61A1	Protein transport protein Sec61 subunit alpha isoform 1 (Sec61 alpha-1)	1412420	1854880	1823940	2407110	1502580	2243330	2393450	1791690	1958270
ZNF24	#N/A		74436.2	39544.2	39597.6	42336.1	47477.8	38003.8	33097.3
CIZ1	#N/A			37208.9	351517			25796.3	36152.2	52885.4
SRSF7	Serine/arginine-rich splicing factor 7 (Splicing factor 9G8) (Splicing factor, arginine/serine-rich 7)	1267800	857288	1093830	1036200	849195	1074310	1086050	1099610	1016620
VPS13A	Intermembrane lipid transfer protein VPS13A (Chorea-acanthocytosis protein) (Chorein) (Vacuolar protein sorting-associated protein 13A)	2842360	1896900	1795610	2272550	1315550	1862970	1599810	1431600	1762740
CNP	2',3'-cyclic-nucleotide 3'-phosphodiesterase (CNP) (CNPase) (EC 3.1.4.37)	556044	448186	496382	511452	509057	520938	567633	724867	686954
ADD3	Gamma-adducin (Adducin-like protein 70)	365184	480249	451425	727068	387124	480852	556890	427332	488513
POLR3E	DNA-directed RNA polymerase III subunit RPC5 (RNA polymerase III subunit C5) (DNA-directed RNA polymerase III 80 kDa polypeptide)	279126	444864	540729	364042	377154	407871	418315	299737	389466
KRI1	Protein KRI1 homolog	206543	299409	328126	317685	309862	253829	267386	235826	218467
SMC5	Structural maintenance of chromosomes protein 5 (SMC protein 5) (SMC-5) (hSMC5)	314565	2026430	1999130	1662190	1900190	4328670	3917430	4687910	5094680
RFX7	#N/A		72510.4		107487	66658.1	70557.2		75147.9
TUBA4A	Tubulin alpha-4A chain (EC 3.6.5.-) (Alpha-tubulin 1) (Testis-specific alpha-tubulin) (Tubulin H2-alpha) (Tubulin alpha-1 chain)	14439800	12806100	14673500	13706300	14658100	15759700	15997400	19254600	18444500
ARAP1	Arf-GAP with Rho-GAP domain, ANK repeat and PH domain-containing protein 1 (Centaurin-delta-2) (Cnt-d2)	274237	332730	343569	247931	337206	424283	403686	409102	502085
MGAT1	Alpha-1,3-mannosyl-glycoprotein 2-beta-N-acetylglucosaminyltransferase (EC 2.4.1.101) (N-glycosyl-oligosaccharide-glycoprotein N-acetylglucosaminyltransferase I) (GNT-I) (GlcNAc-T I)	16333.5	94413.6	111059	208301	125399	102200	80579.7	123205	130349
DHRS1	Dehydrogenase/reductase SDR family member 1 (EC 1.1.1.-) (Short chain dehydrogenase/reductase family 19C member 1) (Protein SDR19C1)	130141	122419	119876	205212	140620	161526	196489	129375	116936
SLC25A3	Solute carrier family 25 member 3 (Phosphate carrier protein, mitochondrial) (Phosphate transport protein) (PTP)	4051870	5463880	7537190	5881530	5109030	4908800	5032530	6213320	5040930
HSPA1A;HSPA1B	Heat shock 70 kDa protein 1A (Heat shock 70 kDa protein 1) (HSP70-1) (HSP70.1)	883623	592215	550012	2018510	465156	587279	568413	484027	592178
ZBTB4	Zinc finger and BTB domain-containing protein 4 (KAISO-like zinc finger protein 1) (KAISO-L1)		823996	830775	685356	786925	566607	500058	551053	632320
ARHGEF2	Rho guanine nucleotide exchange factor 2 (Guanine nucleotide exchange factor H1) (GEF-H1) (Microtubule-regulated Rho-GEF) (Proliferating cell nucleolar antigen p40)	427935	635159	640981	445487	500626	509584	471906	424111	413291
SLTM	SAFB-like transcription modulator (Modulator of estrogen-induced transcription)	586600	554225	590928	447684	453263	380680	351528	315616	355082
UTP18	U3 small nucleolar RNA-associated protein 18 homolog (WD repeat-containing protein 50)	993273	1332610	1333810	1032650	1407750	1080880	1035910	1040260	955403
MDH2	Malate dehydrogenase, mitochondrial (EC 1.1.1.37)	539117	401973	337940	1158170	283001	369020	378728	319936	340747
DDX23	Probable ATP-dependent RNA helicase DDX23 (EC 3.6.4.13) (100 kDa U5 snRNP-specific protein) (DEAD box protein 23) (PRP28 homolog) (U5-100kD)	631827	845519	824649	830109	736362	882979	804744	723563	688980
UPF1	Regulator of nonsense transcripts 1 (EC 3.6.4.12) (EC 3.6.4.13) (ATP-dependent helicase RENT1) (Nonsense mRNA reducing factor 1) (NORF1) (Up-frameshift suppressor 1 homolog) (hUpf1)	540624	525122	559659	846640	542587	677583	727487	662604	716007
GSN	Gelsolin (AGEL) (Actin-depolymerizing factor) (ADF) (Brevin)	710961	531208	465197	3721810	490233	574636	534448	467926	567308
USP42	Ubiquitin carboxyl-terminal hydrolase 42 (EC 3.4.19.12) (Deubiquitinating enzyme 42) (Ubiquitin thioesterase 42) (Ubiquitin-specific-processing protease 42)	290279	209357	125039	196219	150554	152799	123529	130930	129747
DCTN4	Dynactin subunit 4 (Dyn4) (Dynactin subunit p62)	147381	153142	141007	124726	143578	155877	144936	134857	173875
TMEM160	Transmembrane protein 160	327970	408259	566091	397708	452437	493926	550586	615950	656088
GLB1	#N/A				43784.2		26004.9
SEC11C	Signal peptidase complex catalytic subunit SEC11C (EC 3.4.21.89) (Microsomal signal peptidase 21 kDa subunit) (SPase 21 kDa subunit) (SEC11 homolog C) (SEC11-like protein 3) (SPC21)	79438.4	78064.5	90773.5	91039.6	79155.6	81135	75298.8	83283.1	79205.4
SCRIB	Protein scribble homolog (Scribble) (hScrib) (Protein LAP4)	110700	105624	77651.9	113138	86209.5	101087	126535	139607	152148
	#N/A	59350.7	78529.4	58961.7	18194.1	67423.5	38359.8	46759.8	56153.2	52974.2
TMX2	Thioredoxin-related transmembrane protein 2 (Cell proliferation-inducing gene 26 protein) (Thioredoxin domain-containing protein 14)	86508.7	120072	164723	97111.6	96432.4	156219	126383	135881	117951
BAZ2A	Bromodomain adjacent to zinc finger domain protein 2A (Transcription termination factor I-interacting protein 5) (TTF-I-interacting protein 5) (Tip5) (hWALp3)	215140	949121	821446	559547	764386	528547	511353	565484	576369
TM9SF1	Transmembrane 9 superfamily member 1 (MP70 protein family member) (hMP70)			26949.1	45196.9	19589.9	19711.1	52551	19199.7
CORO1B	Coronin-1B (Coronin-2)	783952	1020480	1151310	1014900	977953	1103440	1421530	1549700	1540130
YBX3	Y-box-binding protein 3 (Cold shock domain-containing protein A) (DNA-binding protein A) (Single-strand DNA-binding protein NF-GMB)	115347	172657	173069	218513	102719	127050		138869	109815
ZNF219	#N/A			111548	148411	76397.6	87345.9	82477.5	92301
PES1	Pescadillo homolog	757260	1121860	1130030	843363	1000060	989754	961486	940207	770844
AMMECR1	#N/A	93228.5	100433	105740		108418	141729	113711		130399
TOP2A	DNA topoisomerase 2-alpha (EC 5.6.2.2) (DNA topoisomerase II, alpha isozyme)	6838260	9685850	9519390	7431360	8655810	7574100	7892380	6584110	7393970
PALS2	#N/A			38453.2		53580.8		57597.3	59060.2	56609.3
USP7	Ubiquitin carboxyl-terminal hydrolase 7 (EC 3.4.19.12) (Deubiquitinating enzyme 7) (Herpesvirus-associated ubiquitin-specific protease) (Ubiquitin thioesterase 7) (Ubiquitin-specific-processing protease 7)	601650	702231	719244	838231	672057	717522	691023	583862	636390
AZGP1	Zinc-alpha-2-glycoprotein (Zn-alpha-2-GP) (Zn-alpha-2-glycoprotein)	1156910	854319	860941	11071800	793769	946117	811303	835643	802685
FAM83H	#N/A				61846.8
ACTB	Actin beta	139784	86481	88991.5	148838	67574.6	105119	87383.4	77339.4	98698.5
	Actin, cytoplasmic 1 (EC 3.6.4.-) (Beta-actin) [Cleaved into: Actin, cytoplasmic 1, N-terminally processed]	44593500	64036300	66584300	90587900	61167400	84138800	86539400	81112500	93484700
	#N/A		47748.3	66815.3		67445.7	82494.5	116062	106780
ACTR1A	Alpha-centractin (Centractin) (ARP1) (Actin-RPV) (Centrosome-associated actin homolog)	278229	242662	233106	302723	216433	267293	284738	281139	298790
ACY1	#N/A				125802
DNAJC11	DnaJ homolog subfamily C member 11	772356	780462	1075940	914043	964921	958042	1297680	1160730	1175220
XIAP	E3 ubiquitin-protein ligase XIAP (EC 2.3.2.27) (Baculoviral IAP repeat-containing protein 4) (IAP-like protein) (ILP) (hILP) (Inhibitor of apoptosis protein 3) (IAP-3) (hIAP-3) (hIAP3) (RING-type E3 ubiquitin transferase XIAP) (X-linked inhibitor of apoptosis protein) (X-linked IAP)	141308	69631.8	115404	79402.5	117055	108187	95199.3	150201	149000
PTPN6	Tyrosine-protein phosphatase non-receptor type 6 (EC 3.1.3.48) (Hematopoietic cell protein-tyrosine phosphatase) (Protein-tyrosine phosphatase 1C) (PTP-1C) (Protein-tyrosine phosphatase SHP-1) (SH-PTP1)	872707	1047640	1043990	948921	1053240	1418790	1324270	1305460	1237500
IQSEC1	IQ motif and SEC7 domain-containing protein 1 (ADP-ribosylation factors guanine nucleotide-exchange protein 100) (ADP-ribosylation factors guanine nucleotide-exchange protein 2) (Brefeldin-resistant Arf-GEF 2 protein) (BRAG2)	147575	115205	82732.9	114438	110060	158553	100531	179562	117123
SYNGR1	Synaptogyrin-1			34652	198270				12463.8
IRF2BP1	Interferon regulatory factor 2-binding protein 1 (IRF-2-binding protein 1) (IRF-2BP1) (Probable E3 ubiquitin-protein ligase IRF2BP1) (EC 2.3.2.27) (Probable RING-type E3 ubiquitin transferase IRF2BP1)		63959.7	18198.4	95354.4	41797.3	58137.9	82566	30754.8	42251.7
PGAM5	Serine/threonine-protein phosphatase PGAM5, mitochondrial (EC 3.1.3.16) (Bcl-XL-binding protein v68) (Phosphoglycerate mutase family member 5)	257928	255376	288884	291874	257773	329737	363165	401644	335574
NEK9	Serine/threonine-protein kinase Nek9 (EC 2.7.11.1) (Nercc1 kinase) (Never in mitosis A-related kinase 9) (NimA-related protein kinase 9) (NimA-related kinase 8) (Nek8)	141219	140023	115745	108909	138070	162111	150602	182555	170829
DCAF7	DDB1- and CUL4-associated factor 7 (WD repeat-containing protein 68) (WD repeat-containing protein An11 homolog)	152132	187486	189813	175118	206498	162759	213546	205004	245132
HSPH1	Heat shock protein 105 kDa (Antigen NY-CO-25) (Heat shock 110 kDa protein)	289125	303031	358372	453421	367455	462530	362705	474916	486798
GASK1B	#N/A		79051					81671.8
ZSCAN18	#N/A	375888	406301	359226	487651	326328	393755	393782	351165	400182
LMNB1	Lamin-B1	3283420	4925910	4762240	3959810	4401760	4310080	4223200	4478000	4778590
TMEM223	#N/A			100618			87814.4	110009	120054	128333
ATAD2B	ATPase family AAA domain-containing protein 2B	127233	365013	229402	233867	268981	214774	214769	195250	178594
ARHGEF18	#N/A	36480.4	67440.5	55431.1	90689.7	71448.6	77253.4	89184.4	74154	92274.5
DNAJB12	#N/A				72813			50365.5		65071.2
MLLT1	Protein ENL (YEATS domain-containing protein 1)	94837.8	150678	122713		140007	116751	125135	135097	155502
CYBC1	Cytochrome b-245 chaperone 1 (Essential for reactive oxygen species protein) (Eros)	501453	480485	517026	421300	366108	648381	498780	499654	456622
NSUN5	28S rRNA (cytosine-C(5))-methyltransferase (EC 2.1.1.-) (NOL1-related protein) (NOL1R) (NOL1/NOP2/Sun domain family member 5) (Williams-Beuren syndrome chromosomal region 20A protein)	138450	180723	107667	160867	176179	116058	133683	131184	117401
MAN1A2	#N/A							38798.9	14800.4
ZNF148	Zinc finger protein 148 (Transcription factor ZBP-89) (Zinc finger DNA-binding protein 89)		717597	837924	701466	560671	415505	454259	356299	401831
PRPF4	U4/U6 small nuclear ribonucleoprotein Prp4 (PRP4 homolog) (hPrp4) (U4/U6 snRNP 60 kDa protein) (WD splicing factor Prp4)	1100060	1119280	1183230	989475	1157810	1038470	1053160	1063670	1092130
MTMR3	Myotubularin-related protein 3 (EC 3.1.3.48) (FYVE domain-containing dual specificity protein phosphatase 1) (FYVE-DSP1) (Phosphatidylinositol-3,5-bisphosphate 3-phosphatase) (EC 3.1.3.95) (Phosphatidylinositol-3-phosphate phosphatase) (EC 3.1.3.64) (Zinc finger FYVE domain-containing protein 10)	185310	174125	176558	139872	176633	222979	220865	247322	297329
COX6C	Cytochrome c oxidase subunit 6C (Cytochrome c oxidase polypeptide VIc)	67330.6	53095.3		146356	51580.6		75474.6	71080.1	96114.4
RNASEH1	Ribonuclease H1 (RNase H1) (EC 3.1.26.4) (Ribonuclease H type II)	102476		86599.9		117758	81565.9	48766	90789.8
MCM7	DNA replication licensing factor MCM7 (EC 3.6.4.12) (CDC47 homolog) (P1.1-MCM3)	3327780	3409800	3285140	3424600	4059860	3163250	2911090	3562250	3766370
AHCY	Adenosylhomocysteinase (AdoHcyase) (EC 3.13.2.1) (S-adenosyl-L-homocysteine hydrolase)	2561940	2228230	2100570	6796390	1914820	2407850	2662950	1977260	2411340
CUL1	Cullin-1 (CUL-1)	544155	517001	508596	499708	539489	548079	526506	555498	559671
GTF2I	General transcription factor II-I (GTFII-I) (TFII-I) (Bruton tyrosine kinase-associated protein 135) (BAP-135) (BTK-associated protein 135) (SRF-Phox1-interacting protein) (SPIN) (Williams-Beuren syndrome chromosomal region 6 protein)	194378	1685690	1909680	1451490	1305210	1051500	928858	813687	903999
MCM5	DNA replication licensing factor MCM5 (EC 3.6.4.12) (CDC46 homolog) (P1-CDC46)	13868300	12822600	12706600	10868100	13946300	12802700	13009800	13791400	13217100
SLC25A13	Electrogenic aspartate/glutamate antiporter SLC25A13, mitochondrial (Calcium-binding mitochondrial carrier protein Aralar2) (ARALAR-related gene 2) (ARALAR2) (Citrin) (Mitochondrial aspartate glutamate carrier 2) (Solute carrier family 25 member 13)	207132	146725	202910	249308	148499	172888	190615	138359	177940
RPS15A	Small ribosomal subunit protein uS8 (40S ribosomal protein S15a)	10699700	9176580	10313900	8073680	9620530	14142600	12860400	13225800	12728500
MYO6	#N/A	59685.8		24789.9	89052.3
KRT15	#N/A				200215
PRMT6	Protein arginine N-methyltransferase 6 (EC 2.1.1.319) (Heterogeneous nuclear ribonucleoprotein methyltransferase-like protein 6) (Histone-arginine N-methyltransferase PRMT6)	289059	294224	122882		128853	236221	98864.7	160332	291901
DKC1	H/ACA ribonucleoprotein complex subunit DKC1 (EC 5.4.99.-) (CBF5 homolog) (Dyskerin) (Nopp140-associated protein of 57 kDa) (Nucleolar protein NAP57) (Nucleolar protein family A member 4) (snoRNP protein DKC1)	6737830	8477640	7704850	5768710	7430740	6904210	6870320	6391900	6742630
ACADVL	Very long-chain specific acyl-CoA dehydrogenase, mitochondrial (VLCAD) (EC 1.3.8.9)	182104	156944	141384	1083740	111211	174182	156576	109270	152059
NOA1	Nitric oxide-associated protein 1			39923.6		6566.83			16649.3	69653.1
CCAR1	Cell division cycle and apoptosis regulator protein 1 (Cell cycle and apoptosis regulatory protein 1) (CARP-1) (Death inducer with SAP domain)	1416510	1654780	1539820	1222350	1451230	1428030	1338580	1335870	1429970
EMG1	Ribosomal RNA small subunit methyltransferase NEP1 (EC 2.1.1.-) (18S rRNA (pseudouridine(1248)-N1)-methyltransferase) (18S rRNA Psi1248 methyltransferase) (Nucleolar protein EMG1 homolog) (Protein C2f) (Ribosome biogenesis protein NEP1)	3804070	4278930	4234780	4889960	4299570	3698030	3467370	3114160	3067810
VPS33B	Vacuolar protein sorting-associated protein 33B (hVPS33B)	203871	203673	209540	175319	205270	221754	243068	295469	278432
WRNIP1	ATPase WRNIP1 (EC 3.6.1.-) (Werner helicase-interacting protein 1)	788459	975060	866632	642970	961030	872959	813404	981764	955791
PIGT	GPI transamidase component PIG-T (Phosphatidylinositol-glycan biosynthesis class T protein)	317790	320049	289061	361956	341007	402869	358772	431221	387775
ITPR3	Inositol 1,4,5-trisphosphate receptor type 3 (IP3 receptor isoform 3) (IP3R 3) (InsP3R3) (Type 3 inositol 1,4,5-trisphosphate receptor) (Type 3 InsP3 receptor)	93887.6	116217	135081	128918	140226	157841	176180	139301	124817
RPL7	Large ribosomal subunit protein uL30 (60S ribosomal protein L7)	2806100	3264810	3490610	2672250	2938360	3852720	3630960	3856810	3738990
PDE4DIP	#N/A	78625.4	135292	88365.2	167241	140330	70114.4	74645.2	72600.6	56564.2
TAOK3	Serine/threonine-protein kinase TAO3 (EC 2.7.11.1) (Cutaneous T-cell lymphoma-associated antigen HD-CL-09) (CTCL-associated antigen HD-CL-09) (Dendritic cell-derived protein kinase) (JNK/SAPK-inhibitory kinase) (Jun kinase-inhibitory kinase) (Kinase from chicken homolog A) (hKFC-A) (Thousand and one amino acid protein 3)	91992	85861.4	100964	70313.9	68499.5	153311	120811	117828	135211
RPL22	Large ribosomal subunit protein eL22 (60S ribosomal protein L22) (EBER-associated protein) (EAP) (Epstein-Barr virus small RNA-associated protein) (Heparin-binding protein HBp15)	3018920	2832450	2934540	3008030	2255840	3678910	3252940	3357720	3673420
MED14	Mediator of RNA polymerase II transcription subunit 14 (Activator-recruited cofactor 150 kDa component) (ARC150) (Cofactor required for Sp1 transcriptional activation subunit 2) (CRSP complex subunit 2) (Mediator complex subunit 14) (RGR1 homolog) (hRGR1) (Thyroid hormone receptor-associated protein complex 170 kDa component) (Trap170) (Transcriptional coactivator CRSP150) (Vitamin D3 receptor-in…	74175.9	70993.2	78793.4	66225.4	84542.6	98700.1	96674.2	98864.6	98409.5
MTA1	Metastasis-associated protein MTA1	587484	935554	904701	833675	928448	906008	787175	730974	743877
FXR2	RNA-binding protein FXR2 (FXR2P) (FMR1 autosomal homolog 2)		75783.8	83360.7	44609.2	105044	89718.2	118942	59034.1	132612
SYNCRIP	Heterogeneous nuclear ribonucleoprotein Q (hnRNP Q) (Glycine- and tyrosine-rich RNA-binding protein) (GRY-RBP) (NS1-associated protein 1) (Synaptotagmin-binding, cytoplasmic RNA-interacting protein)	2073670	1687700	2003570	1542440	2045480	1460380	1617100	1277270	1223650
MRPL15	Large ribosomal subunit protein uL15m (39S ribosomal protein L15, mitochondrial) (L15mt) (MRP-L15)	49316.7	92147.5	81543.7	83095.8	65189.2	78877.3	97768.8	118322	70448.3
GTPBP2	#N/A		20953.5	23268.3		13874.9	19504.2		28075.8
MPHOSPH8	M-phase phosphoprotein 8 (Two hybrid-associated protein 3 with RanBPM) (Twa3)	150492	154435	198936	173190	161353	207269	193357	200048	210528
DCP1A	mRNA-decapping enzyme 1A (EC 3.6.1.62) (Smad4-interacting transcriptional co-activator) (Transcription factor SMIF)	19330.2	16111	31964.4		35366.3	47473.6	37384.9	49293.1	64052.5
GIT2	#N/A	57423	56943.6	56666.5	43680.7	49352.4	88580.1	79592.5	72856.3	61868.4
ANAPC1	Anaphase-promoting complex subunit 1 (APC1) (Cyclosome subunit 1) (Mitotic checkpoint regulator) (Testis-specific gene 24 protein)	119116	158154	147329	138327	175266	155036	177477	158195	165250
NFRKB	Nuclear factor related to kappa-B-binding protein (DNA-binding protein R kappa-B) (INO80 complex subunit G)		566898	612813	373613	496102	350205	329041	299731	332314
MYO18A	Unconventional myosin-XVIIIa (Molecule associated with JAK3 N-terminus) (MAJN) (Myosin containing a PDZ domain) (Surfactant protein receptor SP-R210) (SP-R210)	137586	142417	156378	131972	168238	159686	165106	140613	152809
BCOR	BCL-6 corepressor (BCoR)		214168	126815	91902.8	139532	72437.7	112803
SPTY2D1	Protein SPT2 homolog (Protein KU002155) (SPT2 domain-containing protein 1)	76289.1	89877	54263.5		37615.1	83822.1	77356.8		87891.9
WNK2	#N/A				108589
STT3B	Dolichyl-diphosphooligosaccharide--protein glycosyltransferase subunit STT3B (Oligosaccharyl transferase subunit STT3B) (STT3-B) (EC 2.4.99.18) (Source of immunodominant MHC-associated peptides homolog)	606783	1147980	1175130	1092860	1028630	1039090	808412	928530	756273
UQCRC2	Cytochrome b-c1 complex subunit 2, mitochondrial (Complex III subunit 2) (Core protein II) (Ubiquinol-cytochrome-c reductase complex core protein 2)	195860	139483	138159	154961	131848	160082	169176	199275	158041
RPP25L	#N/A	61591.3	72362.4	88399.9	86376.4		95140.9	90595	79890
TRIP13	Pachytene checkpoint protein 2 homolog (Human papillomavirus type 16 E1 protein-binding protein) (16E1-BP) (HPV16 E1 protein-binding protein) (Thyroid hormone receptor interactor 13) (Thyroid receptor-interacting protein 13) (TR-interacting protein 13) (TRIP-13)	65565.8	95336.2	64365.6	94833.7	91076.5	47063.7	128853	185468	134803
PHGDH	D-3-phosphoglycerate dehydrogenase (3-PGDH) (EC 1.1.1.95) (2-oxoglutarate reductase) (EC 1.1.1.399) (Malate dehydrogenase) (EC 1.1.1.37)	945856	852910	835608	1152110	826178	1089050	1180020	1002570	1111850
ACTN4	Alpha-actinin-4 (Non-muscle alpha-actinin 4)	507486	492071	670698	789784	535553	578958	664946	639008	586352
CORO2A	Coronin-2A (IR10) (WD repeat-containing protein 2)	92082.6	68405.3	122252		78372.8	88888.9	140492	155755	118738
NUP160	Nuclear pore complex protein Nup160 (160 kDa nucleoporin) (Nucleoporin Nup160)	3211830	3577540	3429700	2922900	3496920	3525120	2993310	3125600	3558540
NAGK	N-acetyl-D-glucosamine kinase (N-acetylglucosamine kinase) (EC 2.7.1.59) (GlcNAc kinase) (Muramyl dipeptide kinase) (EC 2.7.1.-) (N-acetyl-D-mannosamine kinase) (EC 2.7.1.60)	167402	145744	115749	2485160	108711	150641	147984	114645	242922
EVPL	Envoplakin (210 kDa cornified envelope precursor protein) (210 kDa paraneoplastic pemphigus antigen) (p210)	77727.2	50153.3	25141.9	203534	35885.5	25627.3	26421.9	32031.9	27511.7
IGLL5	Immunoglobulin lambda-like polypeptide 5 (G lambda-1) (Germline immunoglobulin lambda 1)	7765900	5817510	5332340	7966790	5924760	5514140	5559730	5050930	5652040
TAPT1	Transmembrane anterior posterior transformation protein 1 homolog (Cytomegalovirus partial fusion receptor)		234039	230280	344959	181039	270505	359264	207757	230485
SMARCAL1	SWI/SNF-related matrix-associated actin-dependent regulator of chromatin subfamily A-like protein 1 (EC 3.6.4.-) (HepA-related protein) (hHARP) (Sucrose nonfermenting protein 2-like 1)	159118	146331	129288	167414	147249	153193	150245	105750	149934
PDCD6	Programmed cell death protein 6 (Apoptosis-linked gene 2 protein homolog) (ALG-2)	124851	74417.7	87586.9	407251	82962.9	88671.1	74876.2	76065.7	79775.6
TASOR	Protein TASOR (CTCL tumor antigen se89-1) (Retinoblastoma-associated protein RAP140) (Transgene activation suppressor protein)	217193	218148	230011	165884	230102	264597	328589	318860	332471
PAF1	RNA polymerase II-associated factor 1 homolog (hPAF1) (Pancreatic differentiation protein 2)	402375	762708	506949	557206	584425	458170	536168	557549	576141
GTF3C1	General transcription factor 3C polypeptide 1 (TF3C-alpha) (TFIIIC box B-binding subunit) (Transcription factor IIIC 220 kDa subunit) (TFIIIC 220 kDa subunit) (TFIIIC220) (Transcription factor IIIC subunit alpha)	66525.2	85013.1	97133.4		71680.2	70201.6	81186.6	102474	69743.3
TOP2B	DNA topoisomerase 2-beta (EC 5.6.2.2) (DNA topoisomerase II, beta isozyme)	4947530	10156300	11151700	7426190	8647900	7447020	7086030	6662580	7855210
DNM2	Dynamin-2 (EC 3.6.5.5)	268172	236190	257515	266335	223696	322148	344838	246983	283486
JARID2	Protein Jumonji (Jumonji/ARID domain-containing protein 2)	111537	155733	160319		130169	177858	138667	105582	131021
RXRB	Retinoic acid receptor RXR-beta (Nuclear receptor subfamily 2 group B member 2) (Retinoid X receptor beta)	110187	121831	114374	87861.4	139685	89075.8	144557	112836	128908
TRIM56	E3 ubiquitin-protein ligase TRIM56 (EC 2.3.2.27) (RING finger protein 109) (Tripartite motif-containing protein 56)	130801	171663	161876		21873.6	168140	154361	168274	165593
ACTL6A	Actin-like protein 6A (53 kDa BRG1-associated factor A) (Actin-related protein Baf53a) (ArpNbeta) (BRG1-associated factor 53A) (BAF53A) (INO80 complex subunit K)	1485190	1952480	1859540	1391630	1791750	1515840	1549750	1678830	1736470
KANK2	#N/A	131582	241655	226991		221442	203749	131956	274399	237251
ADAR	Double-stranded RNA-specific adenosine deaminase (DRADA) (EC 3.5.4.37) (136 kDa double-stranded RNA-binding protein) (p136) (Interferon-inducible protein 4) (IFI-4) (K88DSRBP)	274247	285946	308518	370800	331924	292287	285761	338899	330062
RSBN1L	Lysine-specific demethylase RSBN1L (EC 1.14.11.-) (Round spermatid basic protein 1-like protein)	71651.5	47431.4	46106.9		61613.1	66323.8	58496.4	63788.1	80752.1
NUP133	Nuclear pore complex protein Nup133 (133 kDa nucleoporin) (Nucleoporin Nup133)	604708	706445	680054	435792	676343	627272	653872	626777	581980
WDR1	WD repeat-containing protein 1 (Actin-interacting protein 1) (AIP1) (NORI-1)	2054220	2247400	3185090	2687230	2736620	3015400	3599970	3484740	3732550
ELL	RNA polymerase II elongation factor ELL (Eleven-nineteen lysine-rich leukemia protein)	108067	96136.6	93376.1	34603.3	117365	118354	129100	116293	102649
NSD3	Histone-lysine N-methyltransferase NSD3 (EC 2.1.1.370) (EC 2.1.1.371) (Nuclear SET domain-containing protein 3) (Protein whistle) (WHSC1-like 1 isoform 9 with methyltransferase activity to lysine) (Wolf-Hirschhorn syndrome candidate 1-like protein 1) (WHSC1-like protein 1)	114701	124297	118918	85067.1	113468	106131	121413	100483	136664
RNF111	E3 ubiquitin-protein ligase Arkadia (EC 2.3.2.27) (RING finger protein 111) (hRNF111) (RING-type E3 ubiquitin transferase Arkadia)		38651.9	32182.7		26265.3	64745.4	65701.1	41337.5	82503.6
DICER1	#N/A	30837.5	67898.7	78735.1	57822.1	76054.6	40066.1	26613.5	41691.2	19006
ACACA	Acetyl-CoA carboxylase 1 (ACC1) (EC 6.4.1.2) (Acetyl-Coenzyme A carboxylase alpha) (ACC-alpha)	161837	204950	201629	162027	229732	196632	229465	258740	233512
AP1M1	AP-1 complex subunit mu-1 (AP-mu chain family member mu1A) (Adaptor protein complex AP-1 subunit mu-1) (Adaptor-related protein complex 1 subunit mu-1) (Clathrin assembly protein complex 1 mu-1 medium chain 1) (Clathrin coat assembly protein AP47) (Clathrin coat-associated protein AP47) (Golgi adaptor HA1/AP1 adaptin mu-1 subunit) (Mu-adaptin 1) (Mu1A-adaptin)	958859	796487	808326	651842	750277	742132	789553	900860	779811
RIOX2	Ribosomal oxygenase 2 (60S ribosomal protein L27a histidine hydroxylase) (Bifunctional lysine-specific demethylase and histidyl-hydroxylase MINA) (EC 1.14.11.79) (Histone lysine demethylase MINA) (MYC-induced nuclear antigen) (Mineral dust-induced gene protein) (Nucleolar protein 52) (Ribosomal oxygenase MINA) (ROX)	254018	408878	324488	291017	322278	424638	383436	426492	331807
GAA	#N/A		33324.2		52505.5	16622.1				21708.9
TNPO1	Transportin-1 (Importin beta-2) (Karyopherin beta-2) (M9 region interaction protein) (MIP)	225262	175235	189719	207312	174794	275459	294492	203824	206941
RPL35A	Large ribosomal subunit protein eL33 (60S ribosomal protein L35a) (Cell growth-inhibiting gene 33 protein)	12650000	12564800	13627300	10912200	10741000	15835800	15164000	14633300	13798200
RRP12	RRP12-like protein	349545	371675	445490	281711	408174	388371	302292	314821	331329
ZNF462	#N/A	237972	189890	210614		204870	256860	278492	266612	253266
PAK1IP1	p21-activated protein kinase-interacting protein 1 (PAK/PLC-interacting protein 1) (hPIP1) (PAK1-interacting protein 1) (WD repeat-containing protein 84)	1323610	1473420	1340710	1125560	1018160	1308450	1284680	1103350	1132560
VPS39	Vam6/Vps39-like protein (TRAP1-like protein) (hVam6p)	123381	129951	175920	232276	189916	88878.1	147489	152720	224876
RPS23	Small ribosomal subunit protein uS12 (40S ribosomal protein S23)	2687730	2730550	2984370	2428500	2546120	3238510	3350600	3277620	2951340
KBTBD11	Kelch repeat and BTB domain-containing protein 11 (Chronic myelogenous leukemia-associated protein) (Kelch domain-containing protein 7B)	109549	101093	107244	55115.9	88180.6	125367	104380	340243	429438
RBM10	RNA-binding protein 10 (G patch domain-containing protein 9) (RNA-binding motif protein 10) (RNA-binding protein S1-1) (S1-1)	107116	65198.6	97760.6	118797	81660.9	79850.7	74566	69233.3	58941.4
PABPC4	Polyadenylate-binding protein 4 (PABP-4) (Poly(A)-binding protein 4) (Activated-platelet protein 1) (APP-1) (Inducible poly(A)-binding protein) (iPABP)	206874	186789	174211	181193	139709	230608	281187	232408	221794
FMR1	#N/A		40951.5	65995.4		54366.4	28878.9	42062.4	57394.8	50715.8
RANBP2	E3 SUMO-protein ligase RanBP2 (EC 2.3.2.-) (358 kDa nucleoporin) (Nuclear pore complex protein Nup358) (Nucleoporin Nup358) (Ran-binding protein 2) (RanBP2) (p270)	2574950	4972600	9425720	4601200	4632880	4659860	3955840	4105850	4434250
LAMA5	#N/A	176190	306422	302923		241055	383414	328936	273389	306541
TRAPPC8	Trafficking protein particle complex subunit 8 (Protein TRS85 homolog)	39302	90474.9	75422.9		84924.1	119483	76265.4	87025.6	113215
FAF2	FAS-associated factor 2 (Protein ETEA) (UBX domain-containing protein 3B) (UBX domain-containing protein 8)	260728	332837	314788	340500	308019	376678	408984	394421	416526
TAP2	Antigen peptide transporter 2 (APT2) (EC 7.4.2.14) (ATP-binding cassette sub-family B member 3) (Peptide supply factor 2) (Peptide transporter PSF2) (PSF-2) (Peptide transporter TAP2) (Peptide transporter involved in antigen processing 2) (Really interesting new gene 11 protein) (RING11)	841190	1416630	1628180	1343450	1282000	1401590	1661230	2337980	2192550
TAX1BP1	#N/A	40868.7	42588.9	26154.6		38023.2	40093.8	53257.7	18306.4	41077.6
CCM2	#N/A	42237.1	60312.6	40020	35816	45455.6	77288.8	89154.1	60828.4	82399.6
PPP6C	Serine/threonine-protein phosphatase 6 catalytic subunit (PP6C) (EC 3.1.3.16) [Cleaved into: Serine/threonine-protein phosphatase 6 catalytic subunit, N-terminally processed]	462293	527504	449392	415472	551694	615336	586620	777297	779536
PPP1CB	Serine/threonine-protein phosphatase PP1-beta catalytic subunit (PP-1B) (PPP1CD) (EC 3.1.3.16) (EC 3.1.3.53)	650688	692472	593099	904269	697735	690179	680735	737351	760229
RPL18A	Large ribosomal subunit protein eL20 (60S ribosomal protein L18a)	1388970	1565130	1806330	1599920	1596870	1995370	1723490	1748040	1329170
DAXX	Death domain-associated protein 6 (Daxx) (hDaxx) (ETS1-associated protein 1) (EAP1) (Fas death domain-associated protein)		166210	95136.2	231636	116858	420804	566750	219548	204850
TBL1X	F-box-like/WD repeat-containing protein TBL1X (SMAP55) (Transducin beta-like protein 1X) (Transducin-beta-like protein 1, X-linked)	498787	578638	595530	607736	728868	676206	722576	826496	884107
POLD2	DNA polymerase delta subunit 2 (DNA polymerase delta subunit p50)	454236	502890	422145	363603	509907	447518	437230	591122	528446
SETD2	Histone-lysine N-methyltransferase SETD2 (EC 2.1.1.359) (HIF-1) (Huntingtin yeast partner B) (Huntingtin-interacting protein 1) (HIP-1) (Huntingtin-interacting protein B) (Lysine N-methyltransferase 3A) (Protein-lysine N-methyltransferase SETD2) (EC 2.1.1.-) (SET domain-containing protein 2) (hSET2) (p231HBP)	418924	408255	336521	47156.4	397585	379310	356017	425323	474049
TRA2A	Transformer-2 protein homolog alpha (TRA-2 alpha) (TRA2-alpha) (Transformer-2 protein homolog A)	4204180	3585640	4281110	3354630	4264500	3458970	3624090	3223930	3733850
NKAPD1	Uncharacterized protein NKAPD1 (NKAP domain containing protein 1)	174135	115085	160440	61342.4	147647	123471	173504	115345	100899
MT-ND4	#N/A				28999.7
SMCHD1	Structural maintenance of chromosomes flexible hinge domain-containing protein 1 (SMC hinge domain-containing protein 1) (EC 3.6.1.-)	706851	7621920	8205710	5593190	6201650	3809810	3625390	3570110	3114460
RAD21	Double-strand-break repair protein rad21 homolog (hHR21) (Nuclear matrix protein 1) (NXP-1) (SCC1 homolog) [Cleaved into: 64-kDa C-terminal product (64-kDa carboxy-terminal product) (65-kDa carboxy-terminal product)]	730385	1823320	1878110	1336390	1822060	1312550	1254410	1163310	1030690
VCP	Transitional endoplasmic reticulum ATPase (TER ATPase) (EC 3.6.4.6) (15S Mg(2+)-ATPase p97 subunit) (Valosin-containing protein) (VCP)	1360090	1153610	1190070	1464120	1049800	1056060	1058410	969033	1010710
NSA2	Ribosome biogenesis protein NSA2 homolog (Hairy cell leukemia protein 1) (TGF-beta-inducible nuclear protein 1)	1536830	1610990	1452160	1041950	1395870	1526910	1384530	1046770	1082030
FGB	Fibrinogen beta chain [Cleaved into: Fibrinopeptide B; Fibrinogen beta chain]	13550400	9233670	7822640	15324700	7827270	8632160	8226940	7111500	8818570
NAPA	Alpha-soluble NSF attachment protein (SNAP-alpha) (N-ethylmaleimide-sensitive factor attachment protein alpha)	84085	71379.8	81250.3	205387	56519.3	94193.5	79819.5	85832.8	75962.6
HUWE1	E3 ubiquitin-protein ligase HUWE1 (EC 2.3.2.26) (ARF-binding protein 1) (ARF-BP1) (HECT, UBA and WWE domain-containing protein 1) (HECT-type E3 ubiquitin transferase HUWE1) (Homologous to E6AP carboxyl terminus homologous protein 9) (HectH9) (Large structure of UREB1) (LASU1) (Mcl-1 ubiquitin ligase E3) (Mule) (Upstream regulatory element-binding protein 1) (URE-B1) (URE-binding protein 1)	169199	388030	383990	281418	590678	351300	331459	343040	336145
CRNKL1	Crooked neck-like protein 1 (Crooked neck homolog) (hCrn)	667824	620445	576952	461920	604271	561267	508380	517046	499072
AGO1	Protein argonaute-1 (Argonaute1) (hAgo1) (Argonaute RISC catalytic component 1) (Eukaryotic translation initiation factor 2C 1) (eIF-2C 1) (eIF2C 1) (Putative RNA-binding protein Q99)	74861.2	120788	128030	213941	110956	180117	152926	183810	150874
AGO2	Protein argonaute-2 (Argonaute2) (hAgo2) (EC 3.1.26.n2) (Argonaute RISC catalytic component 2) (Eukaryotic translation initiation factor 2C 2) (eIF-2C 2) (eIF2C 2) (PAZ Piwi domain protein) (PPD) (Protein slicer)	164694	197194	228646	333452	190995	243218	242886	257339	273861
STRBP	Spermatid perinuclear RNA-binding protein	203237	229140	233104	236381	230492	245899	203061	187111	178665
PCK2	Phosphoenolpyruvate carboxykinase [GTP], mitochondrial (PEPCK-M) (EC 4.1.1.32)	192666	192826	219862	316173	245001	210536	273343	206812	254098
SMARCA2	Probable global transcription activator SNF2L2 (EC 3.6.4.-) (ATP-dependent helicase SMARCA2) (BRG1-associated factor 190B) (BAF190B) (Protein brahma homolog) (hBRM) (SNF2-alpha) (SWI/SNF-related matrix-associated actin-dependent regulator of chromatin subfamily A member 2)	51842.9	93915.4	76739.5	30499.3	71199.1	117947	110884	101862	126857
C9	Complement component C9 [Cleaved into: Complement component C9a; Complement component C9b]	285704	206316	171629	294944	159098	192576	179442	149237	171003
LARP7	La-related protein 7 (La ribonucleoprotein domain family member 7) (hLARP7) (P-TEFb-interaction protein for 7SK stability) (PIP7S)	343547	472834	442443	408840	511000	449630	410838	402181	479956
XRN1	5'-3' exoribonuclease 1 (EC 3.1.13.-) (Strand-exchange protein 1 homolog)	143165	118883	141388	170861	151910	165516	173803	170646	189440
NAA15	N-alpha-acetyltransferase 15, NatA auxiliary subunit (Gastric cancer antigen Ga19) (N-terminal acetyltransferase) (NMDA receptor-regulated protein 1) (Protein tubedown-1) (Tbdn100)	192685	244112	244919	245669	236763	326409	335450	278417	299638
NMT1	Glycylpeptide N-tetradecanoyltransferase 1 (EC 2.3.1.97) (Myristoyl-CoA:protein N-myristoyltransferase 1) (HsNMT1) (NMT 1) (Type I N-myristoyltransferase) (Peptide N-myristoyltransferase 1) (Protein-lysine myristoyltransferase NMT1) (EC 2.3.1.-)	466002	433348	528328	378079	417409	549610	644846	649483	678236
SRP72	Signal recognition particle subunit SRP72 (SRP72) (Signal recognition particle 72 kDa protein)	162313	129198	125248		113548	154608	164786	148118	107156
SMAD2	Mothers against decapentaplegic homolog 2 (MAD homolog 2) (Mothers against DPP homolog 2) (JV18-1) (Mad-related protein 2) (hMAD-2) (SMAD family member 2) (SMAD 2) (Smad2) (hSMAD2)	760732	891330	894454	1206670	1145150	1098600	1340270	1570870	1094000
RSF1	Remodeling and spacing factor 1 (Rsf-1) (HBV pX-associated protein 8) (Hepatitis B virus X-associated protein) (p325 subunit of RSF chromatin-remodeling complex)	29777.8	1161310	1199230	884417	905162	618764	550118	540211	746335
AP1S1	AP-1 complex subunit sigma-1A (Adaptor protein complex AP-1 subunit sigma-1A) (Adaptor-related protein complex 1 subunit sigma-1A) (Clathrin assembly protein complex 1 sigma-1A small chain) (Clathrin coat assembly protein AP19) (Golgi adaptor HA1/AP1 adaptin sigma-1A subunit) (HA1 19 kDa subunit) (Sigma 1a subunit of AP-1 clathrin) (Sigma-adaptin 1A) (Sigma1A-adaptin)	36700.3	56320.5	45075.8	144965	26237.3	48591.6	50167	59353.8	60714.7
EIF2A	Eukaryotic translation initiation factor 2A (eIF-2A) (65 kDa eukaryotic translation initiation factor 2A) [Cleaved into: Eukaryotic translation initiation factor 2A, N-terminally processed]	298318	247548	233570	210847	226888	264690	332616	312145	260216
DERL2	Derlin-2 (Degradation in endoplasmic reticulum protein 2) (DERtrin-2) (Der1-like protein 2) (F-LAN-1) (F-LANa)		134066	103095	161471	91341.7	153211	65446.9	130073	214999
DHX30	ATP-dependent RNA helicase DHX30 (EC 3.6.4.13) (DEAH box protein 30)	360396	348510	459082	276580	373400	497797	598902	520512	517797
YLPM1	#N/A	191495	214521	275428	71809.5	210116	304504	340465	254939	218303
MTREX	Exosome RNA helicase MTR4 (EC 3.6.4.13) (ATP-dependent RNA helicase DOB1) (ATP-dependent RNA helicase SKIV2L2) (Superkiller viralicidic activity 2-like 2) (TRAMP-like complex helicase)	1122150	1507650	1510540	1151130	1514020	1438490	1372030	1184510	1151270
INTS8	Integrator complex subunit 8 (Int8) (Protein kaonashi-1)	741338	767956	702835	330751	815926	744320	779967	836186	864417
RAVER1	Ribonucleoprotein PTB-binding 1 (Protein raver-1)		71429.1	79534.2	169553	69999.6	74722.3	93121	75280.4	88105.7
IPO5	Importin-5 (Imp5) (Importin subunit beta-3) (Karyopherin beta-3) (Ran-binding protein 5) (RanBP5)	93364.4	95287.7	104236	98476.6	91992.6	97195.5	112700	78007.6	64527.9
PFKL	ATP-dependent 6-phosphofructokinase, liver type (ATP-PFK) (PFK-L) (EC 2.7.1.11) (6-phosphofructokinase type B) (Phosphofructo-1-kinase isozyme B) (PFK-B) (Phosphohexokinase)	380440	388074	353605	534019	397913	281627	341003	401233	369459
A2M	Alpha-2-macroglobulin (Alpha-2-M) (C3 and PZP-like alpha-2-macroglobulin domain-containing protein 5)	10738500	7562260	6348620	11333200	6298610	7092990	6948860	5756550	7121860
SEPTIN2	Septin-2 (Neural precursor cell expressed developmentally down-regulated protein 5) (NEDD-5)	450429	302113	211648	364364	221294	284104	277633	213831	213025
WDR55	#N/A	504017	622190	596350	419826	555814	607638	526579	518868	618720
ANKRD28	Serine/threonine-protein phosphatase 6 regulatory ankyrin repeat subunit A (PP6-ARS-A) (Serine/threonine-protein phosphatase 6 regulatory subunit ARS-A) (Ankyrin repeat domain-containing protein 28) (Phosphatase interactor targeting protein hnRNP K) (PITK)	53885	95465.5	137522	98372.7	151938	159418	130049	202427	171270
RPS7	Small ribosomal subunit protein eS7 (40S ribosomal protein S7)	2572220	2605900	2587140	2329290	2042420	2889650	3336810	2961840	2915940
ABCE1	ATP-binding cassette sub-family E member 1 (EC 3.6.5.-) (2'-5'-oligoadenylate-binding protein) (HuHP68) (RNase L inhibitor) (Ribonuclease 4 inhibitor) (RNS4I)	449909	406936	424517	503203	420486	495610	556377	480698	542099
NOP56	Nucleolar protein 56 (Nucleolar protein 5A)	2301120	3119230	3237420	2717550	2863870	3089400	3062830	2892570	2517430
NSMCE1	#N/A						52827.5	39476.5	44624.2	68404.6
TCF25	#N/A	58799.8	82685.2	87547.2		91352.4	104809	115494	113789	119838
AP3S1	AP-3 complex subunit sigma-1 (AP-3 complex subunit sigma-3A) (Adaptor-related protein complex 3 subunit sigma-1) (Clathrin-associated/assembly/adaptor protein, small 3) (Sigma-3A-adaptin) (Sigma3A-adaptin) (Sigma-adaptin 3a)		22439.4	18412		31013.9		43278.1	45140.1	51290.5
COPZ1	#N/A				45478.3
LYAR	#N/A	77238	55485.7	66336.8		53191.2	98986.7	86755	64165.8	50082.4
AHCTF1	Protein ELYS (Embryonic large molecule derived from yolk sac) (Protein MEL-28) (Putative AT-hook-containing transcription factor 1)	704304	941379	888907	747634	902959	824910	716747	723715	772737
AIMP1	Aminoacyl tRNA synthase complex-interacting multifunctional protein 1 (Multisynthase complex auxiliary component p43) [Cleaved into: Endothelial monocyte-activating polypeptide 2 (EMAP-2) (Endothelial monocyte-activating polypeptide II) (EMAP-II) (Small inducible cytokine subfamily E member 1)]	59481.7	80628.5	47824.8	261570	55812.1	92005.8	82348.3	114746	99679.1
STAT3	Signal transducer and activator of transcription 3 (Acute-phase response factor)	184690	243273	246686	264998	291445	285537	279353	358012	409476
TUBB	Tubulin beta chain (Tubulin beta-5 chain)	7542510	7726510	7433690	8655920	8504980	8641760	8914720	9977560	10896400
BRD8	Bromodomain-containing protein 8 (Skeletal muscle abundant protein) (Skeletal muscle abundant protein 2) (Thyroid hormone receptor coactivating protein of 120 kDa) (TrCP120) (p120)		3608380	2761770	1787930	2664020	1131300	1051630	897556	1105430
FXR1	RNA-binding protein FXR1 (FMR1 autosomal homolog 1) (hFXR1p)	587394	645476	666251	311459	651557	724278	702414	829221	817829
KHSRP	Far upstream element-binding protein 2 (FUSE-binding protein 2) (KH type-splicing regulatory protein) (KSRP) (p75)	3954270	3275870	3230570	3277980	2871660	4964380	5116200	4646550	4946190
ELAVL1	ELAV-like protein 1 (Hu-antigen R) (HuR)	4538310	4300370	4502970	3390420	4242850	4181870	4245590	3809580	3855840
UBAP2L	Ubiquitin-associated protein 2-like (Protein NICE-4) (RNA polymerase II degradation factor UBAP2L)	76702	55167.7	103067	50049.5	69021.8	61747.6	86622.3	63308.1	71991.5
DDX56	Probable ATP-dependent RNA helicase DDX56 (EC 3.6.4.13) (ATP-dependent 61 kDa nucleolar RNA helicase) (DEAD box protein 21) (DEAD box protein 56)	444016	581138	592201	432333	548202	548330	493058	502312	516516
TENT2	Poly(A) RNA polymerase GLD2 (hGLD-2) (EC 2.7.7.19) (PAP-associated domain-containing protein 4) (Terminal nucleotidyltransferase 2) (Terminal uridylyltransferase 2) (TUTase 2)	174037	258901	238035	252164	236359	277112	278994	269496	254671
TOP3A	DNA topoisomerase 3-alpha (EC 5.6.2.1) (DNA topoisomerase III alpha)	74460.8	104169	89487.9	57559	116932	102496	92120.8	102558	107295
EZH1	Histone-lysine N-methyltransferase EZH1 (EC 2.1.1.356) (ENX-2) (Enhancer of zeste homolog 1)	565469	457225	452475		380019	448688	460286	248576	454464
PUF60	Poly(U)-binding-splicing factor PUF60 (60 kDa poly(U)-binding-splicing factor) (FUSE-binding protein-interacting repressor) (FBP-interacting repressor) (Ro-binding protein 1) (RoBP1) (Siah-binding protein 1) (Siah-BP1)	464906	496000	542086	466503	480771	423474	511076	424000	409168
ABCB6	ATP-binding cassette sub-family B member 6 (ABC-type heme transporter ABCB6) (EC 7.6.2.5) (Mitochondrial ABC transporter 3) (Mt-ABC transporter 3) (P-glycoprotein-related protein) (Ubiquitously-expressed mammalian ABC half transporter)	355827	329376	293118	270857	215746	299259	256798	326995	505842
UTP25	U3 small nucleolar RNA-associated protein 25 homolog (Digestive organ expansion factor homolog) (UTP25 small subunit processor component)	1087860	1371270	1287170	1069460	1220590	900335	883102	775584	848533
TOLLIP	Toll-interacting protein	115262		78909.9	1248560	31223.7			75317.1	68346.5
PSMD3	26S proteasome non-ATPase regulatory subunit 3 (26S proteasome regulatory subunit RPN3) (26S proteasome regulatory subunit S3) (Proteasome subunit p58)	455169	441981	466932	488596	378219	479316	478590	533664	535628
FGG	Fibrinogen gamma chain	7.19333e+06	5.12796e+06	4.27485e+06	7.76345e+06	4.20355e+06	4.70323e+06	4.50377e+06	3.88788e+06	4.64943e+06
EZH2	Histone-lysine N-methyltransferase EZH2 (EC 2.1.1.356) (ENX-1) (Enhancer of zeste homolog 2) (Lysine N-methyltransferase 6)	527233	905655	786810	678184	816281	728160	674302	734715	871979
MACROH2A2	Histone H2A	74453.4	78949	29848.7			81709.9		40087.9	42713
HTT	Huntingtin (Huntington disease protein) (HD protein) [Cleaved into: Huntingtin, myristoylated N-terminal fragment]	43005	42285.4		120009	45389.3	47014.3	61047.8	71625.4	76559.4
PPP2R1A	Serine/threonine-protein phosphatase 2A 65 kDa regulatory subunit A alpha isoform (Medium tumor antigen-associated 61 kDa protein) (PP2A subunit A isoform PR65-alpha) (PP2A subunit A isoform R1-alpha)	205815	310645	237741	302892	249624	385806	375507	269158	305662
VPS41	Vacuolar protein sorting-associated protein 41 homolog (S53)	89288.9	78335.3	73550.9	84714.9	95102.2	87848.4	81077	119431	130198
CPSF7	Cleavage and polyadenylation specificity factor subunit 7 (Cleavage and polyadenylation specificity factor 59 kDa subunit) (CPSF 59 kDa subunit) (Cleavage factor Im complex 59 kDa subunit) (CFIm59) (Pre-mRNA cleavage factor Im 59 kDa subunit)	653831	673713	629523	549919	668193	659696	709420	618067	639913
CPSF6	Cleavage and polyadenylation specificity factor subunit 6 (Cleavage and polyadenylation specificity factor 68 kDa subunit) (CPSF 68 kDa subunit) (Cleavage factor Im complex 68 kDa subunit) (CFIm68) (Pre-mRNA cleavage factor Im 68 kDa subunit) (Protein HPBRII-4/7)	3928330	2767390	2579610	2343820	2382710	3586260	3764830	2844300	2765230
TBRG4	#N/A	58550.6	45820.8	72917.5			53704.6	71143.7	84472.7	74676.3
YTHDF3	YTH domain-containing family protein 3 (DF3)	1908190	1658150	1614010	1367110	1584680	1640820	1625140	1626850	1590260
DDX52	Probable ATP-dependent RNA helicase DDX52 (EC 3.6.4.13) (ATP-dependent RNA helicase ROK1-like) (DEAD box protein 52)	422241	640184	544670	524548	563766	496880	443544	415608	407808
RPL24	Large ribosomal subunit protein eL24 (60S ribosomal protein L24) (60S ribosomal protein L30)	2702600	2777890	2924460	2363150	2418510	3265100	3158800	3444380	2944310
HNRNPL	Heterogeneous nuclear ribonucleoprotein L	7008310	6227930	5835540	4335170	5951490	5666960	5275770	5562060	6251780
	Heterogeneous nuclear ribonucleoprotein L (hnRNP L)	18444800	14662600	15078000	13695700	16931600	14137300	13168800	15452100	13875300
	#N/A	82075.5	59200.7	41548.4		60678.6	51110.2	45567.1	44666	48557
PAN2	PAN2-PAN3 deadenylation complex catalytic subunit PAN2 (EC 3.1.13.4) (Inactive ubiquitin carboxyl-terminal hydrolase 52) (PAB1P-dependent poly(A)-specific ribonuclease) (Poly(A)-nuclease deadenylation complex subunit 2) (PAN deadenylation complex subunit 2)	167582	135246	178329	96003.2	162388	168286	150049	152757	247997
RAB11B	Ras-related protein Rab-11B (EC 3.6.5.2) (GTP-binding protein YPT3)	609567	544125	542396	893668	431955	544899	518725	484966	573679
PSMA7	Proteasome subunit alpha type-7 (Proteasome subunit RC6-1) (Proteasome subunit XAPC7)	1067870	832906	588039	7923130	750829	774216	898309	810203	1119320
UTP3	Something about silencing protein 10 (Charged amino acid-rich leucine zipper 1) (CRL1) (Disrupter of silencing SAS10) (UTP3 homolog)	157227	429056	366496	303856	349137	222864	202170	214980	247469
RPSA	Small ribosomal subunit protein uS2 (37 kDa laminin receptor precursor) (37LRP) (37/67 kDa laminin receptor) (LRP/LR) (40S ribosomal protein SA) (67 kDa laminin receptor) (67LR) (Colon carcinoma laminin-binding protein) (Laminin receptor 1) (LamR) (Laminin-binding protein precursor p40) (LBP/p40) (Multidrug resistance-associated protein MGr1-Ag) (NEM/1CHD4)	2182470	2148320	2019750	4191510	1864630	2771620	2682260	2360850	2891950
CHAF1B	Chromatin assembly factor 1 subunit B (CAF-1 subunit B) (Chromatin assembly factor I p60 subunit) (CAF-I 60 kDa subunit) (CAF-I p60) (M-phase phosphoprotein 7)		51898.4	151958	113497	101679	54501.5		51229.1	99686.8
SRPRB	Signal recognition particle receptor subunit beta (SR-beta) (Protein APMCF1)	410390	426307	399595	535077	378899	421869	400910	439785	349323
NR2C2	Nuclear receptor subfamily 2 group C member 2 (Orphan nuclear receptor TAK1) (Orphan nuclear receptor TR4) (Testicular receptor 4)	129389	279118	255551	202565	292371	292135	268205	295325	306965
KDM2A	Lysine-specific demethylase 2A (EC 1.14.11.27) (CXXC-type zinc finger protein 8) (F-box and leucine-rich repeat protein 11) (F-box protein FBL7) (F-box protein Lilina) (F-box/LRR-repeat protein 11) (JmjC domain-containing histone demethylation protein 1A) ([Histone-H3]-lysine-36 demethylase 1A)	647387	898207	789633	738871	813399	741385	735482	799290	831156
PAFAH1B3	Platelet-activating factor acetylhydrolase IB subunit alpha1 (EC 3.1.1.47) (PAF acetylhydrolase 29 kDa subunit) (PAF-AH 29 kDa subunit) (PAF-AH subunit gamma) (PAFAH subunit gamma)	492643	419774	345649	339844	334860	565044	635997	307058	267379
UGGT1	UDP-glucose:glycoprotein glucosyltransferase 1 (UGT1) (hUGT1) (EC 2.4.1.-) (UDP--Glc:glycoprotein glucosyltransferase) (UDP-glucose ceramide glucosyltransferase-like 1)	106554	168643	145450	131866	146933	130910	169641	98540.8	127864
SWAP70	Switch-associated protein 70 (SWAP-70)	93961.9	128589	159117	105231	151018	167262	197592	138829	137362
GFM1	Elongation factor G, mitochondrial (EF-Gmt) (Elongation factor G 1, mitochondrial) (mEF-G 1) (Elongation factor G1) (hEFG1)	215755	200246	291270	227915	300679	318554	342875	465938	422235
CPSF2	Cleavage and polyadenylation specificity factor subunit 2 (Cleavage and polyadenylation specificity factor 100 kDa subunit) (CPSF 100 kDa subunit)	567049	596210	532624	461981	587228	647926	590199	588643	643254
EEF1G	Elongation factor 1-gamma (EF-1-gamma) (eEF-1B gamma)	4788020	4014960	4433430	4749270	4225520	4564760	4832750	4937780	4725950
DHX38	Pre-mRNA-splicing factor ATP-dependent RNA helicase PRP16 (EC 3.6.4.13) (ATP-dependent RNA helicase DHX38) (DEAH box protein 38)	230842	251524	260943	181816	281202	224778	227612	192723	220058
RRP7A	#N/A	121157	251030	238071	108825	294124	208051	186578	173160	77082.3
KHDRBS1	KH domain-containing, RNA-binding, signal transduction-associated protein 1 (GAP-associated tyrosine phosphoprotein p62) (Src-associated in mitosis 68 kDa protein) (Sam68) (p21 Ras GTPase-activating protein-associated p62) (p68)	3471380	2545840	2516720	1987240	1983600	3081760	3427600	2655480	2921330
ATP6V1A	V-type proton ATPase catalytic subunit A (V-ATPase subunit A) (EC 7.1.2.2) (V-ATPase 69 kDa subunit) (Vacuolar ATPase isoform VA68) (Vacuolar proton pump subunit alpha)	390302	451512	476226	749647	353931	523887	646925	610336	659098
EIF3C;EIF3CL	Eukaryotic translation initiation factor 3 subunit C-like protein	266731	293450	254286	324233	264164	339283	333239	277235	329050
RAB6A	Ras-related protein Rab-6A (Rab-6)	1340470	1101500	1129750	1518030	1012490	1288080	1426000	1132840	1254590
INTS4	Integrator complex subunit 4 (Int4)	83018.9	134078	137355	94895.8	131468	184061	115667	120293	101627
RBM25	RNA-binding protein 25 (Arg/Glu/Asp-rich protein of 120 kDa) (RED120) (Protein S164) (RNA-binding motif protein 25) (RNA-binding region-containing protein 7)	756800	2463120	2292610	1602680	2375130	1430230	1511020	1349420	1439160
EPS15L1	#N/A		217153	160394	116756	184551	231515	176435	124981	189187
EEFSEC	Selenocysteine-specific elongation factor (Elongation factor sec) (Eukaryotic elongation factor, selenocysteine-tRNA-specific)	213595	189026	197745	191921	189171	193077	164227	227816	193274
DHX8	ATP-dependent RNA helicase DHX8 (EC 3.6.4.13) (DEAH box protein 8) (RNA helicase HRH1)	851394	862738	810197	638012	802644	709282	719078	554143	624259
XPO7	Exportin-7 (Exp7) (Ran-binding protein 16)	102052	89298.5	69339.6	71459.5	64717.1	87957.9	92284.9	73865.3	73067.2
NSD2	Histone-lysine N-methyltransferase NSD2 (EC 2.1.1.357) (Multiple myeloma SET domain-containing protein) (MMSET) (Nuclear SET domain-containing protein 2) (Protein trithorax-5) (Wolf-Hirschhorn syndrome candidate 1 protein)	684288	854868	709912	585616	822906	710410	642903	666407	704429
EZR	Ezrin (Cytovillin) (Villin-2) (p81)	666966	535662	679325	692983	570949	440188	537914	536584	551632
MSN	Moesin (Membrane-organizing extension spike protein)	2223570	1748730	2422090	1811600	2085600	1711310	1997140	2275940	2172780
YTHDC1	YTH domain-containing protein 1 (Splicing factor YT521) (YT521-B)	435347	559372	608475	413030	515821	512707	444943	493264	416855
	#N/A	209518	252838	378766	68677.5	128137	286289	263410	248964	180219
AP2A2	AP-2 complex subunit alpha-2 (100 kDa coated vesicle protein C) (Adaptor protein complex AP-2 subunit alpha-2) (Adaptor-related protein complex 2 subunit alpha-2) (Alpha-adaptin C) (Alpha2-adaptin) (Clathrin assembly protein complex 2 alpha-C large chain) (Huntingtin yeast partner J) (Huntingtin-interacting protein 9) (HIP-9) (Huntingtin-interacting protein J) (Plasma membrane adaptor HA2/AP2 ada…	74701.4	83247.9	117477		84433	80456.7	99058.3	116487	85150.6
BIRC6	Baculoviral IAP repeat-containing protein 6 (EC 2.3.2.27) (BIR repeat-containing ubiquitin-conjugating enzyme) (BRUCE) (RING-type E3 ubiquitin transferase BIRC6) (Ubiquitin-conjugating BIR domain enzyme apollon) (APOLLON)	104611	105999	78796.1	99282.4	76928		163225	142377	140744
AP2A1	AP-2 complex subunit alpha-1 (100 kDa coated vesicle protein A) (Adaptor protein complex AP-2 subunit alpha-1) (Adaptor-related protein complex 2 subunit alpha-1) (Alpha-adaptin A) (Alpha1-adaptin) (Clathrin assembly protein complex 2 alpha-A large chain) (Plasma membrane adaptor HA2/AP2 adaptin alpha A subunit)	647082	605303	749087	638138	688097	782074	758087	826324	863556
MRPL37	#N/A	99314.4	119024	194530	281559	122741	143240	114710	198213	133563
SCAF8	SR-related and CTD-associated factor 8 (CDC5L complex-associated protein 7) (RNA-binding motif protein 16)			42213		27391.4	19496	33733.5	28088.6
MYO1C	Unconventional myosin-Ic (Myosin I beta) (MMI-beta) (MMIb)	170790	234336	280176	273129	241050	259768	275572	248109	263873
GNL2	Nucleolar GTP-binding protein 2 (Autoantigen NGP-1)	501491	768969	709206	611136	643834	758232	704048	667515	679695
SETD1A	Histone-lysine N-methyltransferase SETD1A (EC 2.1.1.364) (Lysine N-methyltransferase 2F) (SET domain-containing protein 1A) (hSET1A) (Set1/Ash2 histone methyltransferase complex subunit SET1)	99227.8	153707	160180	115642	113963	120805	118841	107395	166376
USP8	#N/A	39860.7		26930.7	15055.2	20731.6	39426.7	35815.2	64105.5	48473.8
PHF3	PHD finger protein 3	65704.5	83243.5	100202	69910.6	78508.6	97139.2	68704.1	79661.3	117954
RPL15	Large ribosomal subunit protein eL15 (60S ribosomal protein L15)	2279340	3121800	3374200	1987180	2560690	3196770	3069060	3322200	2328630
THOC1	#N/A		89454.8		57076.3		122425	101416
SIN3B	Paired amphipathic helix protein Sin3b (Histone deacetylase complex subunit Sin3b) (Transcriptional corepressor Sin3b)	44790.7	145983	135250	90014	139413	111757	140157	108411	153889
COPB1	Coatomer subunit beta (Beta-coat protein) (Beta-COP)	1038320	924246	1140780	1005590	1123090	1153030	1198110	1327650	1332560
TMPO	Lamina-associated polypeptide 2, isoforms beta/gamma (Thymopoietin, isoforms beta/gamma) (TP beta/gamma) (Thymopoietin-related peptide isoforms beta/gamma) (TPRP isoforms beta/gamma) [Cleaved into: Thymopoietin (TP) (Splenin); Thymopentin (TP5)]	861313	927391	1060340	813265	833405	1125940	1279110	944257	814221
SERBP1	SERPINE1 mRNA-binding protein 1 (PAI1 RNA-binding protein 1) (PAI-RBP1) (Plasminogen activator inhibitor 1 RNA-binding protein)	201600	109717	138449	212544	103503	141013	227755	195043	128990
PELO	Protein pelota homolog (hPelota) (Protein Dom34 homolog)	108947	109716	146430	105313	135935	133789	155886	145890	143284
IQGAP1	Ras GTPase-activating-like protein IQGAP1 (p195)	1039190	1395860	1465500	1392790	1227740	1502160	1623560	1330320	1396550
EPB41L4B	#N/A		91776.2		29928.9	40088.2			80795.8	46170.7
RAC1	Ras-related C3 botulinum toxin substrate 1 (EC 3.6.5.2) (Cell migration-inducing gene 5 protein) (Ras-like protein TC25) (p21-Rac1)	290922	166658	259405	285940	161942	245777	270495	223540	236891
SFXN1	Sideroflexin-1	71659	59720.8	51000.5		47344.8	42472.6	42862.5	71653.6	63175
RPS19	Small ribosomal subunit protein eS19 (40S ribosomal protein S19)	552726	399816	379303	529938	292482	458461	347284	389223	336049
ARPC5	Actin-related protein 2/3 complex subunit 5 (Arp2/3 complex 16 kDa subunit) (p16-ARC)	248992	170195	150467	181412	112389	174267	158860	139206	138064
H1-5	Histone H1.5 (Histone H1a) (Histone H1b) (Histone H1s-3)	13205200	11433700	14401700	8545970	10565800	9545010	8524090	18222200	10264300
MCM4	DNA replication licensing factor MCM4 (EC 3.6.4.12) (CDC21 homolog) (P1-CDC21)	3142140	3662350	3755980	3195130	4043230	3399280	3508980	3469720	3421150
PPIP5K2	#N/A	68256.3	73699.4			114993		80884	88557.7	122941
FAM133B	Protein FAM133B	80173.8	64574.6	65479.8	95778.1	72446.3	60249.3	94982.9	64931.7	60570.2
GSS	Glutathione synthetase (GSH synthetase) (GSH-S) (EC 6.3.2.3) (Glutathione synthase)	235928	170901	132192	1537470	116280	140940	152474	145589	206062
RHEB	GTP-binding protein Rheb (Ras homolog enriched in brain)	139636	128099	124663	175178	90921.6	137308	139235	122779	151743
WDR46	WD repeat-containing protein 46 (WD repeat-containing protein BING4)	1437880	1970110	2082070	1604500	1955360	1667370	1369390	1396300	1384500
FAR1	Fatty acyl-CoA reductase 1 (EC 1.2.1.84) (Male sterility domain-containing protein 2)	514864	583753	562920	423215	514152	628228	654230	768522	768025
STRN3	Striatin-3 (Cell cycle autoantigen SG2NA) (S/G2 antigen)	29585.4	35404.8	53127.1	24185.8	23038.7		54014.9	39459.1	35674.2
SREK1	Splicing regulatory glutamine/lysine-rich protein 1 (Serine/arginine-rich-splicing regulatory protein 86) (SRrp86) (Splicing factor, arginine/serine-rich 12) (Splicing regulatory protein 508) (SRrp508)	391643	224069	249946	199834	249954	204226	233208	189919	248653
AFG2A	ATPase family gene 2 protein homolog A (EC 3.6.4.10) (AFG2 AAA ATPase homolog A) (Ribosome biogenesis protein SPATA5) (Spermatogenesis-associated factor protein) (Spermatogenesis-associated protein 5)	124531	180914	207668	269000	210455	193914	284409	188414	196665
EXOC4	#N/A			22015.7			23803.6	20603.6	28328.8	18943.5
P4HB	Protein disulfide-isomerase (PDI) (EC 5.3.4.1) (Cellular thyroid hormone-binding protein) (Prolyl 4-hydroxylase subunit beta) (p55)	458802	332852	293644	544593	252459	310573	289995	282830	301216
SGO2	#N/A	259450	301616	252790	218259	294839	343715	363071	332615	290079
UBE2S	#N/A		15429.3	17431.1			42867.1	64243.8	45924.5	73758.3
ATL3	#N/A	141150	165497	179289	537240	117348	196364	188736	160344	198220
POLR3C	DNA-directed RNA polymerase III subunit RPC3 (RNA polymerase III subunit C3) (DNA-directed RNA polymerase III subunit C) (RNA polymerase III 62 kDa subunit) (RPC62)		27826.2	35446.8		19127.7	43698.9	41409.5	38797.8	31120
GLUD1	Glutamate dehydrogenase 1, mitochondrial (GDH 1) (EC 1.4.1.3)	221332	226920	242605	308489	185554	224482	302018	239831	199332
KIF4A	Chromosome-associated kinesin KIF4A (Chromokinesin-A)	429212	456829	504239	390941	425115	470526	438085	365731	378336
VCL	Vinculin (Metavinculin) (MV)	218424	189669	157157	2297530	144638	182273	184890	123530	221573
ARPC5L	Actin-related protein 2/3 complex subunit 5-like protein (Arp2/3 complex 16 kDa subunit 2) (ARC16-2)	85524.8	159715	166773	219966	96188.1	183561	144928	79186.2	147189
XPOT	Exportin-T (Exportin(tRNA)) (tRNA exportin)	185960	174209	125358	215280	165130	157665	159280	177485	197138
MTA2	Metastasis-associated protein MTA2 (Metastasis-associated 1-like 1) (MTA1-L1 protein) (p53 target protein in deacetylase complex)	3300640	7327500	7453020	6103880	8080510	6091820	5604220	6045990	6432360
PRAF2	PRA1 family protein 2	173262	168966	153597	184253	109445	165687	98280	145800	133048
HYCC1	Hyccin (Down-regulated by CTNNB1 protein A)	79390.6	56461.8	59777.6	48415.3	78055.5	83334.1	77452	89112.3	113912
ARID4B	#N/A		72250.4	54991.2		68351.4	26713.6	26941.7		22193.8
CST3	Cystatin-C (Cystatin-3) (Gamma-trace) (Neuroendocrine basic polypeptide) (Post-gamma-globulin)	631913	440875	398790	1594520	340096	393514	421887	356074	442443
SRSF6	Serine/arginine-rich splicing factor 6 (Pre-mRNA-splicing factor SRP55) (Splicing factor, arginine/serine-rich 6)	1529750	1413360	1532230	1248830	1344610	1580250	1642480	1523610	1441550
PPM1G	#N/A			66462.4			99404.1	118691		63669.2
METAP2	Methionine aminopeptidase 2 (MAP 2) (MetAP 2) (EC 3.4.11.18) (Initiation factor 2-associated 67 kDa glycoprotein) (p67) (p67eIF2) (Peptidase M)				105237					69978.9
GLYR1	Cytokine-like nuclear factor N-PAC (NPAC) (3-hydroxyisobutyrate dehydrogenase-like protein) (Glyoxylate reductase 1 homolog) (Nuclear protein NP60) (Nuclear protein of 60 kDa) (Nucleosome-destabilizing factor) (hNDF) (Putative oxidoreductase GLYR1)	1129290	3.10652e+06	3.03395e+06	2633460	3.14009e+06	5.53557e+06	5.1906e+06	5.10973e+06	5.05113e+06
VIRMA	Protein virilizer homolog	92172	131032	101855	75246	145134	122833	126110	130337	118791
APEH	Acylamino-acid-releasing enzyme (AARE) (EC 3.4.19.1) (Acyl-peptide hydrolase) (APH) (Acylaminoacyl-peptidase) (Oxidized protein hydrolase) (OPH)	73979.6	79479.7	34841.3	1019580	68410.6	59721	77497.7	72564.3	110884
DSG3	Desmoglein-3 (130 kDa pemphigus vulgaris antigen) (PVA) (Cadherin family member 6)	172336	99127.1	93418.7	379562	68156.8	81957.7	56869.6	69143	72800.6
RBM15B	Putative RNA-binding protein 15B (One-twenty two protein 3) (HsOTT3) (HuOTT3) (RNA-binding motif protein 15B)	133489	174668	162962	81533	169624	151793	134549	169144	163941
GTF3C3	General transcription factor 3C polypeptide 3 (Transcription factor IIIC 102 kDa subunit) (TFIIIC 102 kDa subunit) (TFIIIC102) (Transcription factor IIIC subunit gamma) (TF3C-gamma)	426904	405503	445218	295983	490417	443368	456251	456039	518201
RBMX	RNA-binding motif protein, X chromosome (Glycoprotein p43) (Heterogeneous nuclear ribonucleoprotein G) (hnRNP G) [Cleaved into: RNA-binding motif protein, X chromosome, N-terminally processed]	18260600	14020400	14852700	13145100	15378900	13719900	14454800	14255600	13445600
DCAF8	DDB1- and CUL4-associated factor 8 (WD repeat-containing protein 42A)	182295	182310	230076	198603	289369	252368	237677	301387	349241
LRCH1	Leucine-rich repeat and calponin homology domain-containing protein 1 (Calponin homology domain-containing protein 1) (Neuronal protein 81) (NP81)	44776.5	60840.6	61611.8		57734.6	41174.4	100360	138437	148481
LRCH3	DISP complex protein LRCH3 (Leucine-rich repeat and calponin homology domain-containing protein 3)	235153	200596	245177	187508	312807	252356	232091	289846	347409
KRT13	Keratin 13	264783	379209		14581500	363332	201751	593462	436348	1132330
	Keratin, type I cytoskeletal 13 (Cytokeratin-13) (CK-13) (Keratin-13) (K13)	43011800	29431200	25881500	45499700	23350000	28549400	27925200	27187900	30082300
KRT17	Keratin, type I cytoskeletal 17 (39.1) (Cytokeratin-17) (CK-17) (Keratin-17) (K17)	2238190	2346530	2424740	94503600	2727690	2214390	4900610	2682200	17648700
RNF14	#N/A		44567.8	34474.4	51434.3	50807.5	41194.8	65209.9	72758.7	21878.9
ZNF710	Zinc finger protein 710	83198.5	230031	186897		149837	119676	171601	132849	114784
CTPS1	#N/A	119134	86637.4	106627		134562	111142	146828	118290	141161
SRSF4	Serine/arginine-rich splicing factor 4 (Pre-mRNA-splicing factor SRP75) (SRP001LB) (Splicing factor, arginine/serine-rich 4)	198634	77222.2	231724	433741	177215	279716	284038	196622	279267
USP36	Ubiquitin carboxyl-terminal hydrolase 36 (EC 3.4.19.12) (Deubiquitinating enzyme 36) (Ubiquitin thioesterase 36) (Ubiquitin-specific-processing protease 36)	508539	797521	700282	570805	669630	614219	533181	478703	430681
PSAT1	Phosphoserine aminotransferase (EC 2.6.1.52) (Phosphohydroxythreonine aminotransferase) (PSAT)	266514	400140	427931	412390	366601	498758	506044	553568	502658
PEX5	#N/A		66733.8	59978.7	76018.5	69727.5	121658	101590	83263.6	134088
NCL	Nucleolin (Protein C23)	4748110	3228350	3518970	3959470	2516740	2908530	2854070	2555000	2567810
NELFB	Negative elongation factor B (NELF-B) (Cofactor of BRCA1)	14165.8	7945.68	37070		25354.4	44591.3	59298.9	27838.1	48756.6
MAK16	Protein MAK16 homolog (NNP78) (Protein RBM13)	1510420	1993520	1846340	1349420	1805970	1546760	1409530	1531930	1506670
PUM2	Pumilio homolog 2 (Pumilio-2)	194325	152728	169861	281896	157303	167049	199426	155519	228393
SUZ12	Polycomb protein SUZ12 (Chromatin precipitated E2F target 9 protein) (ChET 9 protein) (Joined to JAZF1 protein) (Suppressor of zeste 12 protein homolog)	605058	1043320	984672	793303	1056690	991959	871178	903748	1021070
RPTOR	Regulatory-associated protein of mTOR (Raptor) (p150 target of rapamycin (TOR)-scaffold protein)	97698.7	108800	107456	106136	95934.3	98446.4	112167	123790	128577
MYH11	Myosin-11 (Myosin heavy chain 11) (Myosin heavy chain, smooth muscle isoform) (SMMHC)	320438	497010	229114	252695	235462	293191	232758	307523	305228
CCT6B	T-complex protein 1 subunit zeta-2 (TCP-1-zeta-2) (CCT-zeta-2) (CCT-zeta-like) (TCP-1-zeta-like) (Testis-specific Tcp20) (Testis-specific protein TSA303)	323236	70587.1	31037.6	165363	36022.9		201648	128986	120242
AREL1	#N/A	98804.4	72986.6	58417.7	4411680	78982.8	35907.8	75432.7	74991.6	242437
MAP4K5	#N/A		25044.4	26782.4	27349	31837.3	31093.9	37132.5	28716.9	39971.9
NT5DC2	#N/A			24538.8	33974.5		13502.2		53788	25644.9
OAS3	#N/A	235690	176478	226218	221588	108348	204623	179700	352408	312005
INTS12	Integrator complex subunit 12 (Int12) (PHD finger protein 22)	205208	417962	469223	594899	483673	526433	410644	549833	417032
PRPF38B	Pre-mRNA-splicing factor 38B (Sarcoma antigen NY-SAR-27)	309479	276527	238685	265192	248060	335024	354020	327676	306608
CS	Citrate synthase, mitochondrial (EC 2.3.3.1) (Citrate (Si)-synthase)	372960	357926	337072	452248	287304	371310	393659	324531	356849
DHX35	Probable ATP-dependent RNA helicase DHX35 (EC 3.6.4.13) (DEAH box protein 35)	362338	346229	400263	290974	387653	373289	412470	408822	363650
QRICH1	Transcriptional regulator QRICH1 (Glutamine-rich protein 1)	33290.4	59437.8	44873.2	380393	43612.4	59486.5	13874.8	51476.9	38997.7
TTC27	Tetratricopeptide repeat protein 27 (TPR repeat protein 27)	45706	51109.8	36815.2		64534.2	47689.1	77356.3	77962.4	69911.2
ZC3H7B	Zinc finger CCCH domain-containing protein 7B (Rotavirus 'X'-associated non-structural protein) (RoXaN)	68040.3	37513.6	62584.3	28351.1	53442.8	70404.2	59018.1	107715	89461.8
WDR36	WD repeat-containing protein 36 (T-cell activation WD repeat-containing protein) (TA-WDRP)	2103660	3747540	3465680	2975790	3549860	2979540	2555630	2379590	2395780
TIMM44	Mitochondrial import inner membrane translocase subunit TIM44			34162		25882.4			42399
KARS1	Lysine--tRNA ligase (EC 2.7.7.-) (EC 6.1.1.6) (Lysyl-tRNA synthetase) (LysRS)	344717	375381	416086	716887	437880	457636	465224	420007	431395
MYL6	Myosin light polypeptide 6 (17 kDa myosin light chain) (LC17) (Myosin light chain 3) (MLC-3) (Myosin light chain alkali 3) (Myosin light chain A3) (Smooth muscle and nonmuscle myosin light chain alkali 6)	813741	565562	548703	792806	441654	643526	693622	484992	644507
TMCC1	#N/A	44187.6	33496.1	53146.5		43755.6	24166.6	45199	50313.6	50641.2
CST4	Cystatin-S (Cystatin-4) (Cystatin-SA-III) (Salivary acidic protein 1)	5164470	3367040	3021110	5896690	2575440	3143030	3028930	2494910	3267780
CST2	Cystatin-SA (Cystatin-2) (Cystatin-S5)	1172970	812095	731808	1263930	603009	808869	789618	649887	785597
THAP11	THAP domain-containing protein 11	314366	320899	372555	441226	341544	427230	374765	406793	377877
SUCLA2	Succinate--CoA ligase [ADP-forming] subunit beta, mitochondrial (EC 6.2.1.5) (ATP-specific succinyl-CoA synthetase subunit beta) (A-SCS) (Succinyl-CoA synthetase beta-A chain) (SCS-betaA)	365626	452684	520411	444922	526950	485379	624635	726607	605089
SNX5	Sorting nexin-5	73530.6	127087	107849	80936.7	95782	167204	167967	88789.1	104374
KDM5B	Lysine-specific demethylase 5B (EC 1.14.11.67) (Cancer/testis antigen 31) (CT31) (Histone demethylase JARID1B) (Jumonji/ARID domain-containing protein 1B) (PLU-1) (Retinoblastoma-binding protein 2 homolog 1) (RBP2-H1) ([histone H3]-trimethyl-L-lysine(4) demethylase 5B)	103467	636828	885085	576581	516598	294041	290514	381598	375153
ANXA6	Annexin A6 (67 kDa calelectrin) (Annexin VI) (Annexin-6) (Calphobindin-II) (CPB-II) (Chromobindin-20) (Lipocortin VI) (Protein III) (p68) (p70)	159954	115079	101404	200968	78008.3	128964	132384	100093	118812
PITRM1	Presequence protease, mitochondrial (hPreP) (EC 3.4.24.-) (Pitrilysin metalloproteinase 1) (Metalloprotease 1) (hMP1)		68348.9	44154.6	64943.4	57230.7	41983.1	88056.7	55144.3	66958.4
ABI1	Abl interactor 1 (Abelson interactor 1) (Abi-1) (Abl-binding protein 4) (AblBP4) (Eps8 SH3 domain-binding protein) (Eps8-binding protein) (Nap1-binding protein) (Nap1BP) (Spectrin SH3 domain-binding protein 1) (e3B1)	91686.1	68218.2	66189	213977	78842.4	111369	99394.9	80848.6	92737.7
WARS1	Tryptophan--tRNA ligase, cytoplasmic (EC 6.1.1.2) (Interferon-induced protein 53) (IFP53) (Tryptophanyl-tRNA synthetase) (TrpRS) (hWRS) [Cleaved into: T1-TrpRS; T2-TrpRS]	156451	153404	158358		119528	141216	132051	177649	153781
MED23	Mediator of RNA polymerase II transcription subunit 23 (Activator-recruited cofactor 130 kDa component) (ARC130) (Cofactor required for Sp1 transcriptional activation subunit 3) (CRSP complex subunit 3) (Mediator complex subunit 23) (Protein sur-2 homolog) (hSur-2) (Transcriptional coactivator CRSP130) (Vitamin D3 receptor-interacting protein complex 130 kDa component) (DRIP130)	193882	193382	191501	178609	216759	238367	213749	248322	248991
GMPPB	Mannose-1-phosphate guanyltransferase beta (EC 2.7.7.13) (GDP-mannose pyrophosphorylase B) (GTP-mannose-1-phosphate guanylyltransferase beta)	322078	230453	239533	201922	289420	238672	250179	340147	427863
DDX1	ATP-dependent RNA helicase DDX1 (EC 3.6.4.13) (DEAD box protein 1) (DEAD box protein retinoblastoma) (DBP-RB)	2627210	2930950	3056020	2714580	3028590	2793810	2865660	2614290	2325900
SRSF11	Serine/arginine-rich splicing factor 11 (Arginine-rich 54 kDa nuclear protein) (p54) (Splicing factor, arginine/serine-rich 11)	426203	177863			178478	164564	255715	157063	178689
POLR2E	DNA-directed RNA polymerases I, II, and III subunit RPABC1 (RNA polymerases I, II, and III subunit ABC1) (DNA-directed RNA polymerase II 23 kDa polypeptide) (DNA-directed RNA polymerase II subunit E) (RPB5 homolog) (XAP4)	493425	544809	507596	370350	506122	500336	482086	477210	513913
AP3B1	AP-3 complex subunit beta-1 (Adaptor protein complex AP-3 subunit beta-1) (Adaptor-related protein complex 3 subunit beta-1) (Beta-3A-adaptin) (Clathrin assembly protein complex 3 beta-1 large chain)	145473	147288	185560	153912	162757	115960	170088	164838	209112
NACA	Nascent polypeptide-associated complex subunit alpha, muscle-specific form (Alpha-NAC, muscle-specific form) (skNAC)	469893	464198	468118	593292	494360	556311	494545	569918	595796
CPSF3	Cleavage and polyadenylation specificity factor subunit 3 (EC 3.1.27.-) (Cleavage and polyadenylation specificity factor 73 kDa subunit) (CPSF 73 kDa subunit) (mRNA 3'-end-processing endonuclease CPSF-73)	747293	716489	818148	717972	889498	934237	966391	892229	910918
NOM1	#N/A	147243	177627	186316	110724	95313.3	137740	204109	165156	182798
WASHC5	WASH complex subunit 5 (Strumpellin) (WASH complex subunit strumpellin)									29067.6
UTP6	U3 small nucleolar RNA-associated protein 6 homolog (Hepatocellular carcinoma-associated antigen 66) (Multiple hat domains protein)	1269560	1353660	1311580	1058970	1365220	930872	1093210	988130	889212
NCOA3	Nuclear receptor coactivator 3 (NCoA-3) (EC 2.3.1.48) (ACTR) (Amplified in breast cancer 1 protein) (AIB-1) (CBP-interacting protein) (pCIP) (Class E basic helix-loop-helix protein 42) (bHLHe42) (Receptor-associated coactivator 3) (RAC-3) (Steroid receptor coactivator protein 3) (SRC-3) (Thyroid hormone receptor activator molecule 1) (TRAM-1)	132300	167817	153379	130561	185379	168217	179409	157710	84169.3
NFKB2	Nuclear factor NF-kappa-B p100 subunit (DNA-binding factor KBF2) (H2TF1) (Lymphocyte translocation chromosome 10 protein) (Nuclear factor of kappa light polypeptide gene enhancer in B-cells 2) (Oncogene Lyt-10) (Lyt10) [Cleaved into: Nuclear factor NF-kappa-B p52 subunit]	309524	301408	314980	304028	394706	500959	374179	553890	505532
EEF2	Elongation factor 2 (EF-2) (EC 3.6.5.-)	3623130	3483950	3456780	12282000	3325190	4143170	4302300	3836670	4006030
EMSY	BRCA2-interacting transcriptional repressor EMSY	212910	291684	271769	104641	248059	295300	317714	283221	281485
RFC2	Replication factor C subunit 2 (Activator 1 40 kDa subunit) (A1 40 kDa subunit) (Activator 1 subunit 2) (Replication factor C 40 kDa subunit) (RF-C 40 kDa subunit) (RFC40)	191576	241950	184632	240115	242127	280635	348167	236348	275094
ARHGEF37	#N/A	274139	261529	243610	119845	304277	178711	187814	204472	140317
TRIM24	Transcription intermediary factor 1-alpha (TIF1-alpha) (EC 2.3.2.27) (E3 ubiquitin-protein ligase TRIM24) (RING finger protein 82) (RING-type E3 ubiquitin transferase TIF1-alpha) (Tripartite motif-containing protein 24)	637977	2340260	2344190	1833890	2427800	3022310	2676490	2952780	3019890
STAT1	Signal transducer and activator of transcription 1-alpha/beta (Transcription factor ISGF-3 components p91/p84)	616983	839371	739697	719350	734862	966730	925178	1404000	1479780
RNF216	E3 ubiquitin-protein ligase RNF216 (EC 2.3.2.27) (RING finger protein 216) (RING-type E3 ubiquitin transferase RNF216) (Triad domain-containing protein 3) (Ubiquitin-conjugating enzyme 7-interacting protein 1) (Zinc finger protein inhibiting NF-kappa-B)	43844.3	147588	146979	106141	204767	196595	146742	219122	265882
GLA	#N/A				160480
PA2G4	Proliferation-associated protein 2G4 (Cell cycle protein p38-2G4 homolog) (hG4-1) (ErbB3-binding protein 1)	2092300	2291270	2262870	2113970	2187840	2428950	2622530	2647750	2461960
HEXA	#N/A				107768
GAK	Cyclin-G-associated kinase (EC 2.7.11.1)	79431	33467	72626.7		84288.6	81063	77620	87356.5	106783
RBCK1	#N/A	62109.9	100407	90368.1		145601	73426.2	136786	193237	184904
GSR	Glutathione reductase, mitochondrial (GR) (GRase) (EC 1.8.1.7)	115446	81902.4	64993.3	195829	52042	63868.7	91466.1	68565.5	98480.8
MAP4K2	Mitogen-activated protein kinase kinase kinase kinase 2 (EC 2.7.11.1) (B lymphocyte serine/threonine-protein kinase) (Germinal center kinase) (GC kinase) (MAPK/ERK kinase kinase kinase 2) (MEK kinase kinase 2) (MEKKK 2) (Rab8-interacting protein)			43491.2		45752.5		90701.5	51816.6
HTRA2	Serine protease HTRA2, mitochondrial (EC 3.4.21.108) (High temperature requirement protein A2) (HtrA2) (Omi stress-regulated endoprotease) (Serine protease 25) (Serine proteinase OMI)	28969.8	56039.9	39774.5	64110.7	29142.1	34037.3	67475.6	39240.8	69600
USP48	Ubiquitin carboxyl-terminal hydrolase 48 (EC 3.4.19.12) (Deubiquitinating enzyme 48) (Ubiquitin thioesterase 48) (Ubiquitin-specific peptidase 48) (Ubiquitin-specific protease 48) (Ubiquitin-specific-processing protease 48)	274801	273128	300774	224865	305479	336459	302142	293104	298788
KIF22	Kinesin-like protein KIF22 (Kinesin-like DNA-binding protein) (Kinesin-like protein 4)	299909	462237	390014	315140	397596	321316	270426	323916	251863
ASMTL	#N/A	65381.4	99040.3	107478		97131.3	146269	92529.1	89993.8	90786.9
NARS1	Asparagine--tRNA ligase, cytoplasmic (EC 6.1.1.22) (Asparaginyl-tRNA synthetase) (AsnRS) (Asparaginyl-tRNA synthetase 1)	1400750	1194220	1327220	1051980	1389040	986424	1004890	1183730	798324
	#N/A	111080	162645	153979	145031	172490	113803	70966.7	123178	64589.3
SLU7	Pre-mRNA-splicing factor SLU7 (hSlu7)	196796	280581	246918	237699	269502	210716	250442	179298	221568
COPG1	Coatomer subunit gamma-1 (Gamma-1-coat protein) (Gamma-1-COP)	442014	476501	500557	406604	491181	532721	542508	531870	664009
MCM3AP	#N/A	165479	118251	145182	168642	138156	142294	61050.9	127121	120286
PHF8	Histone lysine demethylase PHF8 (EC 1.14.11.27) (EC 1.14.11.65) (PHD finger protein 8) ([histone H3]-dimethyl-L-lysine(36) demethylase PHF8) ([histone H3]-dimethyl-L-lysine(9) demethylase PHF8)	815265	1007260	1006590	736863	959714	864390	849056	741641	718452
CYFIP1	Cytoplasmic FMR1-interacting protein 1	12248.3	61023	40793.8		30684.4	41361.2	36050	18573.6	46607.7
	Cytoplasmic FMR1-interacting protein 1 (Specifically Rac1-associated protein 1) (Sra-1) (p140sra-1)	119400	131566	106692	245470	116871	119719	126714	147655	152512
EIF5	Eukaryotic translation initiation factor 5 (eIF-5)	182263	192022	203663	150553	149184	233250	235341	151463	194166
S100A8	Protein S100-A8 (Calgranulin-A) (Calprotectin L1L subunit) (Cystic fibrosis antigen) (CFAG) (Leukocyte L1 complex light chain) (Migration inhibitory factor-related protein 8) (MRP-8) (p8) (S100 calcium-binding protein A8) (Urinary stone protein band A)	5020000	3146150	2894780	4944940	2438370	3149790	3120460	2813230	3072790
DSG1	Desmoglein-1 (Cadherin family member 4) (Desmosomal glycoprotein 1) (DG1) (DGI) (Pemphigus foliaceus antigen)	2548850	2863220	1449790	42343900	2115130	1987550	2528420	2366890	6061260
IGHG1	Immunoglobulin heavy constant gamma 1 (Ig gamma-1 chain C region) (Ig gamma-1 chain C region EU) (Ig gamma-1 chain C region KOL) (Ig gamma-1 chain C region NIE)	97112000	67262400	57325400	87984500	75705100	63537600	63735600	61998300	72038200
PGAM1	Phosphoglycerate mutase 1 (EC 5.4.2.11) (EC 5.4.2.4) (BPG-dependent PGAM 1) (Phosphoglycerate mutase isozyme B) (PGAM-B)	232155	120246	152352	537914	166672	118555	117989	161469	392765
SLC29A3	#N/A		42930.7	16883.4	1091080	25004.4	10246.6	31008.4	45657	145906
HP1BP3	Heterochromatin protein 1-binding protein 3 (Protein HP1-BP74)	352794	629583	629683	410013	454072	819002	693353	630827	625062
MOGS	Mannosyl-oligosaccharide glucosidase (EC 3.2.1.106) (Processing A-glucosidase I)	1027160	924783	1064460	665092	905810	984986	1044730	816239	851285
ELMO2	Engulfment and cell motility protein 2 (Protein ced-12 homolog A) (hCed-12A)		75780.2	58564.6		86551	91147.2	79807.5	89924.4	132032
PRPF19	Pre-mRNA-processing factor 19 (EC 2.3.2.27) (Nuclear matrix protein 200) (PRP19/PSO4 homolog) (hPso4) (RING-type E3 ubiquitin transferase PRP19) (Senescence evasion factor)	16575200	16497500	15848100	14230700	16862600	14224500	13760700	13749800	15772200
AGT	Angiotensinogen (Serpin A8) [Cleaved into: Angiotensin-1 (Angiotensin 1-10) (Angiotensin I) (Ang I); Angiotensin-2 (Angiotensin 1-8) (Angiotensin II) (Ang II); Angiotensin-3 (Angiotensin 2-8) (Angiotensin III) (Ang III) (Des-Asp[1]-angiotensin II); Angiotensin-4 (Angiotensin 3-8) (Angiotensin IV) (Ang IV); Angiotensin 1-9; Angiotensin 1-7; Angiotensin 1-5; Angiotensin 1-4]	385220	272698	212442	386090	271372	261330	227569	220750	230379
CCT6A	T-complex protein 1 subunit zeta (TCP-1-zeta) (Acute morphine dependence-related protein 2) (CCT-zeta-1) (HTR3) (Tcp20)	3036780	2890610	3154920	3371930	3443020	3268760	3631490	4286580	3986270
RNF40	#N/A	41170.1	67691.3	79554.2	32606.9	75036.8	93142.7	106417	81528.9	109361
TRIP12	E3 ubiquitin-protein ligase TRIP12 (EC 2.3.2.26) (E3 ubiquitin-protein ligase for Arf) (ULF) (HECT-type E3 ubiquitin transferase TRIP12) (Thyroid receptor-interacting protein 12) (TR-interacting protein 12) (TRIP-12)	420330	552763	544661	354395	497265	528531	470268	487774	459173
GBA1	Lysosomal acid glucosylceramidase (Lysosomal acid GCase) (EC 3.2.1.45) (Acid beta-glucosidase) (Alglucerase) (Beta-glucocerebrosidase) (Beta-GC) (Beta-glucosylceramidase 1) (Cholesterol glucosyltransferase) (SGTase) (EC 2.4.1.-) (Cholesteryl-beta-glucosidase) (EC 3.2.1.-) (D-glucosyl-N-acylsphingosine glucohydrolase) (Glucosylceramidase beta 1) (Imiglucerase) (Lysosomal cholesterol glycosyltransf…	322592	222516	200268	6949390	197312	230134	240736	198421	340643
SMAD4	Mothers against decapentaplegic homolog 4 (MAD homolog 4) (Mothers against DPP homolog 4) (Deletion target in pancreatic carcinoma 4) (SMAD family member 4) (SMAD 4) (Smad4) (hSMAD4)	7196.68	44003.1	42834.4		35753.8	24388.6		27362.2
DDX31	Probable ATP-dependent RNA helicase DDX31 (EC 3.6.4.13) (DEAD box protein 31) (Helicain)	438356	424951	435680	330777	417003	449594	460673	410855	376085
SNX9	Sorting nexin-9 (SH3 and PX domain-containing protein 1) (Protein SDP1) (SH3 and PX domain-containing protein 3A)	148753	129692	134359	176170	144379	177492	166802	131034	116852
STAG1	Cohesin subunit SA-1 (SCC3 homolog 1) (Stromal antigen 1)	90657.7	240801	200516	221186	201541	187010	219518	137745	164272
NEK7	Serine/threonine-protein kinase Nek7 (EC 2.7.11.34) (Never in mitosis A-related kinase 7) (NimA-related protein kinase 7)	93175.6	130066	134999	174990	124750	169353	191863	133527	146845
CORO7	Coronin-7 (Crn7) (70 kDa WD repeat tumor rejection antigen homolog)	436949	513987	618029	414617	542657	644130	707416	635676	678686
HNRNPK	Heterogeneous nuclear ribonucleoprotein K (hnRNP K) (Transformation up-regulated nuclear protein) (TUNP)	5917230	6061750	5579230	5061200	5747000	6146280	6230550	4886060	5137830
RPL36	Large ribosomal subunit protein eL36 (60S ribosomal protein L36)	543403	727546	795730	555805	778755	949624	899826	989444	708381
PRMT3	Protein arginine N-methyltransferase 3 (EC 2.1.1.319) (Heterogeneous nuclear ribonucleoprotein methyltransferase-like protein 3)	443084	389964	488601	600584	477852	502559	426217	562701	527443
ZBTB5	#N/A		21157.2	23194.1		31550.6	26237.7	37865.6	16216.9	24035.6
NDUFS1	NADH-ubiquinone oxidoreductase 75 kDa subunit, mitochondrial (EC 7.1.1.2) (Complex I-75kD) (CI-75kD)	548941	764936	1254910	933233	1019180	1162900	1296480	1387250	1296530
MGST1	#N/A			33758.2	208826	26577.7				31620.4
NOSIP	Nitric oxide synthase-interacting protein (E3 ubiquitin-protein ligase NOSIP) (EC 2.3.2.27) (RING-type E3 ubiquitin transferase NOSIP) (eNOS-interacting protein)	53808	102015	70680.3	176628	89991.6	123463	145803	100159	77826.5
HBS1L	HBS1-like protein (EC 3.6.5.-) (ERFS)	108925	115134	111857	138547	155308	160355	148740	144821	167011
NUP98	Nuclear pore complex protein Nup98-Nup96 (EC 3.4.21.-) [Cleaved into: Nuclear pore complex protein Nup98 (98 kDa nucleoporin) (Nucleoporin Nup98) (Nup98); Nuclear pore complex protein Nup96 (96 kDa nucleoporin) (Nucleoporin Nup96) (Nup96)]	562118	785875	793745	576874	683603	698235	676026	647954	774815
KMT2A	Histone-lysine N-methyltransferase 2A (Lysine N-methyltransferase 2A) (EC 2.1.1.364) (ALL-1) (CXXC-type zinc finger protein 7) (Cysteine methyltransferase KMT2A) (EC 2.1.1.-) (Myeloid/lymphoid or mixed-lineage leukemia) (Myeloid/lymphoid or mixed-lineage leukemia protein 1) (Trithorax-like protein) (Zinc finger protein HRX) [Cleaved into: MLL cleavage product N320 (N-terminal cleavage product of …	131956	226660	224416	188389	176362	157999	185647	183168	198869
GCA	Grancalcin	133828	122156	112698	161334	88344.4	74375.1	133103	76576.1	142421
USP9X	Probable ubiquitin carboxyl-terminal hydrolase FAF-X (EC 3.4.19.12) (Deubiquitinating enzyme FAF-X) (Fat facets in mammals) (hFAM) (Fat facets protein-related, X-linked) (Ubiquitin thioesterase FAF-X) (Ubiquitin-specific protease 9, X chromosome) (Ubiquitin-specific-processing protease FAF-X)	167194	176540	180127	164490	209350	226421	216653	207207	238292
EIPR1	EARP and GARP complex-interacting protein 1 (Endosome-associated recycling protein-interacting protein) (Golgi-associated retrograde protein-interacting protein) (Tumor-suppressing STF cDNA 1 protein) (Tumor-suppressing subchromosomal transferable fragment candidate gene 1 protein)	100268	87814.1	119424	128845	134146	135898	149115	184924	205100
CUL2	Cullin-2 (CUL-2)	219825	205533	183172	220978	213726	216465	188780	304781	324348
SMPD1	#N/A				106304
TUBB2A	Tubulin beta-2A chain (Tubulin beta class IIa)	232175	171011	161484	215491	144935	185897	189897	169440	213291
RPS16	Small ribosomal subunit protein uS9 (40S ribosomal protein S16)	2464850	2501550	2326570	2838160	1992390	3213180	3220940	2916110	2757530
RPL14	Large ribosomal subunit protein eL14 (60S ribosomal protein L14) (CAG-ISL 7)	1037630	1163030	908036	1600240	1088550	956993	987743	1335460	1381580
GUF1	Translation factor GUF1, mitochondrial (EC 3.6.5.-) (Elongation factor 4 homolog) (EF-4) (GTPase GUF1) (Ribosomal back-translocase)		71339.9	63493.4	99516.1	70393.8	49969.5	51503.8	81196.2	39020.5
AMY1A;AMY1B;AMY1C	Alpha-amylase 1B (EC 3.2.1.1)	25001600	18762400	16072600	31819600	15408300	17333900	16878500	15185700	17794800
CBL	#N/A		86452	75642		67416.5	116900	82778	98737.5	245557
EHMT2	Histone-lysine N-methyltransferase EHMT2 (EC 2.1.1.-) (EC 2.1.1.367) (Euchromatic histone-lysine N-methyltransferase 2) (HLA-B-associated transcript 8) (Histone H3-K9 methyltransferase 3) (H3-K9-HMTase 3) (Lysine N-methyltransferase 1C) (Protein G9a)	616616	1123150	1269470	952633	1233630	1062880	1102730	757161	951609
WDR75	WD repeat-containing protein 75 (U3 small nucleolar RNA-associated protein 17 homolog)	1618810	3068020	2803520	2373400	2871930	2261080	2113590	1777010	1998350
IMPA2	Inositol monophosphatase 2 (IMP 2) (IMPase 2) (EC 3.1.3.25) (Inositol-1(or 4)-monophosphatase 2) (Myo-inositol monophosphatase A2)	249831	183677	114734	2534620	177753	119511	189183	233859	325125
DROSHA	Ribonuclease 3 (EC 3.1.26.3) (Protein Drosha) (Ribonuclease III) (RNase III) (p241)	129196	102406	132424	84547.8	137851	138887	158030	153012	139317
POR	NADPH--cytochrome P450 reductase (CPR) (P450R) (EC 1.6.2.4)	263713	258921	256981	329606	227286	315586	325867	285848	255321
CUL3	Cullin-3 (CUL-3)	406125	621798	608025	634930	693066	613014	624076	622465	617041
DDB1	DNA damage-binding protein 1 (DDB p127 subunit) (DNA damage-binding protein a) (DDBa) (Damage-specific DNA-binding protein 1) (HBV X-associated protein 1) (XAP-1) (UV-damaged DNA-binding factor) (UV-damaged DNA-binding protein 1) (UV-DDB 1) (XPE-binding factor) (XPE-BF) (Xeroderma pigmentosum group E-complementing protein) (XPCe)	2005540	2359450	2488620	2260890	2340280	2130480	1908650	2111200	2143460
DHX15	ATP-dependent RNA helicase DHX15 (EC 3.6.4.13) (ATP-dependent RNA helicase #46) (DEAH box protein 15) (Splicing factor Prp43) (hPrp43)	2737460	2631660	2654580	2247320	2623420	2820650	2727900	2531470	2566350
DDX51	ATP-dependent RNA helicase DDX51 (EC 3.6.4.13) (DEAD box protein 51)	94349.9	126268	123147	120165	122839	85896.5	126552	136895	125058
GNA13	Guanine nucleotide-binding protein subunit alpha-13 (G alpha-13) (G-protein subunit alpha-13)		96279.1	72707	102483	100653	87921.7	87519.2	100123	132235
LMNB2	Lamin-B2	406582	797046	759414	521184	683379	964853	857451	1086860	1192730
STXBP3	Syntaxin-binding protein 3 (Platelet Sec1 protein) (PSP) (Protein unc-18 homolog 3) (Unc18-3) (Protein unc-18 homolog C) (Unc-18C)		39994.7	39041.1		25756.4	25664.4		45037.4	53075.3
MME	#N/A		26995.9			26271.9	22811.2	16267.5
PAK2	#N/A		45814.1	81711.8		59195.6	84426	96685.4	83293.7	74589.7
CP	Ceruloplasmin (EC 1.16.3.1) (Ferroxidase)	1050380	685811	628042	1203200	693785	660798	661572	630577	742977
PNPT1	Polyribonucleotide nucleotidyltransferase 1, mitochondrial (EC 2.7.7.8) (3'-5' RNA exonuclease OLD35) (PNPase old-35) (Polynucleotide phosphorylase 1) (PNPase 1) (Polynucleotide phosphorylase-like protein)	317237	329307	328615	216429	335942	422144	333269	416056	360677
PSD4	#N/A		21987.4	26143.3			33603.5		49751.2
RBM41	#N/A			174107		267624	223758	215908	166541	159620
POLDIP3	Polymerase delta-interacting protein 3 (46 kDa DNA polymerase delta interaction protein) (p46) (S6K1 Aly/REF-like target) (SKAR)	120211	130183	135489	114676	157245	197584	83190.7	172728	177480
MRPL9	#N/A	246429	176746	236360	105932	222725	254968	220012	228349	265032
BRMS1L	Breast cancer metastasis-suppressor 1-like protein (BRMS1-homolog protein p40) (BRMS1-like protein p40)		112773	97979		80507.7	77183.1	77193.3	61573	44607
MINK1	#N/A		28916.8	32261.9	56746.5	29796.7		28640.4	36967.4	16875
PLCB3	#N/A				156685
MEMO1	Protein MEMO1 (C21orf19-like protein) (Hepatitis C virus NS5A-transactivated protein 7) (HCV NS5A-transactivated protein 7) (Mediator of ErbB2-driven cell motility 1) (Mediator of cell motility 1) (Memo-1)	475845	499031	515821	1267230	737637	582654	531477	664676	821495
PSMC3	26S proteasome regulatory subunit 6A (26S proteasome AAA-ATPase subunit RPT5) (Proteasome 26S subunit ATPase 3) (Proteasome subunit P50) (Tat-binding protein 1) (TBP-1)	394939	307087	316439	448955	339085	328310	462157	310219	463845
FANCI	Fanconi anemia group I protein (Protein FACI)	78349.5	76524.1	64602.1	173237	102771	62647.3	81955.7	71394.8	60620.1
RBBP7	Histone-binding protein RBBP7 (Histone acetyltransferase type B subunit 2) (Nucleosome-remodeling factor subunit RBAP46) (Retinoblastoma-binding protein 7) (RBBP-7) (Retinoblastoma-binding protein p46)	300133	451628	411647	264008	403854	375072	412113	367057	410110
MORC2	ATPase MORC2 (EC 3.6.1.-) (MORC family CW-type zinc finger protein 2) (Zinc finger CW-type coiled-coil domain protein 1)	271652	575690	537971	334992	466840	331841	348591	254994	269379
BRD7	Bromodomain-containing protein 7 (75 kDa bromodomain protein) (Protein CELTIX-1)	118824	142331	116789	52066.3	141991	88792.1	77720.6	99574.9	107502
GNAI2	Guanine nucleotide-binding protein G(i) subunit alpha-2 (Adenylate cyclase-inhibiting G alpha protein)	3309820	3301650	4218750	4476200	3737750	3869510	4146110	4727810	4150810
LAS1L	Ribosomal biogenesis protein LAS1L (Protein LAS1 homolog)	157699	208559	193418	363204	186932	241563	236230	217641	244954
MRPS34	Small ribosomal subunit protein mS34 (28S ribosomal protein S34, mitochondrial) (MRP-S34) (S34mt)	553063	675996	430516	583631	775167	790156	821453	916360	527412
DNAH1	#N/A	136158		19459.9		49949	46067.9		35393.4	65470
ABCF2	ATP-binding cassette sub-family F member 2 (Iron-inhibited ABC transporter 2)	727063	670287	717478	631884	734106	826227	901456	913832	846560
YARS1	Tyrosine--tRNA ligase, cytoplasmic (EC 6.1.1.1) (Tyrosyl-tRNA synthetase) (TyrRS) [Cleaved into: Tyrosine--tRNA ligase, cytoplasmic, N-terminally processed]	283402	246600	246313	805388	257896	256168	250896	221967	278167
POLD3	DNA polymerase delta subunit 3 (DNA polymerase delta subunit C) (DNA polymerase delta subunit p66) (DNA polymerase delta subunit p68)	35796.2	136575	102834	101314	126582	104835	145429	134293	156980
GTF2B	Transcription initiation factor IIB (EC 2.3.1.48) (General transcription factor TFIIB) (S300-II)		104998	97412.4		110348	116884	128437	89571.9	87986.5
RBM3	RNA-binding protein 3 (RNA-binding motif protein 3) (RNPL)	210077	128047	127724	136014	134860	120358	87790.5	115743	145365
TNRC6B	Trinucleotide repeat-containing gene 6B protein	1546710	1341900	1421950	738598	1358900	1185340	1387920	1711140	1594870
EFL1	#N/A			97121.5		99570.7	79660	107368	126221	118780
MED16	Mediator of RNA polymerase II transcription subunit 16 (Mediator complex subunit 16) (Thyroid hormone receptor-associated protein 5) (Thyroid hormone receptor-associated protein complex 95 kDa component) (Trap95) (Vitamin D3 receptor-interacting protein complex 92 kDa component) (DRIP92)	498248	481892	430565	316287	449440	412502	475031	502598	521365
DUS3L	tRNA-dihydrouridine(47) synthase [NAD(P)(+)]-like (EC 1.3.1.89) (mRNA-dihydrouridine synthase DUS3L) (EC 1.3.1.-) (tRNA-dihydrouridine synthase 3-like)	185328	174845	184950	129074	184167	238977	227451	224909	144819
ORC5	Origin recognition complex subunit 5	203771	221067	210359	112323	199009	196371	222771	166903	165725
DBNL	Drebrin-like protein (Cervical SH3P7) (Cervical mucin-associated protein) (Drebrin-F) (HPK1-interacting protein of 55 kDa) (HIP-55) (SH3 domain-containing protein 7)	172324	184699	170677	244418	201148	217039	205960	157644	223467
ZMYND8	MYND-type zinc finger-containing chromatin reader ZMYND8 (Cutaneous T-cell lymphoma-associated antigen se14-3) (CTCL-associated antigen se14-3) (Protein kinase C-binding protein 1) (Rack7) (Transcription coregulator ZMYND8) (Zinc finger MYND domain-containing protein 8)		399592	388546	147452	389091	212005	180290	192309	161900
WDR33	pre-mRNA 3' end processing protein WDR33 (WD repeat-containing protein 33) (WD repeat-containing protein of 146 kDa)	933075	910877	915809	612382	983585	868220	863004	833358	856236
KMT2B	Histone-lysine N-methyltransferase 2B (Lysine N-methyltransferase 2B) (EC 2.1.1.364) (Myeloid/lymphoid or mixed-lineage leukemia protein 4) (Trithorax homolog 2) (WW domain-binding protein 7) (WBP-7)	129548	207895	201935	137359	199636	138898	143669	120369	130737
SORBS3	#N/A								25168	65333.7
YME1L1	ATP-dependent zinc metalloprotease YME1L1 (EC 3.4.24.-) (ATP-dependent metalloprotease FtsH1) (Meg-4) (Presenilin-associated metalloprotease) (PAMP) (YME1-like protein 1)	112414	91631.6	155030	81751.7	86041.3	117682	111821	116941	96507.5
CEP43	#N/A	200740	139539	115370	215014	99716.7	147098	139138	141056	141857
FEM1B	Protein fem-1 homolog B (FEM1b) (FEM1-beta) (Fem-1-like death receptor-binding protein alpha) (Fem-1-like in apoptotic pathway protein alpha) (F1A-alpha)	112940	123558	43223.8	67873.5	87174.7	149446	149033	190424	129433
PIK3R4	Phosphoinositide 3-kinase regulatory subunit 4 (PI3-kinase regulatory subunit 4) (EC 2.7.11.1) (PI3-kinase p150 subunit) (Phosphoinositide 3-kinase adaptor protein)	225577	354239	514827		467401	576024	362239	434590	474450
USP39	Ubiquitin carboxyl-terminal hydrolase 39 (EC 3.4.19.12) (SAD1 homolog) (U4/U6.U5 tri-snRNP-associated 65 kDa protein)	695967	837587	936080	829826	878586	805340	651344	803343	776745
CDC16	Cell division cycle protein 16 homolog (Anaphase-promoting complex subunit 6) (APC6) (CDC16 homolog) (CDC16Hs) (Cyclosome subunit 6)	391187	537340	466015	397342	545030	430783	435584	466807	409744
HNRNPUL2	Heterogeneous nuclear ribonucleoprotein U-like protein 2 (Scaffold-attachment factor A2) (SAF-A2)	4119690	4636750	4757630	3776370	4428960	4062480	3853570	3601440	3660750
ESPL1	Separin (EC 3.4.22.49) (Caspase-like protein ESPL1) (Extra spindle poles-like 1 protein) (Separase)	92409.9	112949	65657.3	49367.1	73670.2	91863.6	84624.8	81385.4	77004
LARS1	Leucine--tRNA ligase, cytoplasmic (EC 6.1.1.4) (Leucyl-tRNA synthetase) (LeuRS)	451130	448378	499461	525268	525521	572887	560161	640158	594427
RPL26	Large ribosomal subunit protein uL24 (60S ribosomal protein L26)	4102880	3906540	4415910	4613030	3569940	4523420	4551590	4512200	4238120
INTS2	Integrator complex subunit 2 (Int2)	308023	400949	496894	281858	384991	445681	381423	499395	479871
IMP4	U3 small nucleolar ribonucleoprotein protein IMP4 (U3 snoRNP protein IMP4) (Brix domain-containing protein 4)	3131910	3542480	3479760	2513030	3594160	2805950	2710400	2609490	2510110
SQLE	Squalene monooxygenase (EC 1.14.14.17) (Squalene epoxidase) (SE)			220230			243457	178142	320115
RAB8A	Ras-related protein Rab-8A (EC 3.6.5.2) (Oncogene c-mel)	214155	213936	231753	256484	262251	245277	211471	212049	230362
EIF3H	Eukaryotic translation initiation factor 3 subunit H (eIF3h) (Eukaryotic translation initiation factor 3 subunit 3) (eIF-3-gamma) (eIF3 p40 subunit)	808405	771389	705820	862273	744105	866982	1085840	965284	897750
PRMT1	Protein arginine N-methyltransferase 1 (EC 2.1.1.319) (Histone-arginine N-methyltransferase PRMT1) (Interferon receptor 1-bound protein 4)	2027190	1904720	2110220	2143980	2099680	2336050	2402120	2325710	2111190
PDHX	#N/A		38115.5	30637.2		41861.1		55935.3	43600.7	54189.3
RECQL5	#N/A		55986.3	47051.8		51658.5	41743.6	55711	29809.9	40086.7
LNPEP	Leucyl-cystinyl aminopeptidase (Cystinyl aminopeptidase) (EC 3.4.11.3) (Insulin-regulated membrane aminopeptidase) (Insulin-responsive aminopeptidase) (IRAP) (Oxytocinase) (OTase) (Placental leucine aminopeptidase) (P-LAP) [Cleaved into: Leucyl-cystinyl aminopeptidase, pregnancy serum form]		44409.5		307886		114616		34969.7	52444.9
ARMC8	#N/A		64308.6	58756.3	50312.1	51156	63034.4	83895.9	95844	54709.1
AAR2	#N/A		233180	301717		372984	226697	260094	271184	489994
APOL1	Apolipoprotein L1 (Apolipoprotein L) (Apo-L) (ApoL) (Apolipoprotein L-I) (ApoL-I)	421805	278797	284962	327767	293967	234559	259686	221978	356887
OSBPL8	Oxysterol-binding protein-related protein 8 (ORP-8) (OSBP-related protein 8)	150034	151946	121545	136196	89880.2	161597	194272	165254	216479
NCBP1	Nuclear cap-binding protein subunit 1 (80 kDa nuclear cap-binding protein) (CBP80) (NCBP 80 kDa subunit)	55284.7	59472.3	91657.2	77714	85359.7	85052.8	103531	87052	105623
XRCC5	X-ray repair cross-complementing protein 5 (EC 3.6.4.-) (86 kDa subunit of Ku antigen) (ATP-dependent DNA helicase 2 subunit 2) (ATP-dependent DNA helicase II 80 kDa subunit) (CTC box-binding factor 85 kDa subunit) (CTC85) (CTCBF) (DNA repair protein XRCC5) (Ku80) (Ku86) (Lupus Ku autoantigen protein p86) (Nuclear factor IV) (Thyroid-lupus autoantigen) (TLAA) (X-ray repair complementing defective…	442782	273018	227756	437690	188844	235381	259584	220021	229966
SMARCA5	SWI/SNF-related matrix-associated actin-dependent regulator of chromatin subfamily A member 5 (SWI/SNF-related matrix-associated actin-dependent regulator of chromatin A5) (EC 3.6.4.-) (Sucrose nonfermenting protein 2 homolog) (hSNF2H)	5541310	7375470	7298980	5682320	6824980	5960310	5807550	5029420	5332150
SERPINC1	Antithrombin-III (ATIII) (Serpin C1)	1178130	932049	850386	1229480	872640	867174	906952	829065	990928
BMP2K	BMP-2-inducible protein kinase (BIKe) (EC 2.7.11.1)	430399	432249	475789	376446	433124	618532	649468	647602	712809
NOP14	Nucleolar protein 14 (Nucleolar complex protein 14)	219885	378040	329077	181423	408692	295063	279934	205577	212613
ATP6AP2	#N/A				94910.1
CD2AP	#N/A		55583.9				39812
SDCBP	Syntenin-1 (Melanoma differentiation-associated protein 9) (MDA-9) (Pro-TGF-alpha cytoplasmic domain-interacting protein 18) (TACIP18) (Scaffold protein Pbp1) (Syndecan-binding protein 1)	89461.6	70894.3	76977	100965	61727.4	67640.5	85270.9	66356.6	93963.6
RALA	Ras-related protein Ral-A (EC 3.6.5.2)	289830	223979	254325	628017	195690	201555	144382	204457	181854
SEPTIN7	Septin-7 (CDC10 protein homolog)	507032	562767	503191	560096	406474	481806	537883	432627	495569
MTHFD1	C-1-tetrahydrofolate synthase, cytoplasmic (C1-THF synthase) (Epididymis secretory sperm binding protein) [Cleaved into: C-1-tetrahydrofolate synthase, cytoplasmic, N-terminally processed] [Includes: Methylenetetrahydrofolate dehydrogenase (EC 1.5.1.5); Methenyltetrahydrofolate cyclohydrolase (EC 3.5.4.9); Formyltetrahydrofolate synthetase (EC 6.3.4.3)]	287056	279049	257439	474295	229771	312598	309636	273972	305583
SETDB1	Histone-lysine N-methyltransferase SETDB1 (EC 2.1.1.366) (ERG-associated protein with SET domain) (ESET) (Histone H3-K9 methyltransferase 4) (H3-K9-HMTase 4) (Lysine N-methyltransferase 1E) (SET domain bifurcated 1)	206723	167607	183470		173314	249724	168812	191509	206278
TSC2	#N/A	161580	121284	118041	208480	93034	117610	125864	100253	109245
PML	Protein PML (E3 SUMO-protein ligase PML) (EC 2.3.2.-) (Promyelocytic leukemia protein) (RING finger protein 71) (RING-type E3 SUMO transferase PML) (Tripartite motif-containing protein 19) (TRIM19)	174863	9803960	8210280	7662500	9481610	4485650	850512	6516050	7644810
RP2	#N/A		82153.3	78529.3	120187	82652.6	84274.1	66944.5	93129.7	79750
MTARC2	Mitochondrial amidoxime reducing component 2 (mARC2) (EC 1.7.-.-) (Molybdenum cofactor sulfurase C-terminal domain-containing protein 2) (MOSC domain-containing protein 2) (Moco sulfurase C-terminal domain-containing protein 2)	603572	690268	894726	699048	628353	790667	1014010	1122650	1032850
METTL16	RNA N6-adenosine-methyltransferase METTL16 (Methyltransferase 10 domain-containing protein) (Methyltransferase-like protein 16) (N6-adenosine-methyltransferase METTL16) (EC 2.1.1.348) (U6 small nuclear RNA (adenine-(43)-N(6))-methyltransferase) (EC 2.1.1.346)	210942	352074	240213	240394	318804	404617	341117	375279	364536
MAPK1	Mitogen-activated protein kinase 1 (MAP kinase 1) (MAPK 1) (EC 2.7.11.24) (ERT1) (Extracellular signal-regulated kinase 2) (ERK-2) (MAP kinase isoform p42) (p42-MAPK) (Mitogen-activated protein kinase 2) (MAP kinase 2) (MAPK 2)	206762	189565	218406	289275	180095	245567	289192	240064	230769
CDK7	Cyclin-dependent kinase 7 (EC 2.7.11.22) (EC 2.7.11.23) (39 kDa protein kinase) (p39 Mo15) (CDK-activating kinase 1) (Cell division protein kinase 7) (Serine/threonine-protein kinase 1) (TFIIH basal transcription factor complex kinase subunit)	85878.2	143195	122591	156780	113466	193581	215466	135794	172110
DNTTIP2	Deoxynucleotidyltransferase terminal-interacting protein 2 (Estrogen receptor-binding protein) (LPTS-interacting protein 2) (LPTS-RP2) (Terminal deoxynucleotidyltransferase-interacting factor 2) (TdIF2) (TdT-interacting factor 2)	210004	615155	767358	622689	688175	377841	403929	398030	281631
HSP90AA1	Heat shock protein HSP 90-alpha (EC 3.6.4.10) (Heat shock 86 kDa) (HSP 86) (HSP86) (Lipopolysaccharide-associated protein 2) (LAP-2) (LPS-associated protein 2) (Renal carcinoma antigen NY-REN-38)	1728860	1614660	1451030	1896810	1445930	1623500	1594620	1308560	1729070
KLF16	Krueppel-like factor 16 (Basic transcription element-binding protein 4) (BTE-binding protein 4) (Novel Sp1-like zinc finger transcription factor 2) (Transcription factor BTEB4) (Transcription factor NSLP2)					29624.8	80499.3	52529	36640.1
EMD	Emerin	244619	163345	187770	832098		170810	130688	118886	146679
HECTD1	E3 ubiquitin-protein ligase HECTD1 (EC 2.3.2.26) (E3 ligase for inhibin receptor) (EULIR) (HECT domain-containing protein 1)	175868	164170	205388	388569	240335	249506	262032	245556	317015
NDUFS2	NADH dehydrogenase [ubiquinone] iron-sulfur protein 2, mitochondrial (EC 7.1.1.2) (Complex I-49kD) (CI-49kD) (NADH-ubiquinone oxidoreductase 49 kDa subunit)	1065770	1038170	1144080	1354590	1193580	1257880	1329150	1388070	1249400
CNOT2	#N/A		37379.2	49511.7	38915.8		75062.3	69679	52961.2	41250.3
YTHDF1	YTH domain-containing family protein 1 (DF1) (Dermatomyositis associated with cancer putative autoantigen 1) (DACA-1)	59032.5	49561.1	39754.8		43930.3	33549.5	46762.2	30627.3	57820.7
YTHDF2	YTH domain-containing family protein 2 (DF2) (CLL-associated antigen KW-14) (High-glucose-regulated protein 8) (Renal carcinoma antigen NY-REN-2)	633859	461008	538932	306515	543799	529422	587626	536909	560466
RBM22	Pre-mRNA-splicing factor RBM22 (RNA-binding motif protein 22) (Zinc finger CCCH domain-containing protein 16)	1968660	2589710	2601160	2244870	2596580	2215650	2271810	2212780	2049990
DNAJB6	DnaJ homolog subfamily B member 6 (HHDJ1) (Heat shock protein J2) (HSJ-2) (MRJ) (MSJ-1)	452827	610215	508323	534320	607210	562029	563869	630846	705689
PCF11	Pre-mRNA cleavage complex 2 protein Pcf11 (Pre-mRNA cleavage complex II protein Pcf11)	291753	419123	458445	397411	384111	388753	420775	486238	378779
EXOSC9	Exosome complex component RRP45 (Autoantigen PM/Scl 1) (Exosome component 9) (P75 polymyositis-scleroderma overlap syndrome-associated autoantigen) (Polymyositis/scleroderma autoantigen 1) (Polymyositis/scleroderma autoantigen 75 kDa) (PM/Scl-75)	875197	947637	1105500	1255890	973826	1026860	1185650	912493	990850
DDX5	Probable ATP-dependent RNA helicase DDX5 (EC 3.6.4.13) (DEAD box protein 5) (RNA helicase p68)	42532200	42662400	40659800	33687000	46575600	42978800	40983500	42716800	37841300
	#N/A	123358	39402.7	163827	80189	52145.9	57360.9	53551.2	62782	36271
CWF19L1	CWF19-like protein 1 (C19L1)	368210	409116	403358	337896	380981	364764	407933	441597	410429
IDH3A	Isocitrate dehydrogenase [NAD] subunit alpha, mitochondrial (EC 1.1.1.41) (Isocitric dehydrogenase subunit alpha) (NAD(+)-specific ICDH subunit alpha)	588788	684888	544638	900577	497100	711707	879328	721119	1047150
AMMECR1L	AMMECR1-like protein	164810	168117	188678	151653	169021	160704	179921	164932	120505
KDM2B	Lysine-specific demethylase 2B (EC 1.14.11.27) (CXXC-type zinc finger protein 2) (F-box and leucine-rich repeat protein 10) (F-box protein FBL10) (F-box/LRR-repeat protein 10) (JmjC domain-containing histone demethylation protein 1B) (Jumonji domain-containing EMSY-interactor methyltransferase motif protein) (Protein JEMMA) (Protein-containing CXXC domain 2) ([Histone-H3]-lysine-36 demethylase 1B)	217257	699802	539508	473585	516673	321610	284938	269130	268580
BAZ1A	Bromodomain adjacent to zinc finger domain protein 1A (ATP-dependent chromatin-remodeling protein) (ATP-utilizing chromatin assembly and remodeling factor 1) (hACF1) (CHRAC subunit ACF1) (Williams syndrome transcription factor-related chromatin-remodeling factor 180) (WCRF180) (hWALp1)	907426	3099980	2955240	1757750	2098340	1493790	1616650	1251810	1371700
NCAPH	Condensin complex subunit 2 (Barren homolog protein 1) (Chromosome-associated protein H) (hCAP-H) (Non-SMC condensin I complex subunit H) (XCAP-H homolog)	357913	400290	412287	290913	440676	254033	351466	382671	491265
DDX17	Probable ATP-dependent RNA helicase DDX17 (EC 3.6.4.13) (DEAD box protein 17) (DEAD box protein p72) (DEAD box protein p82) (RNA-dependent helicase p72)	4915500	4752970	4449050	3958120	4826170	4682670	4423970	4245120	4460530
LEO1	RNA polymerase-associated protein LEO1 (Replicative senescence down-regulated leo1-like protein)	125878	129491	114175		69044.1	58696.6	84452.4	101023	90168.6
WDR12	Ribosome biogenesis protein WDR12 (WD repeat-containing protein 12)	3678190	4750650	3933690	3135540	4553770	4020200	3704260	3223680	3110120
TF	Serotransferrin (Transferrin) (Beta-1 metal-binding globulin) (Siderophilin)	4983140	3360520	2955830	5387960	3584350	3189490	3023350	2590980	3198450
CBLL1	E3 ubiquitin-protein ligase Hakai (EC 2.3.2.27) (Casitas B-lineage lymphoma-transforming sequence-like protein 1) (c-Cbl-like protein 1) (RING finger protein 188) (RING-type E3 ubiquitin transferase Hakai)	139132	152442	189337	100793	219463	157509	178329	150697	170749
LEMD3	Inner nuclear membrane protein Man1 (LEM domain-containing protein 3)	88403.5				165003	118287	132446	97017.8	148842
BUD31	Protein BUD31 homolog (Protein EDG-2) (Protein G10 homolog)		67988	46311		38005.4	62649		47648.5	39342.3
THOC6	THO complex subunit 6 homolog (Functional spliceosome-associated protein 35) (fSAP35) (WD repeat-containing protein 58)	296893	268234	276341	264359	334384	273856	295211	327446	390414
CSNK1G3	Casein kinase I isoform gamma-3 (CKI-gamma 3) (EC 2.7.11.1)	140163	123927	165087	122572	148428	172284	154625	198179	180172
PDCD4	Programmed cell death protein 4 (Neoplastic transformation inhibitor protein) (Nuclear antigen H731-like) (Protein 197/15a)	57531.8	83645.4	65183	40098.7	78694.5	112839	88735.1	70076.1	69647.1
MRPL13	Large ribosomal subunit protein uL13m (39S ribosomal protein L13, mitochondrial) (L13mt) (MRP-L13)	186726	178148	282656	187980	176650	216606	198424	200726	138301
DGKE	#N/A	28193.6	28213.4			28050.1		16053.8	39492.4	40775.9
TCEA1	Transcription elongation factor A protein 1 (Transcription elongation factor S-II protein 1) (Transcription elongation factor TFIIS.o)	115402	162118	112821	121787	79160.9	213383	224225	151347	94966.1
KRT16	Keratin, type I cytoskeletal 16 (Cytokeratin-16) (CK-16) (Keratin-16) (K16)	2661210	3485800	6265020	1147710000	4285180	5248670	9345490	8575630	37547700
CRYAB	Alpha-crystallin B chain (Alpha(B)-crystallin) (Heat shock protein beta-5) (HspB5) (Renal carcinoma antigen NY-REN-27) (Rosenthal fiber component)	86639.6	141943	163071	354092	98140.5	92865.9	133239	101850	135105
NOB1	RNA-binding protein NOB1 (EC 3.1.-.-) (Phosphorylation regulatory protein HP-10) (Protein ART-4)	361562	447364	442261	315195	411659	412679	418642	479354	436565
OGA	Protein O-GlcNAcase (OGA) (EC 3.2.1.169) (Beta-N-acetylglucosaminidase) (Beta-N-acetylhexosaminidase) (Beta-hexosaminidase) (Meningioma-expressed antigen 5) (N-acetyl-beta-D-glucosaminidase) (N-acetyl-beta-glucosaminidase) (Nuclear cytoplasmic O-GlcNAcase and acetyltransferase) (NCOAT)	66549	70408.2	68461.5	46443.4	71359.3	70512.9	97774.2	96526.4	75324.3
PSMD2	26S proteasome non-ATPase regulatory subunit 2 (26S proteasome regulatory subunit RPN1) (26S proteasome regulatory subunit S2) (26S proteasome subunit p97) (Protein 55.11) (Tumor necrosis factor type 1 receptor-associated protein 2)	752913	657489	691820	673262	663240	805280	835451	810349	764466
NSMCE3	Non-structural maintenance of chromosomes element 3 homolog (Non-SMC element 3 homolog) (Hepatocellular carcinoma-associated protein 4) (MAGE-G1 antigen) (Melanoma-associated antigen G1) (Necdin-like protein 2)		94268.7	98192.3		70519.6	245520	227229	262506	181702
TSG101	#N/A	25161.3	35025.3	17129	99396.2		38694
MUC5B	Mucin-5B (MUC-5B) (Cervical mucin) (High molecular weight salivary mucin MG1) (Mucin-5 subtype B, tracheobronchial) (Sublingual gland mucin)	1548620	1092000	939622	2044220	782542	1041430	1002060	868696	1009960
EIF3B	Eukaryotic translation initiation factor 3 subunit B (eIF3b) (Eukaryotic translation initiation factor 3 subunit 9) (Prt1 homolog) (hPrt1) (eIF-3-eta) (eIF3 p110) (eIF3 p116)	268846	279339	281624	371368	249290	324400	325220	289270	328862
SEC31A	Protein transport protein Sec31A (ABP125) (ABP130) (SEC31-like protein 1) (SEC31-related protein A) (Web1-like protein)	287715	301436	284324	295974	331001	308773	304743	383319	387467
TDG	G/T mismatch-specific thymine DNA glycosylase (EC 3.2.2.29) (Thymine-DNA glycosylase) (hTDG)		94520.3	126349	78854.3	68623.5	114123	110410	101838	80899.5
NBAS	NBAS subunit of NRZ tethering complex (Neuroblastoma-amplified gene protein) (Neuroblastoma-amplified sequence)	103209	142602	140707	104441	150133	142950	187942	159684	170794
ILF2	Interleukin enhancer-binding factor 2 (Nuclear factor of activated T-cells 45 kDa)	732509	910248	894647	744770	767407	916452	883728	727186	740967
EVI5L	#N/A		16080.9			21662.1	24784.4		28039.7	35008.6
DNAJC9	#N/A	36985.8	37390.5	28975.2	51109.3			35770.9
GTF2H4	General transcription factor IIH subunit 4 (Basic transcription factor 2 52 kDa subunit) (BTF2 p52) (General transcription factor IIH polypeptide 4) (TFIIH basal transcription factor complex p52 subunit)	72247	106621	115272	124515	119916	110643	105594	118037	86181.2
ACTR8	Actin-related protein 8 (hArp8) (INO80 complex subunit N)	243107	273975	248376	188400	221439	275972	250814	247072	275770
FAM98A	Protein FAM98A	648755	626346	580171	511700	680190	537156	601062	501166	486560
SF3A1	Splicing factor 3A subunit 1 (SF3a120) (Spliceosome-associated protein 114) (SAP 114)	962593	1047740	824833	1029370	764420	944279	1016670	872987	637104
RBL1	Retinoblastoma-like protein 1 (107 kDa retinoblastoma-associated protein) (p107) (pRb1)	85142.6	89955.8	79162.9	48156.4	95599.9	100120	100546	130495	118974
DNAJA3	#N/A		38837.5
THBS1	Thrombospondin-1 (Glycoprotein G)	360440	249028	200358	340487	194889	255113	245418	221298	296333
THNSL1	#N/A				240607
FN1	Fibronectin (FN) (Cold-insoluble globulin) (CIG) [Cleaved into: Anastellin; Ugl-Y1; Ugl-Y2; Ugl-Y3]	2902550	1985150	1750880	2887320	1674690	1959700	1882420	1601440	1907360
RAB25	#N/A				97792.4			27945.4	20512.6
MPST	#N/A				129485
STAT2	Signal transducer and activator of transcription 2 (p113)	82346.7	95832.8	26629.8	65824.5	30708.1	33768.4		126723	149410
HSPB1	Heat shock protein beta-1 (HspB1) (28 kDa heat shock protein) (Estrogen-regulated 24 kDa protein) (Heat shock 27 kDa protein) (HSP 27) (Stress-responsive protein 27) (SRP27)	1262760	904812	868414	6187110	564781	906400	744257	683972	1002920
DRG2	Developmentally-regulated GTP-binding protein 2 (DRG-2) (Translation factor GTPase DRG2) (TRAFAC GTPase DRG2) (EC 3.6.5.-)	309649	289399	307300	260223	296052	350715	314461	398036	379199
RPL8	Large ribosomal subunit protein uL2 (60S ribosomal protein L8)	6763840	9445980	9612780	7490520	8877850	10660200	10354200	11856600	9323640
MICAL1	[F-actin]-monooxygenase MICAL1 (EC 1.14.13.225) (EC 1.6.3.1) (Molecule interacting with CasL protein 1) (MICAL-1) (NEDD9-interacting protein with calponin homology and LIM domains)	318008	308978	347175	315214	397536	370475	491693	496676	457124
FGA	Fibrinogen alpha chain [Cleaved into: Fibrinopeptide A; Fibrinogen alpha chain]	5711230	4214760	3580120	6436060	3445080	3972760	3873310	3390990	3992000
BLM	RecQ-like DNA helicase BLM (EC 3.6.4.12) (Bloom syndrome protein) (DNA helicase, RecQ-like type 2) (RecQ2) (RecQ protein-like 3)	182035	242886	189119	170617	167209	226999	208430	266036	248704
SAE1	SUMO-activating enzyme subunit 1 (Ubiquitin-like 1-activating enzyme E1A) [Cleaved into: SUMO-activating enzyme subunit 1, N-terminally processed]	162068	131669	170601	127772	193243	185501	195161	181670	200517
CNNM3	#N/A	158391	108391	91760.2	153542	52994.7	114540	91650.7	96381.4	85699.4
PSMA1	Proteasome subunit alpha type-1 (30 kDa prosomal protein) (PROS-30) (Macropain subunit C2) (Multicatalytic endopeptidase complex subunit C2) (Proteasome component C2) (Proteasome nu chain)	1023760	873201	764417	6680990	740391	843860	885263	962531	1206570
ZNF654	#N/A		27546.4	37793.8	28060.2	28911.2	40148.9	33436.7	47473.6	29325.7
PI4K2A	Phosphatidylinositol 4-kinase type 2-alpha (EC 2.7.1.67) (Phosphatidylinositol 4-kinase type II-alpha)			19157.5	116490			24411.2	18726.4
SCAMP3	Secretory carrier-associated membrane protein 3 (Secretory carrier membrane protein 3)	124727	120879	32393.3	126845	92900.1	128446	111683	137382	85930.6
RRM1	Ribonucleoside-diphosphate reductase large subunit (EC 1.17.4.1) (Ribonucleoside-diphosphate reductase subunit M1) (Ribonucleotide reductase large subunit)	245648	279998	299485	354618	290309	308509	336642	366579	362504
RAPGEF2	#N/A		49063.5	53338.6		73911.6
PRKD2	Serine/threonine-protein kinase D2 (EC 2.7.11.13) (nPKC-D2)	57792.8	182997	194450	135770	122201	287333	292161	282650	250845
SEPTIN10	Septin-10	180373	223315	192287	166208	182193	211976	228415	234882	212469
CAPG	Macrophage-capping protein (Actin regulatory protein CAP-G)	27327.5	43014.2	50199.4	164379	34315.2	62083.1	66046.6	47581.6	33204
TNRC6A	Trinucleotide repeat-containing gene 6A protein (CAG repeat protein 26) (EMSY interactor protein) (GW182 autoantigen) (Protein GW1) (Glycine-tryptophan protein of 182 kDa)	3385410	2662180	2797030	1809650	2766380	2785430	3283010	2935300	2878010
ANAPC4	Anaphase-promoting complex subunit 4 (APC4) (Cyclosome subunit 4)	197982	286524	414347	279151	264625	428154	262360	349397	395732
PRDM10	PR domain zinc finger protein 10 (EC 2.1.1.-) (PR domain-containing protein 10) (Tristanin)	131434	232908	174739	150752	194599	173098	120132	127803	110073
ZNF691	Zinc finger protein 691	189972	281589	232028		274463	200475	213382	219239	250445
SF3A3	Splicing factor 3A subunit 3 (SF3a60) (Spliceosome-associated protein 61) (SAP 61)	206534	156419	191218	312981	179756	205705	155993	146241	159814
TPM3	Tropomyosin alpha-3 chain (Gamma-tropomyosin) (Tropomyosin-3) (Tropomyosin-5) (hTM5)	946560	891949	788247	5407330	690848	916225	974196	823296	1388800
MRPS16	#N/A	190991	152658	134401		100295	135846	203434	199106	157788
SEC11A	Signal peptidase complex catalytic subunit SEC11A (EC 3.4.21.89) (Endopeptidase SP18) (Microsomal signal peptidase 18 kDa subunit) (SPase 18 kDa subunit) (SEC11 homolog A) (SEC11-like protein 1) (SPC18)	798943	635003	968872	1547700	666390	827307	1047100	844394	957318
KCTD1	BTB/POZ domain-containing protein KCTD1 (Potassium channel tetramerization domain-containing protein 1)		413970	351746	414867	521453	355731	350272	258355	268899
	Potassium channel tetramerization domain containing 1		106334	114597	52097.5	115891	72928.6	74863.4	58766.6	46609.4
NVL	Nuclear valosin-containing protein-like (NVLp) (Nuclear VCP-like protein)	182704	262922	234250	151654	169590	256621	277323	239510	257424
SUCLG2	Succinate--CoA ligase [GDP-forming] subunit beta, mitochondrial (EC 6.2.1.4) (GTP-specific succinyl-CoA synthetase subunit beta) (G-SCS) (GTPSCS) (Succinyl-CoA synthetase beta-G chain) (SCS-betaG)	134897	228422	145243	173950	192199	191603	282758	315553	207421
MRPL48	Large ribosomal subunit protein mL48 (39S ribosomal protein L48, mitochondrial) (L48mt) (MRP-L48)		43332	84264.4	61213.7	65041.8	60413.9	34711.3	29385.6	70369.2
PYGB	Glycogen phosphorylase, brain form (EC 2.4.1.1)	576515	544258	569553	1605310	570152	584487	637612	542702	812865
EML1	#N/A				65848.5
AKAP8	#N/A	525499	328655	352768	336381	364793	361448	351848	258678	227581
PPIE	#N/A	79337.6	46688.9	60874.8	61786.1	69961.4	50013.5	50895.6	55448.9	89885.7
MORF4L1	Mortality factor 4-like protein 1 (MORF-related gene 15 protein) (Protein MSL3-1) (Transcription factor-like protein MRG15)	285218	344655	313726	261910	281507	274093	270993	262189	246393
CCDC47	PAT complex subunit CCDC47 (Calumin) (Coiled-coil domain-containing protein 47)		54800.7	45067	104291	35402.7	34093.3	45514.9	87674.5	62052.6
SEC63	Translocation protein SEC63 homolog	129950	131616	127531	172719	110371	121775	136432	129195	123188
WDR26	WD repeat-containing protein 26 (CUL4- and DDB1-associated WDR protein 2) (Myocardial ischemic preconditioning up-regulated protein 2)	194009	205349	201641	191836	233579	243615	239692	247934	242732
IMP3	U3 small nucleolar ribonucleoprotein protein IMP3 (U3 snoRNP protein IMP3) (BRMS2)	772013	581361	777798	599798	606464	564496	615246	485887	496878
GOT2	Aspartate aminotransferase, mitochondrial (mAspAT) (EC 2.6.1.1) (EC 2.6.1.7) (Fatty acid-binding protein) (FABP-1) (Glutamate oxaloacetate transaminase 2) (Kynurenine aminotransferase 4) (Kynurenine aminotransferase IV) (Kynurenine--oxoglutarate transaminase 4) (Kynurenine--oxoglutarate transaminase IV) (Plasma membrane-associated fatty acid-binding protein) (FABPpm) (Transaminase A)	232158	167366	171929	553102	136818	146884	180451	143027	138470
ZNF687	Zinc finger protein 687		1221620	1212920	1105150	1131250	731694	583083	654700	699934
LAP3	Cytosol aminopeptidase (EC 3.4.11.1) (Cysteinylglycine-S-conjugate dipeptidase) (EC 3.4.13.23) (Leucine aminopeptidase 3) (LAP-3) (Leucyl aminopeptidase) (Peptidase S) (Proline aminopeptidase) (EC 3.4.11.5) (Prolyl aminopeptidase)	143557	83510.8	71967	113832	51191.4	61712.2	99579.6	104290	106085
GLIPR2	Golgi-associated plant pathogenesis-related protein 1 (GAPR-1) (Golgi-associated PR-1 protein) (Glioma pathogenesis-related protein 2) (GliPR 2)		61227.1	82229.9		72498.3	73859.2	95481.3	101091	122238
CLUH	Clustered mitochondria protein homolog	220865	282206	283498	305661	272425	288796	291089	261314	341172
CDC7	#N/A	48454.3	42465.5	54300.8		51218.1		63065.6	52488.8	71397.3
SLC35B2	Adenosine 3'-phospho 5'-phosphosulfate transporter 1 (PAPS transporter 1) (Putative MAPK-activating protein PM15) (Putative NF-kappa-B-activating protein 48) (Solute carrier family 35 member B2)	143460	214818	100400	177883	194826	245883	168440	242233	220855
CEP295	#N/A				577304			33515.9
NUP153	Nuclear pore complex protein Nup153 (153 kDa nucleoporin) (Nucleoporin Nup153)	377012	775893	755716	536817	752801	628718	541298	527270	599837
RAD17	Cell cycle checkpoint protein RAD17 (hRad17) (RF-C/activator 1 homolog)	186778	181177	139244	114056	161555	187808	177529	205479	196728
AP2M1	AP-2 complex subunit mu (AP-2 mu chain) (Adaptin-mu2) (Adaptor protein complex AP-2 subunit mu) (Adaptor-related protein complex 2 subunit mu) (Clathrin assembly protein complex 2 mu medium chain) (Clathrin coat assembly protein AP50) (Clathrin coat-associated protein AP50) (HA2 50 kDa subunit) (Plasma membrane adaptor AP-2 50 kDa protein)	1427510	1626800	1728000	1782240	1691050	1896510	1995430	2100730	1980930
SMARCB1	SWI/SNF-related matrix-associated actin-dependent regulator of chromatin subfamily B member 1 (BRG1-associated factor 47) (BAF47) (Integrase interactor 1 protein) (SNF5 homolog) (hSNF5)	592224	744592	800970	638137	769567	603699	682831	732284	703781
RAD23B	#N/A	36980.8	59687.1	14597.1		43002.4	63725.4	80338.7	41314.8	45484.7
LYPLA1	Acyl-protein thioesterase 1 (APT-1) (hAPT1) (EC 3.1.2.-) (Lysophospholipase 1) (Lysophospholipase I) (LPL-I) (LysoPLA I) (Palmitoyl-protein hydrolase) (EC 3.1.2.22)	166885	146806	187263	4156940	156781	104231	169993	123391	337685
SACM1L	Phosphatidylinositol-3-phosphatase SAC1 (EC 3.1.3.64) (Phosphatidylinositol-4-phosphate phosphatase) (Suppressor of actin mutations 1-like protein)	421271	437535	480137	483993	515253	560657	592609	639033	519911
TNPO3	#N/A		121181	102337		108034	113646	103226	98057.8	123772
KDM6A	Lysine-specific demethylase 6A (EC 1.14.11.68) (Histone demethylase UTX) (Ubiquitously-transcribed TPR protein on the X chromosome) (Ubiquitously-transcribed X chromosome tetratricopeptide repeat protein) ([histone H3]-trimethyl-L-lysine(27) demethylase 6A)	191074	255487	292808	187037	203914	197561	213562	222404	206396
ENDOG	#N/A	85456.7	72718.4			52791.1	69621.7	88168.8	67834.5	53262.3
NET1	#N/A		25812.3	22668.4		22296.2	15620.7	10932.8	30026.8	33420.8
MTHFD1L	Monofunctional C1-tetrahydrofolate synthase, mitochondrial (EC 6.3.4.3) (Formyltetrahydrofolate synthetase)	418914	516447	624342	385352	526793	582418	638332	757445	705428
ARPC2	Actin-related protein 2/3 complex subunit 2 (Arp2/3 complex 34 kDa subunit) (p34-ARC)	2457920	2358630	3094710	2629410	2642200	3239570	3680770	3768600	3392650
WAPL	Wings apart-like protein homolog (Friend of EBNA2 protein) (WAPL cohesin release factor)	193544	245221	241404	198513	324484	236523	262402	247931	309688
MARK2	Serine/threonine-protein kinase MARK2 (EC 2.7.11.1) (EC 2.7.11.26) (ELKL motif kinase 1) (EMK-1) (MAP/microtubule affinity-regulating kinase 2) (PAR1 homolog) (PAR1 homolog b) (Par-1b) (Par1b)	135777	164385	156631	147599	152950	172084	182843	209243	205126
KPNA2	Importin subunit alpha-1 (Karyopherin subunit alpha-2) (RAG cohort protein 1) (SRP1-alpha)	170930	110218	115004	145197	99675	123433	110373	116324	120893
CHTOP	Chromatin target of PRMT1 protein (Friend of PRMT1 protein) (Small arginine- and glycine-rich protein) (SRAG)	60798.8	63392.3	73166.4	20996.6	79885.5	81017.3	60382.5	76735	80135.6
COPA	Coatomer subunit alpha (Alpha-coat protein) (Alpha-COP) (HEP-COP) (HEPCOP) [Cleaved into: Xenin (Xenopsin-related peptide); Proxenin]	1771800	2042920	2186720	1960100	2071060	2004290	2093550	2125400	2100580
EXOC2	Exocyst complex component 2 (Exocyst complex component Sec5)	108093	184853	145498	172285	179214	218515	199920	318081	252605
PRDM2	PR domain zinc finger protein 2 (EC 2.1.1.355) (GATA-3-binding protein G3B) (Lysine N-methyltransferase 8) (MTB-ZF) (MTE-binding protein) (PR domain-containing protein 2) (Retinoblastoma protein-interacting zinc finger protein) (Zinc finger protein RIZ)		88895.2	76905.7		113041	48540.1	46909.8	52345.2
ZNF644	Zinc finger protein 644 (Zinc finger motif enhancer-binding protein 2) (Zep-2)		307739	289498	256239	259565	175054	163871	141443	150150
USO1	General vesicular transport factor p115 (Protein USO1 homolog) (Transcytosis-associated protein) (TAP) (Vesicle-docking protein)	34317.3	69424.7	57328.5		37882.5	40835.3	60522	57023	41079.2
ARPC1B	Actin-related protein 2/3 complex subunit 1B (Arp2/3 complex 41 kDa subunit) (p41-ARC)	3273390	4082910	4751210	3759380	4595060	4373050	4943750	5433850	5261310
CLU	Clusterin (Aging-associated gene 4 protein) (Apolipoprotein J) (Apo-J) (Complement cytolysis inhibitor) (CLI) (Complement-associated protein SP-40,40) (Ku70-binding protein 1) (NA1/NA2) (Sulfated glycoprotein 2) (SGP-2) (Testosterone-repressed prostate message 2) (TRPM-2) [Cleaved into: Clusterin beta chain (ApoJalpha) (Complement cytolysis inhibitor a chain) (SP-40,40 beta-chain); Clusterin alph…	425521	316508	272076	461606	357219	279800	261470	197017	212969
IGKV1-5	Immunoglobulin kappa variable 1-5 (Ig kappa chain V-I region CAR) (Ig kappa chain V-I region EU) (Ig kappa chain V-I region HK102) (Ig kappa chain V-I region Kue)	3505910	922503	789918	2318470	793543	891270	833385	761346	1049980
EIF4G2	Eukaryotic translation initiation factor 4 gamma 2 (eIF-4-gamma 2) (eIF-4G 2) (eIF4G 2) (Death-associated protein 5) (DAP-5) (p97)	91929.8	152911	130242	124302	160699	177964	179675	166260	162904
L3MBTL2	Lethal(3)malignant brain tumor-like protein 2 (H-l(3)mbt-like protein 2) (L(3)mbt-like protein 2)	185156	1211160	1490790	1158240	1001790	798371	744505	512805	692150
ARGLU1	Arginine and glutamate-rich protein 1	1339210	884550	1053900	531286	902873	1030690	940200	792658	713945
PRKCI	Protein kinase C iota type (EC 2.7.11.13) (Atypical protein kinase C-lambda/iota) (PRKC-lambda/iota) (aPKC-lambda/iota) (nPKC-iota)	67495.5	85585	62175.7	130591	61302.1	98010.7	65759.7	74122.9	120998
SLC35B1	#N/A			13163.5	47606.4	30152.4
ILKAP	Integrin-linked kinase-associated serine/threonine phosphatase 2C (ILKAP) (EC 3.1.3.16)	532511	528824	489493	576026	620296	563660	674239	711504	726783
TPR	Nucleoprotein TPR (Megator) (NPC-associated intranuclear protein) (Translocated promoter region protein)	117114	237772	258739	202365	189892	169036	135272	186447	189468
RAP2B	#N/A			18196.9	34938.5				37161.1
PLRG1	Pleiotropic regulator 1	2525750	2817660	2667330	2577990	2828220	2511470	2399220	2277630	2183270
CKAP4	Cytoskeleton-associated protein 4 (63-kDa cytoskeleton-linking membrane protein) (Climp-63) (p63)	137478	93781.1	130069	409869	72828.4	96915.4	90070.6	91298.2	108278
NFATC1	Nuclear factor of activated T-cells, cytoplasmic 1 (NF-ATc1) (NFATc1) (NFAT transcription complex cytosolic component) (NF-ATc) (NFATc)	67730.4	184369	286313	163683	236208	292707	383863	209155	207486
DTD1	D-aminoacyl-tRNA deacylase 1 (DTD) (EC 3.1.1.96) (DNA-unwinding element-binding protein B) (DUE-B) (Gly-tRNA(Ala) deacylase) (Histidyl-tRNA synthase-related)	73476.7	75746.4	66609.9	696312	71967	70149.4	47072.8	56244.6	52188.2
DDB2	#N/A	148954	160979	171416		148321	136775	127570	171833	163008
COX4I1	Cytochrome c oxidase subunit 4 isoform 1, mitochondrial (Cytochrome c oxidase polypeptide IV) (Cytochrome c oxidase subunit IV isoform 1) (COX IV-1)	223570	145391	138525	304715	80771.2	135528	115321	111492	125645
RDH14	Retinol dehydrogenase 14 (EC 1.1.1.300) (Alcohol dehydrogenase PAN2) (Short chain dehydrogenase/reductase family 7C member 4)	75688.8	134844	123018	205086	139472	174580	144998	154283	153494
DECR1	2,4-dienoyl-CoA reductase [(3E)-enoyl-CoA-producing], mitochondrial (EC 1.3.1.124) (2,4-dienoyl-CoA reductase [NADPH]) (4-enoyl-CoA reductase [NADPH]) (Short chain dehydrogenase/reductase family 18C member 1)	181605	164727	149306	323542	131643	174252	231861	153133	156533
DOCK11	Dedicator of cytokinesis protein 11 (Activated Cdc42-associated guanine nucleotide exchange factor) (ACG) (Zizimin-2)	138585	190512	208060	180171	217523	215401	211270	283938	287066
PSMB5	Proteasome subunit beta type-5 (EC 3.4.25.1) (Macropain epsilon chain) (Multicatalytic endopeptidase complex epsilon chain) (Proteasome chain 6) (Proteasome epsilon chain) (Proteasome subunit MB1) (Proteasome subunit X)	263992	233917	200489	2270210	173979	196350	237600	210327	266403
AFG3L2	AFG3-like protein 2 (EC 3.4.24.-) (Paraplegin-like protein)	167105	116920	142708	187217	79643.5	161031	132080	120200	93088.9
EEF1D	Elongation factor 1-delta (EF-1-delta) (Antigen NY-CO-4)	892887	673809	595854	804072	523468	660986	578002	575950	719502
STK4	Serine/threonine-protein kinase 4 (EC 2.7.11.1) (Mammalian STE20-like protein kinase 1) (MST-1) (STE20-like kinase MST1) (Serine/threonine-protein kinase Krs-2) [Cleaved into: Serine/threonine-protein kinase 4 37kDa subunit (MST1/N); Serine/threonine-protein kinase 4 18kDa subunit (MST1/C)]	127051	205599	174411		154843	302438	261878	295928	246906
PRDX2	Peroxiredoxin-2 (EC 1.11.1.24) (Natural killer cell-enhancing factor B) (NKEF-B) (PRP) (Thiol-specific antioxidant protein) (TSA) (Thioredoxin peroxidase 1) (Thioredoxin-dependent peroxide reductase 1) (Thioredoxin-dependent peroxiredoxin 2)	886918	696190	559734	12242500	347849	625940	662182	543101	1098490
DBR1	Lariat debranching enzyme (EC 3.1.4.-)	118679	102350	134026	122317	95261.8	134369	134732	124264	104720
EVC2	#N/A	41747	63162.4	73174.3	30220.2	85344.1	91129.8	112814	76585.7	61731.2
IDH2	Isocitrate dehydrogenase [NADP], mitochondrial (IDH) (EC 1.1.1.42) (ICD-M) (IDP) (NADP(+)-specific ICDH) (Oxalosuccinate decarboxylase)	633992	565275	629653	920439	636785	651758	705417	883916	936092
IDH1	Isocitrate dehydrogenase [NADP] cytoplasmic (IDH) (IDH1) (EC 1.1.1.42) (Cytosolic NADP-isocitrate dehydrogenase) (IDPc) (NADP(+)-specific ICDH) (Oxalosuccinate decarboxylase)	68277.8	38551.7	63966.9	765455	66931.5	70184.1	83387.8	71704.3	93829.4
PNISR	#N/A	114713	69429.9	69603.1	28487.6	77910.5		101235	84081.2	31318
TUT4	Terminal uridylyltransferase 4 (TUTase 4) (EC 2.7.7.52) (Zinc finger CCHC domain-containing protein 11)	86043.3	62754.6	67457.9	39444.1	68448.8	79553.7	84129.4	86710.3	97617.7
OSBP	Oxysterol-binding protein 1	152980	126501	133830	241316	114674	101775	171593	153815	156698
HNRNPH3	Heterogeneous nuclear ribonucleoprotein H3 (hnRNP H3) (Heterogeneous nuclear ribonucleoprotein 2H9) (hnRNP 2H9)	4908270	4696990	4018410	2735380	3725880	3275660	3300520	3136340	3286140
HNRNPH2	Heterogeneous nuclear ribonucleoprotein H2 (hnRNP H2) (FTP-3) (Heterogeneous nuclear ribonucleoprotein H') (hnRNP H') [Cleaved into: Heterogeneous nuclear ribonucleoprotein H2, N-terminally processed]	882010	923053	822880	631887	969264	767160	619540	566826	861331
HNRNPH1	Heterogeneous nuclear ribonucleoprotein H (hnRNP H) [Cleaved into: Heterogeneous nuclear ribonucleoprotein H, N-terminally processed]	8338800	8251850	7596440	6912350	7869790	6918720	7020290	7348260	7581270
MRPL4	Large ribosomal subunit protein uL4m (39S ribosomal protein L4, mitochondrial) (L4mt) (MRP-L4)	220863	226844	309847	228326	300270	258089	209105	265775	144601
SUPV3L1	ATP-dependent RNA helicase SUPV3L1, mitochondrial (EC 3.6.4.13) (Suppressor of var1 3-like protein 1) (SUV3-like protein 1)	2295530	2664160	3440270	3359220	3458510	3409110	4489820	3420180	3746560
RPS6	Small ribosomal subunit protein eS6 (40S ribosomal protein S6) (Phosphoprotein NP33)	4799780	5891330	5818580	4651290	4704820	6463060	6849000	7029580	5974220
TRIM14	#N/A		97577.6	106646		111124	69139.7	92015.4	110855	149048
KRT6B	Keratin, type II cytoskeletal 6B (Cytokeratin-6B) (CK-6B) (Keratin-6B) (K6B) (Type-II keratin Kb10)	5354010	5261360	7001700	1474640000	8986390	7234500	11607300	9938900	57286000
PLEKHF1	#N/A	119073	130622	83771.5		120887	195559	129296	137729	154634
MKLN1	#N/A	129806	29354	55900.9		51125.7	53660.9	46556.2	45321.8	45674.4
GTF2H2;GTF2H2C	General transcription factor IIH subunit 2 (Basic transcription factor 2 44 kDa subunit) (BTF2 p44) (General transcription factor IIH polypeptide 2) (TFIIH basal transcription factor complex p44 subunit)	403281	436888	452304	502338	508052	468465	328601	524424	508862
RAB7A	Ras-related protein Rab-7a (EC 3.6.5.2)	884089	867745	845560	2912780	843650	996932	980759	874610	820170
LRRC59	Leucine-rich repeat-containing protein 59 (Ribosome-binding protein p34) (p34) [Cleaved into: Leucine-rich repeat-containing protein 59, N-terminally processed]	462627	480099	499089	464349	437387	521215	580321	521766	518741
CST1	Cystatin-SN (Cystain-SA-I) (Cystatin-1) (Salivary cystatin-SA-1)	37827.5	64663.5	49674.6	203374	41479.3	32450.9	43668.5	55926.2	81360.9
CDKN2AIP	CDKN2A-interacting protein (Collaborator of ARF)		29723.4	27862.3			11411.2	37015.8	21335.8
DGCR8	Microprocessor complex subunit DGCR8 (DiGeorge syndrome critical region 8)		43198.2			73236.1		107539	127093	63427.7
PPP2R5A	#N/A		31260.4	42602.7			80816.7	39925.2	51335.8	79577
FYTTD1	UAP56-interacting factor (Forty-two-three domain-containing protein 1) (Protein 40-2-3)	438555	643507	691521	456172	638014	623006	483823	582506	477664
ACOT7	Cytosolic acyl coenzyme A thioester hydrolase (EC 3.1.2.2) (Acyl-CoA thioesterase 7) (Brain acyl-CoA hydrolase) (BACH) (hBACH) (CTE-IIa) (CTE-II) (Long chain acyl-CoA thioester hydrolase)	270092	161964	147488	368695	176717	172001	181646	155560	207045
ISG20	Interferon-stimulated gene 20 kDa protein (EC 3.1.13.1) (Estrogen-regulated transcript 45 protein) (Promyelocytic leukemia nuclear body-associated protein ISG20)	104088	158023	131956	22780.4	109121	160750		125499	88933
SLC35E1	#N/A		82027.2	98900.2	117799	63800.2	106341	90000.6	93876.3	79831.8
ADNP	Activity-dependent neuroprotector homeobox protein (Activity-dependent neuroprotective protein)	259568	409035	424082	337527	463730	397282	358404	349098	390454
CSDE1	Cold shock domain-containing protein E1 (N-ras upstream gene protein) (Protein UNR)	323182	352692	354189	350754	380106	403597	381323	380540	410595
LYZ	Lysozyme C (EC 3.2.1.17) (1,4-beta-N-acetylmuramidase C)	8428620	5864650	6254420	29616300	4360580	6096800	5722550	4975180	6084630
HIRA	Protein HIRA (TUP1-like enhancer of split protein 1)	124533	231006	253648	207280	235757	259105	232950	225352	281962
TOP1MT	#N/A	77110.3		111995			64154.8
NDUFA3	#N/A	26598.7	23102.6	57291.6		29511.7	17384.5		39082.6
EIF4A1	Eukaryotic initiation factor 4A-I (eIF-4A-I) (eIF4A-I) (EC 3.6.4.13) (ATP-dependent RNA helicase eIF4A-1)	2629530	2616620	2685140	3168000	2892640	2969140	3088490	3839990	3274520
TOR1AIP1	#N/A					19734.8			28644.5	34728
ZDHHC13	Palmitoyltransferase ZDHHC13 (EC 2.3.1.225) (Huntingtin-interacting protein 14-related protein) (HIP14-related protein) (Huntingtin-interacting protein HIP3RP) (Putative MAPK-activating protein PM03) (Putative NF-kappa-B-activating protein 209) (Zinc finger DHHC domain-containing protein 13) (DHHC-13)	112620	187826	232790	130430	121006	194647	261385	241923	253751
LUC7L3	Luc7-like protein 3 (Cisplatin resistance-associated-overexpressed protein) (Luc7A) (Okadaic acid-inducible phosphoprotein OA48-18) (cAMP regulatory element-associated protein 1) (CRE-associated protein 1) (CREAP-1)	205457	198599	181083	326070	172830	233865	223599	214003	308180
GLCCI1	Glucocorticoid induced 1	949142	1195840	597961	675481	1596670	264544	398820	487089	395097
YWHAG	14-3-3 protein gamma (Protein kinase C inhibitor protein 1) (KCIP-1) [Cleaved into: 14-3-3 protein gamma, N-terminally processed]	407395	352386	328241	551487	286839	330731	408407	315477	398139
APOH	Beta-2-glycoprotein 1 (APC inhibitor) (Activated protein C-binding protein) (Anticardiolipin cofactor) (Apolipoprotein H) (Apo-H) (Beta-2-glycoprotein I) (B2GPI) (Beta(2)GPI)	1059550	608857	573856	1049580	589282	608501	572406	519579	570860
PPRC1	#N/A	39070.8				31144.5	71614.3	40430.7	53179.2
BCKDHA	2-oxoisovalerate dehydrogenase subunit alpha, mitochondrial (EC 1.2.4.4) (Branched-chain alpha-keto acid dehydrogenase E1 component alpha chain) (BCKDE1A) (BCKDH E1-alpha)	151725	75689.2	131264		109350	125254	166705	165400	133158
ABHD14B	#N/A	22713.6			111527
MTMR14	Myotubularin-related protein 14 (EC 3.1.3.-) (HCV NS5A-transactivated protein 4 splice variant A-binding protein 1) (NS5ATP4ABP1) (hJumpy)	81758.6	111356	84083.5	98056.8	142156	158281	107270	107775	146647
PANK4	4'-phosphopantetheine phosphatase (EC 3.1.3.-) (Inactive pantothenic acid kinase 4) (hPanK4)	76870.3	116567	111629	79890.5	118133	117815	102811	151796	138962
TBPL1	TATA box-binding protein-like 1 (TBP-like 1) (21 kDa TBP-like protein) (Second TBP of unique DNA protein) (STUD) (TATA box-binding protein-related factor 2) (TBP-related factor 2) (TBP-like factor) (TBP-related protein)	44545.8		30214	61308	69442.7			29067.8	52819.4
VPS4A	Vacuolar protein sorting-associated protein 4A (EC 3.6.4.6) (Protein SKD2) (VPS4-1) (hVPS4)	134499	100885	107649	70399.2	95366.3	145338	155978	127242	139367
PSMD14	26S proteasome non-ATPase regulatory subunit 14 (EC 3.4.19.-) (26S proteasome regulatory subunit RPN11) (26S proteasome-associated PAD1 homolog 1)	484471	382230	349072	482649	291781	364314	440087	443132	500571
WDR6	tRNA (34-2'-O)-methyltransferase regulator WDR6 (WD repeat-containing protein 6)	270352	352335	323355	306587	389580	380449	408670	386722	454593
A2ML1	Alpha-2-macroglobulin-like protein 1 (C3 and PZP-like alpha-2-macroglobulin domain-containing protein 9)	1399210	1002620	822977	7510080	726470	854684	897893	898494	1090400
RAB5A	Ras-related protein Rab-5A (EC 3.6.5.2)	251605	269474	277218	331897	294380	241084	247763	307909	277330
PSIP1	PC4 and SFRS1-interacting protein (CLL-associated antigen KW-7) (Dense fine speckles 70 kDa protein) (DFS 70) (Lens epithelium-derived growth factor) (Transcriptional coactivator p75/p52)	140368	182830	209800		203981	235148	189505	245934	222747
NIT2	Omega-amidase NIT2 (EC 3.5.1.3) (Nitrilase homolog 2)	67140.2	38530.5	80271.2	520494	24234.3	16749.7	50379		40348.6
NUP210	Nuclear pore membrane glycoprotein 210 (Nuclear pore protein gp210) (Nuclear envelope pore membrane protein POM 210) (POM210) (Nucleoporin Nup210) (Pore membrane protein of 210 kDa)	719297	818238	974114	589615	743447	925814	855567	1021400	1086990
ATP5F1A	ATP synthase subunit alpha, mitochondrial (ATP synthase F1 subunit alpha)	5263290	5647250	7873390	7434400	5548570	4550170	5351130	6560930	4768680
PAPOLG	Poly(A) polymerase gamma (PAP-gamma) (EC 2.7.7.19) (Neo-poly(A) polymerase) (Neo-PAP) (Polynucleotide adenylyltransferase gamma) (SRP RNA 3'-adenylating enzyme) (Signal recognition particle RNA-adenylating enzyme) (SRP RNA-adenylating enzyme)	111342	106211	105880	54897.7	107319	131848	113900	113366	116693
RAB5C	Ras-related protein Rab-5C (EC 3.6.5.2) (L1880) (RAB5L)	3790370	3546450	3829350	3425190	3080890	3200670	2999710	3976540	3761920
KAT6A	Histone acetyltransferase KAT6A (EC 2.3.1.48) (MOZ, YBF2/SAS3, SAS2 and TIP60 protein 3) (MYST-3) (Monocytic leukemia zinc finger protein) (Runt-related transcription factor-binding protein 2) (Zinc finger protein 220)	182808	417244	386672	270048	358983	302491	272345	287071	273175
PMPCB	Mitochondrial-processing peptidase subunit beta (EC 3.4.24.64) (Beta-MPP) (P-52)	170456	259794	272027	284004	146549	263280	311564	366528	373629
	#N/A				100052		20034.2
TKT	Transketolase (TK) (EC 2.2.1.1)	1416700	1360490	1383070	5017400	1165860	1368290	1298230	1012150	1128630
AACS	Acetoacetyl-CoA synthetase (EC 6.2.1.16) (Acyl-CoA synthetase family member 1) (Protein sur-5 homolog)	149225	240288	234106	218078	183523	243520	269497	286024	250455
ATM	Serine-protein kinase ATM (EC 2.7.11.1) (Ataxia telangiectasia mutated) (A-T mutated)	547840	604866	562626	515549	586512	554684	587963	753957	815949
PTGFRN	Prostaglandin F2 receptor negative regulator (CD9 partner 1) (CD9P-1) (Glu-Trp-Ile EWI motif-containing protein F) (EWI-F) (Prostaglandin F2-alpha receptor regulatory protein) (Prostaglandin F2-alpha receptor-associated protein) (CD antigen CD315)	108272	60760.8	55599.7	196935	57130.9	73767	51987.6	53593.9	84960.7
AP1G2	AP-1 complex subunit gamma-like 2 (Gamma2-adaptin) (G2ad)	81099.9	121250	86979.5	125908	118699	134264	111362	161049	160178
AP1G1	AP-1 complex subunit gamma-1 (Adaptor protein complex AP-1 subunit gamma-1) (Adaptor-related protein complex 1 subunit gamma-1) (Clathrin assembly protein complex 1 gamma-1 large chain) (Gamma1-adaptin) (Golgi adaptor HA1/AP1 adaptin subunit gamma-1)	214443	217549	213633	232627	185321	207579	211171	240629	263251
GFPT1	Glutamine--fructose-6-phosphate aminotransferase [isomerizing] 1 (EC 2.6.1.16) (D-fructose-6-phosphate amidotransferase 1) (Glutamine:fructose-6-phosphate amidotransferase 1) (GFAT 1) (GFAT1) (Hexosephosphate aminotransferase 1)	257948	219374	245524	243511	247520	275975	289366	376179	373858
AARS1	Alanine--tRNA ligase, cytoplasmic (EC 6.1.1.7) (Alanyl-tRNA synthetase) (AlaRS) (Renal carcinoma antigen NY-REN-42)	551340	676349	711598	681515	684194	714709	636917	678819	786603
CLN8	#N/A				217265
WDR3	WD repeat-containing protein 3	2249550	2833460	2662560	2178020	2655210	2144740	1935810	1866170	1818960
WASHC4	WASH complex subunit 4 (Strumpellin and WASH-interacting protein) (SWIP) (WASH complex subunit SWIP)	548355	295572	304138	302960	322864	332134	464232	296743	416921
RABL3	Rab-like protein 3	184714	143743	169344		132657	187948	157933	147834	89657.9
RPL37A	Large ribosomal subunit protein eL43 (60S ribosomal protein L37a)	849369	742637	841862	955047	634533	774301	1032740	1130080	1090590
RB1	#N/A		85844	74971.2		90837.1		128757	73239.2	93210
NIPSNAP3A	#N/A				172685
DIS3	Exosome complex exonuclease RRP44 (EC 3.1.13.-) (EC 3.1.26.-) (Protein DIS3 homolog) (Ribosomal RNA-processing protein 44)	496949	512114	514729	554189	665173	628012	610114	663885	642532
MRPS5	Small ribosomal subunit protein uS5m (28S ribosomal protein S5, mitochondrial) (MRP-S5) (S5mt)	194687	222504	274062	302780	241542	284764	342050	374755	229000
ELP2	Elongator complex protein 2 (ELP2) (SHINC-2) (STAT3-interacting protein 1) (StIP1)	110162	140500	161229	238262	173437	146286	191602	227016	186895
U2AF1	Splicing factor U2AF 35 kDa subunit (U2 auxiliary factor 35 kDa subunit) (U2 small nuclear RNA auxiliary factor 1) (U2 snRNP auxiliary factor small subunit)	5990100	7964500	7181460	5158040	7135310	7591710	6400340	6815090	5969420
GMPPA	#N/A		15755.4			17703.4	19283.4	24780.2	13807.5
ERCC2	General transcription and DNA repair factor IIH helicase subunit XPD (TFIIH subunit XPD) (EC 3.6.4.12) (Basic transcription factor 2 80 kDa subunit) (BTF2 p80) (CXPD) (DNA excision repair protein ERCC-2) (DNA repair protein complementing XP-D cells) (TFIIH basal transcription factor complex 80 kDa subunit) (TFIIH 80 kDa subunit) (TFIIH p80) (Xeroderma pigmentosum group D-complementing protein)	140777	132340	88866.9	275384	131101	210300	217415	187563	159278
DCXR	#N/A	132081	164664	157670	478754	92436.1		145110		157384
C2	Complement C2 (EC 3.4.21.43) (C3/C5 convertase) [Cleaved into: Complement C2b fragment; Complement C2a fragment]	136952	152734	146007	158517	144434	144093	138288	121806	145007
SAFB2	Scaffold attachment factor B2 (SAF-B2)	959598	1546540	1257390	941035	1223210	853501	982214	641966	976968
PIK3C3	Phosphatidylinositol 3-kinase catalytic subunit type 3 (PI3-kinase type 3) (PI3K type 3) (PtdIns-3-kinase type 3) (EC 2.7.1.137) (Phosphatidylinositol 3-kinase p100 subunit) (Phosphoinositide-3-kinase class 3) (hVps34)	106599	117494	123449	58982.1	134911	140805	137329	154251	120604
IFRD2	Interferon-related developmental regulator 2 (Protein SKMC15)	64220.1	70179.6	102759	81909.9	103090	109210	119625	134945	157266
GPI	Glucose-6-phosphate isomerase (GPI) (EC 5.3.1.9) (Autocrine motility factor) (AMF) (Neuroleukin) (NLK) (Phosphoglucose isomerase) (PGI) (Phosphohexose isomerase) (PHI) (Sperm antigen 36) (SA-36)	320483	242160	214661	335773	173345	222474	207440	156926	233653
AK2	#N/A	64712.8	84063.1	66187.4		54976.7	85391.3	66345.8	82274.4	83682.4
RHOG	Rho-related GTP-binding protein RhoG	721673	742459	906850	811584	770826	1002750	925615	974829	943354
ATAD2	ATPase family AAA domain-containing protein 2 (EC 3.6.1.-) (AAA nuclear coregulator cancer-associated protein) (ANCCA)	288155	1178220	1150680	798335	1069500	937729	829590	815892	761671
DHRS7	#N/A	78440.2	125817		334735		125450	81826.5
SERPINA1	Alpha-1-antitrypsin (Alpha-1 protease inhibitor) (Alpha-1-antiproteinase) (Serpin A1) [Cleaved into: Short peptide from AAT (SPAAT)]	3144280	2215870	1978830	2991090	2904820	1978700	1907960	1742410	1821840
	#N/A	217827	40570.9
ZC3HC1	Zinc finger C3HC-type protein 1 (Nuclear-interacting partner of ALK) (hNIPA) (Nuclear-interacting partner of anaplastic lymphoma kinase)	494280	453666	496043	362851	502314	431472	407598	489262	550097
NAMPT	Nicotinamide phosphoribosyltransferase (NAmPRTase) (Nampt) (EC 2.4.2.12) (Pre-B-cell colony-enhancing factor 1) (Pre-B cell-enhancing factor) (Visfatin)	260582	192379	92763.2	232115	125022	170196	149980	141984	168403
HNRNPA0	Heterogeneous nuclear ribonucleoprotein A0 (hnRNP A0)	4565320	4452590	3762080	6927970	3808810	3295150	3230880	3330690	3903530
CUL4A	Cullin-4A (CUL-4A)	43877.8	51486.1	40825.7		69869.8	47846.1	52927.8	67930.7	37531.4
WDR59	GATOR complex protein WDR59 (WD repeat-containing protein 59)	186495	184929	188587	172603	194450	231043	234390	258548	251434
WDR5	WD repeat-containing protein 5 (BMP2-induced 3-kb gene protein)	1326940	1363660	1331930	1367760	1303990	1269080	1277680	1381660	1336720
SYVN1	E3 ubiquitin-protein ligase synoviolin (EC 2.3.2.27) (RING-type E3 ubiquitin transferase synoviolin) (Synovial apoptosis inhibitor 1)	211757	365598	440209	592140	381254	471991	428426	411734	403646
YWHAH	14-3-3 protein eta (Protein AS1)	203527	151235	156581	174798	167105	176809	242333	112007	188031
YWHAB	14-3-3 protein beta/alpha (Protein 1054) (Protein kinase C inhibitor protein 1) (KCIP-1) [Cleaved into: 14-3-3 protein beta/alpha, N-terminally processed]	182467	160419	136144	260155	119105	131263	156664	145760	158163
LIN54	#N/A						32421	39074	45399.1	30439.8
HNRNPLL	Heterogeneous nuclear ribonucleoprotein L-like (hnRNPLL) (Stromal RNA-regulating factor)	23078.8	46738	37746.3		49260.1	43971.6		86790.3	123470
SLC38A7	#N/A				56074.4
HELLS	Lymphoid-specific helicase (EC 3.6.4.-) (Proliferation-associated SNF2-like protein) (SWI/SNF2-related matrix-associated actin-dependent regulator of chromatin subfamily A member 6)	366808	533660	561086	377408	536006	481525	513905	465663	440516
LGALS7	Galectin-7 (Gal-7) (HKL-14) (PI7) (p53-induced gene 1 protein)	2040080	1147070	1460820	15246000	1020740	1125440	1357790	1104230	1918720
ECH1	Delta(3,5)-Delta(2,4)-dienoyl-CoA isomerase, mitochondrial (EC 5.3.3.-)	78087.4	49821.9	28383.4	137465	19531.9	63847	48942.8	26409.2	18388.8
RPLP0	Large ribosomal subunit protein uL10 (60S acidic ribosomal protein P0) (60S ribosomal protein L10E)	1599590	1325960	1265400	1503940	1127090	1491600	1473230	1382680	1427480
WDR83	WD repeat domain-containing protein 83 (Mitogen-activated protein kinase organizer 1) (MAPK organizer 1)	85167.6	91053.5	112565		117189	91130.6	126425	117252	109559
CUL5	Cullin-5 (CUL-5) (Vasopressin-activated calcium-mobilizing receptor 1) (VACM-1)	238016	250162	218212	203797	248321	286352	274068	318808	305189
DHRS4	Dehydrogenase/reductase SDR family member 4 (EC 1.1.1.184) (NADPH-dependent carbonyl reductase) (CR) (NADPH-dependent retinol dehydrogenase/reductase) (NRDR) (humNRDR) (Peroxisomal short-chain alcohol dehydrogenase) (PSCD) (SCAD-SRL) (Short chain dehydrogenase/reductase family 25C member 2) (Protein SDR25C2) (Short-chain dehydrogenase/reductase family member 4)	436666	341417	231947	203652	209724	415603	338694	357741	371837
EMC7	#N/A				68930.9
ATP6V1B2	V-type proton ATPase subunit B, brain isoform (V-ATPase subunit B 2) (Endomembrane proton pump 58 kDa subunit) (HO57) (Vacuolar proton pump subunit B 2)	500286	508449	560216	709788	443531	634421	691619	681331	750870
PGP	#N/A				328984
ME2	#N/A		58471.9	69046.9	84344.3	32248.2	26445.5	51352.6	46891.3	58895.1
TARBP1	Probable methyltransferase TARBP1 (EC 2.1.1.-) (TAR RNA-binding protein 1) (TAR RNA-binding protein of 185 kDa) (TRP-185)	122680	132966	142914	132704	147810	142047	172617	164056	174010
AP1B1	AP-1 complex subunit beta-1 (Adaptor protein complex AP-1 subunit beta-1) (Adaptor-related protein complex 1 subunit beta-1) (Beta-1-adaptin) (Beta-adaptin 1) (Clathrin assembly protein complex 1 beta large chain) (Golgi adaptor HA1/AP1 adaptin beta subunit)	163325	229948	170683	224905	136455	208208	108217	196543	210719
GDAP2	Ganglioside-induced differentiation-associated protein 2	72477.5	61612	58390.9	39901.9	43748.6	83330.8	82550.5	93391.9	87012.8
ABCB9	#N/A	493352	422058	339949	415497	316755	413985	334727	176102	363378
ARL6IP5	PRA1 family protein 3 (ADP-ribosylation factor-like protein 6-interacting protein 5) (ARL-6-interacting protein 5) (Aip-5) (Cytoskeleton-related vitamin A-responsive protein) (Dermal papilla-derived protein 11) (GTRAP3-18) (Glutamate transporter EAAC1-interacting protein) (JM5) (Prenylated Rab acceptor protein 2) (Protein JWa) (Putative MAPK-activating protein PM27)	212421	295097	357457	267008	298250	272940	293116	175466	223019
PISD	Phosphatidylserine decarboxylase proenzyme, mitochondrial (EC 4.1.1.65) [Cleaved into: Phosphatidylserine decarboxylase beta chain; Phosphatidylserine decarboxylase alpha chain]	92920.1	127989	85465.5	100376	122625	122984	167536	103137	130378
NXF1	Nuclear RNA export factor 1 (Tip-associated protein) (Tip-associating protein) (mRNA export factor TAP)	954706	852171	846264	711336	838939	686166	757000	852300	859413
VIPAS39	#N/A				23975.2	12500				56832.2
NAA40	N-alpha-acetyltransferase 40 (EC 2.3.1.257) (N-acetyltransferase 11) (N-alpha-acetyltransferase D) (NatD) (hNatD) (Protein acetyltransferase 1)	121176	128442	105263	35599.6	78720.3	183700	135050	125951	74452.4
FBXO11	F-box only protein 11 (Protein arginine N-methyltransferase 9) (Vitiligo-associated protein 1) (VIT-1)	199456	235093	248266	276576	199739	236005	217842	201861	210341
EIF2B3	Translation initiation factor eIF-2B subunit gamma (eIF-2B GDP-GTP exchange factor subunit gamma)	259955	236206	247365	285933	306948	289486	302704	351695	326198
DDX18	ATP-dependent RNA helicase DDX18 (EC 3.6.4.13) (DEAD box protein 18) (Myc-regulated DEAD box protein) (MrDb)	4490550	5051950	4802750	4012750	4553890	4930800	4371290	3919050	3641370
PFN2	Profilin-2 (Profilin II)	125678	87316.3	49333.8	111585	66546.8	62863.3	61405.1	56462	81751.7
ATP1B1	#N/A	317097	153886	184900	230433		199073	107965	111945
PCCB	Propionyl-CoA carboxylase beta chain, mitochondrial (PCCase subunit beta) (EC 6.4.1.3) (Propanoyl-CoA:carbon dioxide ligase subunit beta)	172073	147996	145726	88522.7	156564	142094	164210	141612	125795
CFAP20	Cilia- and flagella-associated protein 20 (Basal body up-regulated protein 22) (Transcription factor IIB)	338348	354494	385750	350261	389975	345214	356309	402204	379872
USP3	Ubiquitin carboxyl-terminal hydrolase 3 (EC 3.4.19.12) (Deubiquitinating enzyme 3) (Ubiquitin thioesterase 3) (Ubiquitin-specific-processing protease 3)	614335	539575	581198	538819	551560	470156	482354	516747	593741
ZFP62	Zinc finger protein 62 homolog (Zfp-62)	430854	1609430	2087210	1468100	1475610	1262320	1305890	907147	1105090
SF1	Splicing factor 1 (Mammalian branch point-binding protein) (BBP) (mBBP) (Transcription factor ZFM1) (Zinc finger gene in MEN1 locus) (Zinc finger protein 162)	401525	450774	451930	304674	412459	540415	500484	347400	431328
RTN4	Reticulon-4 (Foocen) (Neurite outgrowth inhibitor) (Nogo protein) (Neuroendocrine-specific protein) (NSP) (Neuroendocrine-specific protein C homolog) (RTN-x) (Reticulon-5)	659885	394905	307949	1076710	339609	549299	336493	475241	502605
DAP3	Small ribosomal subunit protein mS29 (28S ribosomal protein S29, mitochondrial) (MRP-S29) (S29mt) (Death-associated protein 3) (DAP-3) (Ionizing radiation resistance conferring protein)		43460.4	58208.1	45706.4	41141.9	12915.1	109853	96542.4	95087.5
ARPC3	Actin-related protein 2/3 complex subunit 3 (Arp2/3 complex 21 kDa subunit) (p21-ARC)	738603	932826	1062100	1023030	880653	1165500	1421240	1054920	1159390
NOL10	Nucleolar protein 10	2169740	2577630	2537950	1994820	2329300	2132560	1994490	1853580	1815290
RPS11	Small ribosomal subunit protein uS17 (40S ribosomal protein S11)	5473520	5775230	6019300	5104390	5542520	7080790	6779680	6631130	5847580
APCS	Serum amyloid P-component (SAP) (9.5S alpha-1-glycoprotein) [Cleaved into: Serum amyloid P-component(1-203)]	899998	643121	543383	936769	525722	593762	535868	520854	587741
NDUFA11	#N/A				146487
CAPZA1	F-actin-capping protein subunit alpha-1 (CapZ alpha-1)	591412	667549	844132	4132240	707561	821055	670776	739800	839090
EIF3F	Eukaryotic translation initiation factor 3 subunit F (eIF3f) (Deubiquitinating enzyme eIF3f) (EC 3.4.19.12) (Eukaryotic translation initiation factor 3 subunit 5) (eIF-3-epsilon) (eIF3 p47)	364445	308595	279611	405765	285894	326841	387165	303937	330455
LIMS1	LIM and senescent cell antigen-like-containing domain protein 1 (Particularly interesting new Cys-His protein 1) (PINCH-1) (Renal carcinoma antigen NY-REN-48)	368027	388476	384452	340259	408962	400246	371549	563095	546039
PPP2CA;PPP2CB	Serine/threonine-protein phosphatase 2A catalytic subunit beta isoform (PP2A-beta) (EC 3.1.3.16)	370826	367721	359474	358557	385852	384620	389821	382940	433399
RSL24D1	Probable ribosome biogenesis protein RLP24 (Ribosomal L24 domain-containing protein 1) (Ribosomal protein L24-like)	467159	579505	640579	899462	639422	506823	293653	389370	384048
CNBP	CCHC-type zinc finger nucleic acid binding protein (Cellular nucleic acid-binding protein) (CNBP) (Zinc finger protein 9)	239370	230941	168987	207002	240136	297655	250982	256619	292473
TIAL1	Nucleolysin TIAR (TIA-1-related protein)	8250320	8161550	6807850	6226990	7389150	6303410	6554460	6388450	5903400
RAB3D	#N/A	106331	92191.3	58163.5		43435.7	91009.5	56803.9	61763	56437.5
NUP85	Nuclear pore complex protein Nup85 (85 kDa nucleoporin) (FROUNT) (Nucleoporin Nup75) (Nucleoporin Nup85) (Pericentrin-1)	345799	513564	470809	378402	440229	469896	451446	530958	531898
WDR24	#N/A	59415.4	62247	61334.7	201922	38681	71565.6	68504.8	80946.2	78208.6
HNRNPDL	Heterogeneous nuclear ribonucleoprotein D-like (hnRNP D-like) (hnRNP DL) (AU-rich element RNA-binding factor) (JKT41-binding protein) (Protein laAUF1)	7238370	5663270	5812280	6084360	6541840	4829510	4432240	4421370	4802940
	#N/A	137769	71639.8					109468	25396.5	80080.7
TGM3	Protein-glutamine gamma-glutamyltransferase E (EC 2.3.2.13) (Transglutaminase E) (TG(E)) (TGE) (TGase E) (Transglutaminase-3) (TGase-3) [Cleaved into: Protein-glutamine gamma-glutamyltransferase E 50 kDa catalytic chain; Protein-glutamine gamma-glutamyltransferase E 27 kDa non-catalytic chain]	1767680	1400080	1098440	17489200	1063230	1214950	1449530	1393070	2093760
IPO8	#N/A		64405.5	59301.2	85434.9	72149		65191	75958	85444.8
CREBBP	CREB-binding protein (Histone lysine acetyltransferase CREBBP) (EC 2.3.1.48) (Protein-lysine acetyltransferase CREBBP) (EC 2.3.1.-)	168664	159872	149799	187414	166933	153077	160474	176061	184631
SRSF5	Serine/arginine-rich splicing factor 5 (Delayed-early protein HRS) (Pre-mRNA-splicing factor SRP40) (Splicing factor, arginine/serine-rich 5)	104044	79401.4	110995	125520	73724.8	107883	120883	106045	108355
RPS6KA5	Ribosomal protein S6 kinase alpha-5 (S6K-alpha-5) (EC 2.7.11.1) (90 kDa ribosomal protein S6 kinase 5) (Nuclear mitogen- and stress-activated protein kinase 1) (RSK-like protein kinase) (RSKL)		31002.8	33795.5		32022	64113.1	61181.8
SRSF9	Serine/arginine-rich splicing factor 9 (Pre-mRNA-splicing factor SRp30C) (Splicing factor, arginine/serine-rich 9)	333384	221064	248269	214368	265182	330233	306635	323450	300329
SRSF2	Serine/arginine-rich splicing factor 2 (Protein PR264) (Splicing component, 35 kDa) (Splicing factor SC35) (SC-35) (Splicing factor, arginine/serine-rich 2)	1516610	1049420	1198010	626217	902193	919341	1103790	1016640	1262980
SRSF1	Serine/arginine-rich splicing factor 1 (Alternative-splicing factor 1) (ASF-1) (Splicing factor, arginine/serine-rich 1) (pre-mRNA-splicing factor SF2, P33 subunit)	2439570	1558990	1634560	1450230	1428880	1864940	1669130	1656660	1709720
NCF4	Neutrophil cytosol factor 4 (NCF-4) (Neutrophil NADPH oxidase factor 4) (SH3 and PX domain-containing protein 4) (p40-phox) (p40phox)	115647	115271	97344	91349.8	122425	156101	144026	188779	145507
NDUFA9	NADH dehydrogenase [ubiquinone] 1 alpha subcomplex subunit 9, mitochondrial (Complex I-39kD) (CI-39kD) (NADH-ubiquinone oxidoreductase 39 kDa subunit)	365525	585783	737598	591285	549320	772436	853159	700593	783783
TM9SF3	Transmembrane 9 superfamily member 3 (EP70-P-iso) (SM-11044-binding protein)	99551.2	158286	187908	549688	151585	161421	155994	129491	153632
STT3A	Dolichyl-diphosphooligosaccharide--protein glycosyltransferase subunit STT3A (Oligosaccharyl transferase subunit STT3A) (STT3-A) (EC 2.4.99.18) (B5) (Integral membrane protein 1) (Transmembrane protein TMC)	1365450	2000270	2307760	2546690	2070160	2479890	2920840	2457900	2381070
WDR48	WD repeat-containing protein 48 (USP1-associated factor 1) (WD repeat endosomal protein) (p80)	183925	168659	168702	83993.1	172133	214794	193711	184947	200766
ABCD1	#N/A	75848.4	113168	82172.3		70010.6	65021.5	88541.3	97441.8	147310
CORO1A	Coronin-1A (Coronin-like protein A) (Clipin-A) (Coronin-like protein p57) (Tryptophan aspartate-containing coat protein) (TACO)	3757150	4566770	5724900	4568360	4618240	6134060	7049820	6205770	6507880
SLC30A5	Proton-coupled zinc antiporter SLC30A5 (Solute carrier family 30 member 5) (Zinc transporter 5) (ZnT-5) (ZnT-like transporter 1) (hZTL1)	64242.3	123811	143461	58130.1	100245	130856	149826	160936	90754.6
PRPF38A	Pre-mRNA-splicing factor 38A	360864	248124	253058	182146	217856	282557	270634	288468	246566
INTS13	Integrator complex subunit 13 (Cell cycle regulator Mat89Bb homolog) (Germ cell tumor 1) (Protein asunder homolog) (Sarcoma antigen NY-SAR-95)	417295	473257	421372	382471	432760	467531	458913	449825	394840
MCU	Calcium uniporter protein, mitochondrial (HsMCU) (Coiled-coil domain-containing protein 109A)	73203.8	66994.6	63031.4	129012	69447.2	78972.9	115188	126079	121875
PDHB	Pyruvate dehydrogenase E1 component subunit beta, mitochondrial (PDHE1-B) (EC 1.2.4.1)	249990	278099	381358	286002	298539	352892	395617	524375	430889
CHERP	Calcium homeostasis endoplasmic reticulum protein (ERPROT 213-21) (SR-related CTD-associated factor 6)	634364	552566	528474	498082	541581	614805	662999	520158	635339
RASA2	Ras GTPase-activating protein 2 (GTPase-activating protein 1m) (GAP1m)	181972	186097	180009	133892	168089	175676	185143	172616	185722
PGRMC2	Membrane-associated progesterone receptor component 2 (Progesterone membrane-binding protein) (Steroid receptor protein DG6)	74948.6	87851.2	111357		33688	125551	112267	108482	60623.1
APOC3	Apolipoprotein C-III (Apo-CIII) (ApoC-III) (Apolipoprotein C3)	216194	142542	112110	435136	60659.2	127328	156690	111567	147177
APEX2	DNA-(apurinic or apyrimidinic site) endonuclease 2 (EC 3.1.11.2) (AP endonuclease XTH2) (APEX nuclease 2) (APEX nuclease-like 2) (Apurinic-apyrimidinic endonuclease 2) (AP endonuclease 2)	74031.9	47123.4	69324.7		67171.4	78925.3	84724.8	68892.1	99931.6
DPF2	Zinc finger protein ubi-d4 (Apoptosis response zinc finger protein) (BRG1-associated factor 45D) (BAF45D) (D4, zinc and double PHD fingers family 2) (Protein requiem)	242297	520843	462291	427890	472296	340676	433995	362353	366328
CIRBP	#N/A	60991	28473.5	46213.8		38760.6	46698.7	31940.2	14573.1
INTS7	Integrator complex subunit 7 (Int7)	500430	464389	419906	313305	512478	516789	466555	519361	539985
RPS4X	Small ribosomal subunit protein eS4, X isoform (40S ribosomal protein S4) (SCR10) (Single copy abundant mRNA protein)	3514090	4227470	4366620	3581660	4093330	5095820	5179800	5325600	4887080
TLE3	Transducin-like enhancer protein 3 (Enhancer of split groucho-like protein 3) (ESG3)	415721	440144	395098	420489	440358	388584	373459	479023	470750
DENND4B	DENN domain-containing protein 4B	158285	146910	147757		195016	167556	171956	176158	190412
UBE4A	#N/A		16780.5			19929.3	27042	34701.7	27940	15842.8
CFB	Complement factor B (EC 3.4.21.47) (C3/C5 convertase) (Glycine-rich beta glycoprotein) (GBG) (PBF2) (Properdin factor B) [Cleaved into: Complement factor B Ba fragment; Complement factor B Bb fragment]	593257	392863	360042	581528	390165	386850	402057	280259	397354
EIF2S2	Eukaryotic translation initiation factor 2 subunit 2 (Eukaryotic translation initiation factor 2 subunit beta) (eIF-2-beta)	1050620	1103860	1076090	926131	1002790	1109610	1192910	1240550	1175910
NKRF	NF-kappa-B-repressing factor (NFkB-repressing factor) (NRF) (Protein ITBA4)	1576820	1858110	1733550	1354660	1726990	1367040	1338860	1127900	1009140
	NFKB repressing factor	178185	208937	242070	256039	251478	164755	93619.2	126305	87596.6
TAF1	Transcription initiation factor TFIID subunit 1 (EC 2.3.1.48) (EC 2.7.11.1) (Cell cycle gene 1 protein) (TBP-associated factor 250 kDa) (p250) (Transcription initiation factor TFIID 250 kDa subunit) (TAF(II)250) (TAFII-250) (TAFII250)	42153.6	147366	134739	137796	138618	82417.7	76714.3	89689.8	69041.1
DCD	Dermcidin (EC 3.4.-.-) (Preproteolysin) [Cleaved into: Survival-promoting peptide; DCD-1]	4072820	2112370	1727640	2631400	2033830	1991980	2124200	2389040	1986080
ARF4	#N/A	119262	84727.1	88264.1	165531		109301	65515.5	75774.8	66542.8
ARF5	ADP-ribosylation factor 5	156649	155813	161109	144066	139619	176444	201459	198888	156468
SURF6	Surfeit locus protein 6	354912	514578	491814		461793	547191	486673	381233	348698
DDX49	Probable ATP-dependent RNA helicase DDX49 (EC 3.6.4.13) (DEAD box protein 49)	893434	990472	935722	624006	747035	905539	860091	798740	839953
API5	Apoptosis inhibitor 5 (API-5) (Antiapoptosis clone 11 protein) (AAC-11) (Cell migration-inducing gene 8 protein) (Fibroblast growth factor 2-interacting factor) (FIF) (Protein XAGL)	99073.4	72282.3	117783	89626.4	78477.8	140333	100310	92620.6	73787.2
ACTBL2	Beta-actin-like protein 2 (Kappa-actin)	171834	683740	443038	582419	569421	409692	849558	493900	1267200
TRAF2	TNF receptor-associated factor 2 (EC 2.3.2.27) (E3 ubiquitin-protein ligase TRAF2) (RING-type E3 ubiquitin transferase TRAF2) (Tumor necrosis factor type 2 receptor-associated protein 3)	185244	166800	118755	72726.1	145933	158217	141772	255451	306246
RRP15	RRP15-like protein (Ribosomal RNA-processing protein 15)	97740.5	100277	137466	104981	85477.9	121307	117579	134879	128532
UTP15	U3 small nucleolar RNA-associated protein 15 homolog	5735230	7479190	6452710	5296440	6586720	5745610	5351960	5211460	4777780
SCD	Stearoyl-CoA desaturase (hSCD1) (EC 1.14.19.1) (Acyl-CoA desaturase) (Delta(9)-desaturase) (Delta-9 desaturase) (Fatty acid desaturase)	75120.9	71147.1	121527	29560.2	80586.5	79462.8	92064.8	103254	88061.1
SUB1	Activated RNA polymerase II transcriptional coactivator p15 (Positive cofactor 4) (PC4) (SUB1 homolog) (p14)	655462	464210	468964	429846	371460	337905	408844	373310	344030
GTPBP1	GTP-binding protein 1 (G-protein 1) (GP-1) (GP1)	274478	270204	250246	275933	248361	263793	257039	240094	263708
CAPN1	Calpain-1 catalytic subunit (EC 3.4.22.52) (Calcium-activated neutral proteinase 1) (CANP 1) (Calpain mu-type) (Calpain-1 large subunit) (Cell proliferation-inducing gene 30 protein) (Micromolar-calpain) (muCANP)	408566	347273	246951	3272670	239279	275726	292027	300403	443533
RBM12	RNA-binding protein 12 (RNA-binding motif protein 12) (SH3/WW domain anchor protein in the nucleus) (SWAN)	215181	165007	162454	179797	165222	244869	262325	173547	207548
TECR	Very-long-chain enoyl-CoA reductase (EC 1.3.1.93) (Synaptic glycoprotein SC2) (Trans-2,3-enoyl-CoA reductase) (TER)	264448	591376	709239	1658960	555269	503185	489785	535839	578881
MBOAT2	#N/A				68137.4
SLC25A20	Mitochondrial carnitine/acylcarnitine carrier protein (Carnitine/acylcarnitine translocase) (CAC) (CACT) (Solute carrier family 25 member 20)	385933	349711	461822	454694	375634	424816	464393	505146	362986
RBBP4	Histone-binding protein RBBP4 (Chromatin assembly factor 1 subunit C) (CAF-1 subunit C) (Chromatin assembly factor I p48 subunit) (CAF-I 48 kDa subunit) (CAF-I p48) (Nucleosome-remodeling factor subunit RBAP48) (Retinoblastoma-binding protein 4) (RBBP-4) (Retinoblastoma-binding protein p48)	4949600	5660360	5373450	4390170	5868080	5029300	5526840	5424840	6012240
CWC22	Pre-mRNA-splicing factor CWC22 homolog (Nucampholin homolog) (fSAPb)	273348	284535	302543	255577	276839	253240	320020	323795	312749
BOP1	Ribosome biogenesis protein BOP1 (Block of proliferation 1 protein)	3308670	3981100	3685580	2941240	3457210	3468430	3414660	2885440	2962440
RPL9	Large ribosomal subunit protein uL6 (60S ribosomal protein L9)	3396290	3567650	3604140	3661790	3153320	3996610	4174260	3617570	3750400
PSMD6	26S proteasome non-ATPase regulatory subunit 6 (26S proteasome regulatory subunit RPN7) (26S proteasome regulatory subunit S10) (Breast cancer-associated protein SGA-113M) (Phosphonoformate immuno-associated protein 4) (Proteasome regulatory particle subunit p44S10) (p42A)	61466.3		40762.5	125770	40287.1	32437.4	33526.9	52726.2	34840.1
EIF4A3	Eukaryotic initiation factor 4A-III (eIF-4A-III) (eIF4A-III) (EC 3.6.4.13) (ATP-dependent RNA helicase DDX48) (ATP-dependent RNA helicase eIF4A-3) (DEAD box protein 48) (Eukaryotic initiation factor 4A-like NUK-34) (Eukaryotic translation initiation factor 4A isoform 3) (Nuclear matrix protein 265) (NMP 265) (hNMP 265) [Cleaved into: Eukaryotic initiation factor 4A-III, N-terminally processed]	5774740	6115870	6024640	5358280	6026340	6248510	6444330	6306890	6050480
MTA3	Metastasis-associated protein MTA3	560364	805708	783410	628898	783012	645234	755251	826965	892922
ZNHIT6	Box C/D snoRNA protein 1 (Serologically defined breast cancer antigen NY-BR-75) (Zinc finger HIT domain-containing protein 6)	153870	401011	417905	54715.6	427533	397896	452886	461201	396490
ERAL1	#N/A	92702.8	83941	66440.8	23891.1	38397	54562.7	92684.4	111028	116219
MTPAP	Poly(A) RNA polymerase, mitochondrial (PAP) (EC 2.7.7.19) (PAP-associated domain-containing protein 1) (Polynucleotide adenylyltransferase) (Terminal uridylyltransferase 1) (TUTase 1) (mtPAP)	387282	317895	386851	269051	291853	304972	726453	537855	407433
FOXK1	Forkhead box protein K1 (Myocyte nuclear factor) (MNF)	256985	355469	307393	425925	301717	391173	485059	307486	376793
NOL8	Nucleolar protein 8 (Nucleolar protein Nop132)	91321.7	150216	144427	98800	155845	86289.3	63886.1	77873	91681.3
LSM14A	#N/A	28478.6	88859.5	62218.7	129035	50965.4	102965	100406	76020.3	54715.3
EED	Polycomb protein EED (hEED) (Embryonic ectoderm development protein) (WD protein associating with integrin cytoplasmic tails 1) (WAIT-1)	1180270	1171520	1164170	1119040	1138120	1166600	1158650	1210820	1023450
SARS1	Serine--tRNA ligase, cytoplasmic (EC 6.1.1.11) (Seryl-tRNA synthetase) (SerRS) (Seryl-tRNA(Ser/Sec) synthetase)	243275	294821	223087	226289	223221	260890	238267	211085	214208
CWC25	Pre-mRNA-splicing factor CWC25 homolog (Coiled-coil domain-containing protein 49) (Spliceosome-associated protein homolog CWC25)	260352	245238	239953	207641	222657	221962	197407	197978	221891
NCBP2	Nuclear cap-binding protein subunit 2 (20 kDa nuclear cap-binding protein) (Cell proliferation-inducing gene 55 protein) (NCBP 20 kDa subunit) (CBP20) (NCBP-interacting protein 1) (NIP1)	532151	434997	430368	268962	534776	423877	418122	405898	452147
TMEM109	Transmembrane protein 109 (Mitsugumin-23) (Mg23)	129761	125158	83079.8	173135	25027	118249	81963.6	87945.3	75305.4
CDCA8	#N/A	399988	2703980	2280590	1218970	538763	1680790	1695880	878285	1209810
TGS1	Trimethylguanosine synthase (EC 2.1.1.-) (CLL-associated antigen KW-2) (Cap-specific guanine-N2 methyltransferase) (Hepatocellular carcinoma-associated antigen 137) (Nuclear receptor coactivator 6-interacting protein) (PRIP-interacting protein with methyltransferase motif) (PIMT) (PIPMT)	54298.5	75194.3	73575.8	34491	72711.1	77161.6	92105	102875	94771.5
ACAD9	Complex I assembly factor ACAD9, mitochondrial (Acyl-CoA dehydrogenase family member 9) (ACAD-9) (EC 1.3.8.-)	690634	605718	638020	672828	447644	655455	898315	822211	838054
VPS33A	#N/A		43087.5	64906.6		41421.2	47050.2	60313.4	60737.4	43202.4
PPP4C	Serine/threonine-protein phosphatase 4 catalytic subunit (PP4C) (Pp4) (EC 3.1.3.16) (Protein phosphatase X) (PP-X)	250495	340326	364492	417899	409479	378705	307713	525747	499862
PPIL4	Peptidyl-prolyl cis-trans isomerase-like 4 (PPIase) (EC 5.2.1.8) (Cyclophilin-like protein PPIL4) (Rotamase PPIL4)	417084	298279	313341	310560	375138	311181	372803	249880	361391
DEK	Protein DEK	190740	213365	255112	209661	185274	296954	333529	204822	193775
DDX50	ATP-dependent RNA helicase DDX50 (EC 3.6.4.13) (DEAD box protein 50) (Gu-beta) (Nucleolar protein Gu2)	670419	1162660	1149070	754546	975187	1013620	904134	1183040	882646
ZNF771	Zinc finger protein 771 (Mesenchymal stem cell protein DSC43)			56693.1		19803	52488.9	21309.3	17909.2
SLC25A4	ADP/ATP translocase 1 (ADP,ATP carrier protein 1) (ADP,ATP carrier protein, heart/skeletal muscle isoform T1) (Adenine nucleotide translocator 1) (ANT 1) (Solute carrier family 25 member 4)	197284	285242	525899	474896	460722	367366	189047	523692	255155
DDX3X	ATP-dependent RNA helicase DDX3X (EC 3.6.4.13) (CAP-Rf) (DEAD box protein 3, X-chromosomal) (DEAD box, X isoform) (DBX) (Helicase-like protein 2) (HLP2)	6747840	7007520	6895000	6129230	7174660	6087660	5873510	5418140	5019530
DDX39A	ATP-dependent RNA helicase DDX39A (EC 3.6.4.13) (DEAD box protein 39) (Nuclear RNA helicase URH49)	501249	550661	651114	784541	634447	504962	471467	478299	359323
MAST2	#N/A	394993	553150	534465			486092	450283	211177	478456
PPIB	Peptidyl-prolyl cis-trans isomerase B (PPIase B) (EC 5.2.1.8) (CYP-S1) (Cyclophilin B) (Rotamase B) (S-cyclophilin) (SCYLP)	4016200	2971070	2977750	3644470	2706800	2471100	2375140	2355270	2063630
PPIL1	Peptidyl-prolyl cis-trans isomerase-like 1 (PPIase) (EC 5.2.1.8) (Rotamase PPIL1)	226210	179112	195478	332693	208939	125453	163346	134796	151062
PPIG	#N/A	72732	59541.8	82290.8		54656.8	49770.7	67792.4	75042.8
FIZ1	Flt3-interacting zinc finger protein 1 (Zinc finger protein 798)	89117	223953	214880	148292	186260	200988	195313	162574	158851
PNN	Pinin (140 kDa nuclear and cell adhesion-related phosphoprotein) (Desmosome-associated protein) (Domain-rich serine protein) (DRS protein) (DRSP) (Melanoma metastasis clone A protein) (Nuclear protein SDK3) (SR-like protein)	210708	300126	355756	248509	302528	289629	236601	215591	182493
GSTZ1	#N/A				66777.9
INTS6	Integrator complex subunit 6 (Int6) (DBI-1) (Protein DDX26) (Protein deleted in cancer 1) (DICE1)	147621	140415	142029	86034.1	164927	194895	195999	155579	178106
PTBP3	Polypyrimidine tract-binding protein 3 (Regulator of differentiation 1) (Rod1)	4678140	4794530	4320240	3461410	4136870	4257020	4141120	4422210	4152630
ARHGAP11A	#N/A	100438	134644	144657	85400.1	115416	103210	127227	124925	103882
ATP5MF	ATP synthase subunit f, mitochondrial (ATP synthase membrane subunit f)	78827.6	37022.4	63225.5	48065	32391.1	49019.9		26435.4
ACAA2	3-ketoacyl-CoA thiolase, mitochondrial (EC 2.3.1.16) (Acetyl-CoA acetyltransferase) (EC 2.3.1.9) (Acetyl-CoA acyltransferase) (Acyl-CoA hydrolase, mitochondrial) (EC 3.1.2.-, EC 3.1.2.1, EC 3.1.2.2) (Beta-ketothiolase) (Mitochondrial 3-oxoacyl-CoA thiolase) (T1)	108595	111628	131864	108504	97036.7	137674	136994	153117	149023
PGRMC1	#N/A	40701.1	50344.4	45763.4			41975.9	47662	45528.4	56635.3
ARRB2	#N/A		30782.7	58682.8
ASH2L	Set1/Ash2 histone methyltransferase complex subunit ASH2 (ASH2-like protein)	816905	999096	938855	837531	971294	902815	868975	818116	942864
PLAA	Phospholipase A-2-activating protein (PLA2P) (PLAP)	959351	929104	969947	947735	1057310	947755	959172	1146640	1101310
BRCC3	Lys-63-specific deubiquitinase BRCC36 (EC 3.4.19.-) (BRCA1-A complex subunit BRCC36) (BRCA1/BRCA2-containing complex subunit 3) (BRCA1/BRCA2-containing complex subunit 36) (BRISC complex subunit BRCC36)	311720	251318	301446	241936	262388	255859	261389	273153	314299
PRKAA1	5'-AMP-activated protein kinase catalytic subunit alpha-1 (AMPK subunit alpha-1) (EC 2.7.11.1) (Acetyl-CoA carboxylase kinase) (ACACA kinase) (EC 2.7.11.27) (Hydroxymethylglutaryl-CoA reductase kinase) (HMGCR kinase) (EC 2.7.11.31) (Tau-protein kinase PRKAA1) (EC 2.7.11.26)	249710	236279	237779	204092	200145	259602	255168	282080	304898
LTF	Lactotransferrin (Lactoferrin) (EC 3.4.21.-) (Growth-inhibiting protein 12) (Talalactoferrin) [Cleaved into: Lactoferricin-H (Lfcin-H); Kaliocin-1; Lactoferroxin-A; Lactoferroxin-B; Lactoferroxin-C]	5521930	3772990	3340240	4992520	2853800	3568830	3480710	2952120	3213990
KCTD10	BTB/POZ domain-containing adapter for CUL3-mediated RhoA degradation protein 3 (hBACURD3) (BTB/POZ domain-containing protein KCTD10) (Potassium channel tetramerization domain-containing protein 10)	157594	137780	118402	72821.2	160603	175607	196531	172926	180779
SNIP1	Smad nuclear-interacting protein 1 (FHA domain-containing protein SNIP1)	216851	767605	713878	828910	731598	551265	512394	490390	501709
PDIA3	Protein disulfide-isomerase A3 (EC 5.3.4.1) (58 kDa glucose-regulated protein) (58 kDa microsomal protein) (p58) (Disulfide isomerase ER-60) (Endoplasmic reticulum resident protein 57) (ER protein 57) (ERp57) (Endoplasmic reticulum resident protein 60) (ER protein 60) (ERp60)	1393470	1098940	1021570	1502240	915143	1096560	1080230	1113170	1207300
TAF5	Transcription initiation factor TFIID subunit 5 (Transcription initiation factor TFIID 100 kDa subunit) (TAF(II)100) (TAFII-100) (TAFII100)	308839	464602	466465	351214	434202	371414	369253	352871	340906
PUM3	Pumilio homolog 3 (HBV X-transactivated gene 5 protein) (HBV XAg-transactivated protein 5) (Minor histocompatibility antigen HA-8) (HLA-HA8)	146879	221902	186724	117110	163134	200498	213396	182652	125263
RBBP5	Retinoblastoma-binding protein 5 (RBBP-5) (Retinoblastoma-binding protein RBQ-3)	284001	359652	303805	303688	338611	364370	329050	355999	347843
IGHM	Immunoglobulin heavy constant mu (Ig mu chain C region) (Ig mu chain C region BOT) (Ig mu chain C region GAL) (Ig mu chain C region OU)	6602390	4513320	3971120	6881180	3946830	4235400	3977910	3609700	4178320
TRAPPC1	Trafficking protein particle complex subunit 1 (BET5 homolog) (Multiple myeloma protein 2) (MUM-2)	87602.5	100145	118846	122672	81964.5	136552	125775	114815	119722
FRG1	Protein FRG1 (FSHD region gene 1 protein)	931436	1302670	1155900	1313640	1278120	1216990	1067310	1227840	1234130
LPO	Lactoperoxidase (LPO) (EC 1.11.1.7) (Salivary peroxidase) (SPO)	508246	321193	283968	541786	210388	291256	298701	251799	306041
ARCN1	Coatomer subunit delta (Archain) (Delta-coat protein) (Delta-COP)	553426	576625	553910	509839	656424	586892	569937	692420	694215
ILVBL	2-hydroxyacyl-CoA lyase 2 (EC 4.1.2.-) (Acetolactate synthase-like protein) (IlvB-like protein)				60737.1
DNAJB11	DnaJ homolog subfamily B member 11 (APOBEC1-binding protein 2) (ABBP-2) (DnaJ protein homolog 9) (ER-associated DNAJ) (ER-associated Hsp40 co-chaperone) (Endoplasmic reticulum DNA J domain-containing protein 3) (ER-resident protein ERdj3) (ERdj3) (ERj3p) (HEDJ) (Human DnaJ protein 9) (hDj-9) (PWP1-interacting protein 4)	87522.3	99538	93908.4	123504	77174.6	97191.8	96423.6	110965	85060.8
HDAC1	Histone deacetylase 1 (HD1) (EC 3.5.1.98) (Protein deacetylase HDAC1) (EC 3.5.1.-) (Protein decrotonylase HDAC1) (EC 3.5.1.-)	1919040	2550020	2764460	2493010	2721730	2264530	2271380	2588630	2318860
HDAC2	Histone deacetylase 2 (HD2) (EC 3.5.1.98) (Protein deacylase HDAC2) (EC 3.5.1.-)	383860	478956	523435	401681	382520	467991	535338	499731	387352
EIF4E	#N/A	85191.1	66166.5	43376.2	144392	55174.5	81673.5	101411	65968.2	51759.5
N4BP2L2	NEDD4-binding protein 2-like 2 (Phosphonoformate immuno-associated protein 5)		435253	439413	412272	688103	286039	287811	238961	249571
PSMB7	Proteasome subunit beta type-7 (EC 3.4.25.1) (Macropain chain Z) (Multicatalytic endopeptidase complex chain Z) (Proteasome subunit Z)	202315	196932	129889	1411630	117304	158206	150555	143114	175570
FZR1	#N/A		36096	24003.5		25011.4	28442.1		15996.8	23043.5
USP5	Ubiquitin carboxyl-terminal hydrolase 5 (EC 3.4.19.12) (Deubiquitinating enzyme 5) (Isopeptidase T) (Ubiquitin thioesterase 5) (Ubiquitin-specific-processing protease 5)	719338	554387	528271	618937	709863	685141	717995	760337	763595
RPL19	Large ribosomal subunit protein eL19 (60S ribosomal protein L19)	1365940	786588	1074870	907552	745232	1070020	1107400	1070540	904210
PARK7	Parkinson disease protein 7 (Maillard deglycase) (Oncogene DJ1) (Parkinsonism-associated deglycase) (Protein DJ-1) (DJ-1) (Protein/nucleic acid deglycase DJ-1) (EC 3.1.2.-, EC 3.5.1.-, EC 3.5.1.124)	392977	378585	322696	3099050	337362	367902	342482	398786	529766
SELENBP1	Methanethiol oxidase (MTO) (EC 1.8.3.4) (56 kDa selenium-binding protein) (SBP56) (SP56) (Selenium-binding protein 1)				81556.2	21783.2	27329.1
INTS6L	#N/A	31392		7758.04	25048.4	35770.8	28654.5			34809.1
TCF20	Transcription factor 20 (TCF-20) (Nuclear factor SPBP) (Protein AR1) (Stromelysin-1 PDGF-responsive element-binding protein) (SPRE-binding protein)	319816	1179860	1369940	773487	732829	592629	597892	532753	606582
INTS3	Integrator complex subunit 3 (Int3) (SOSS complex subunit A) (Sensor of single-strand DNA complex subunit A) (SOSS-A) (Sensor of ssDNA subunit A)	576718	976966	977792	683977	836624	1086120	806056	844435	945360
ARAF	Serine/threonine-protein kinase A-Raf (EC 2.7.11.1) (Proto-oncogene A-Raf) (Proto-oncogene A-Raf-1) (Proto-oncogene Pks)	220630	205199	230300	170371	264523	274210	241410	298431	282730
DNAJA2	DnaJ homolog subfamily A member 2 (Cell cycle progression restoration gene 3 protein) (Dnj3) (Dj3) (HIRA-interacting protein 4) (Renal carcinoma antigen NY-REN-14)	607561	830205	902859	875991	947441	942677	933728	1218010	1095880
DTL	#N/A	75736.5	98386.1	68462.7	69205	79057.3	118562	85584.9	91992.6	67397.4
TBL1XR1	F-box-like/WD repeat-containing protein TBL1XR1 (Nuclear receptor corepressor/HDAC3 complex subunit TBLR1) (TBL1-related protein 1) (Transducin beta-like 1X-related protein 1)	105003	116563	128564	136147	161088	152271	185680	207357	222331
TRMT1L	TRMT1-like protein (EC 2.1.1.-)		26079.8	25758.2			36341	26237.2	44219	46426.8
GLS	Glutaminase kidney isoform, mitochondrial (GLS) (EC 3.5.1.2) (K-glutaminase) (L-glutamine amidohydrolase) [Cleaved into: Glutaminase kidney isoform, mitochondrial 68 kDa chain; Glutaminase kidney isoform, mitochondrial 65 kDa chain]	489841	421936	527820	336556	465139	438812	557220	668872	618377
CSTF1	Cleavage stimulation factor subunit 1 (CF-1 50 kDa subunit) (Cleavage stimulation factor 50 kDa subunit) (CSTF 50 kDa subunit) (CstF-50)	532486	621676	646214	754682	739567	616270	613312	642673	631360
NSUN2	RNA cytosine C(5)-methyltransferase NSUN2 (EC 2.1.1.-) (Myc-induced SUN domain-containing protein) (Misu) (NOL1/NOP2/Sun domain family member 2) (Substrate of AIM1/Aurora kinase B) (mRNA cytosine C(5)-methyltransferase) (EC 2.1.1.-) (tRNA cytosine C(5)-methyltransferase) (EC 2.1.1.-, EC 2.1.1.203) (tRNA methyltransferase 4 homolog) (hTrm4)	1605250	1503050	1473920	1233780	1725010	1591250	1539240	1644650	1578930
	#N/A		144711	85255.1	39307.3	127794	62314	83435.4	96506.8	24467
SNRPD3	Small nuclear ribonucleoprotein Sm D3 (Sm-D3) (snRNP core protein D3)	6173270	5133730	5817430	5558560	5390220	5262450	5510630	5765770	5586400
AGL	Glycogen debranching enzyme (Glycogen debrancher) [Includes: 4-alpha-glucanotransferase (EC 2.4.1.25) (Oligo-1,4-1,4-glucantransferase); Amylo-alpha-1,6-glucosidase (Amylo-1,6-glucosidase) (EC 3.2.1.33) (Dextrin 6-alpha-D-glucosidase)]	86111.6	58090.4	44347.2	231320	64126.5	49817.5	49799.7	79563.2	95159.6
DNAJB1	DnaJ homolog subfamily B member 1 (DnaJ protein homolog 1) (Heat shock 40 kDa protein 1) (HSP40) (Heat shock protein 40) (Human DnaJ protein 1) (hDj-1)	239830	218237	172575	199224	197894	310022	296335	218564	244123
CDC45	Cell division control protein 45 homolog (PORC-PI-1)	138904	153028	115030	143613	81708.4	143477	163710	185858	161125
PIGU	Phosphatidylinositol glycan anchor biosynthesis class U protein (Cell division cycle protein 91-like 1) (Protein CDC91-like 1) (GPI transamidase component PIG-U)	132936	148475	248308	274998	204813	244903	236584	249145	238293
ASS1	Argininosuccinate synthase (EC 6.3.4.5) (Citrulline--aspartate ligase)	231150	215300	199000	530258	205274	203746	274999	261716	291906
RPL23	Large ribosomal subunit protein uL14 (60S ribosomal protein L17) (60S ribosomal protein L23)	3915230	4308310	4204820	3865970	3898880	4975940	4707700	4726920	4269020
ARPC1A	Actin-related protein 2/3 complex subunit 1A (SOP2-like protein)	260705	355136	550736	676753	502997	488479	618071	512403	520402
RBM15	RNA-binding protein 15 (One-twenty two protein 1) (RNA-binding motif protein 15)	902617	1006170	1007810	838339	993123	883422	950215	982214	913861
RBPJ	Recombining binding protein suppressor of hairless (CBF-1) (J kappa-recombination signal-binding protein) (RBP-J kappa) (RBP-J) (RBP-JK) (Renal carcinoma antigen NY-REN-30)	856320	894362	913613	790265	904150	779780	837292	733069	680529
HRG	Histidine-rich glycoprotein (Histidine-proline-rich glycoprotein) (HPRG)	245548	424005	404121	632428	579972	358018	258532	352326	587663
CAPRIN1	Caprin-1 (Cell cycle-associated protein 1) (Cytoplasmic activation- and proliferation-associated protein 1) (GPI-anchored membrane protein 1) (GPI-anchored protein p137) (GPI-p137) (p137GPI) (Membrane component chromosome 11 surface marker 1) (RNA granule protein 105)	74258.3	72428.3	60183		30863.3	109991	57755.5	81026.2	34291
RPS21	Small ribosomal subunit protein eS21 (40S ribosomal protein S21)	275845	270586	303972	835988	236024	285901	240695	231203	343249
DNAJA1	DnaJ homolog subfamily A member 1 (DnaJ protein homolog 2) (HSDJ) (Heat shock 40 kDa protein 4) (Heat shock protein J2) (HSJ-2) (Human DnaJ protein 2) (hDj-2)	255652	256935	325954	311773	341959	470779	399387	508820	503538
FBL	rRNA 2'-O-methyltransferase fibrillarin (EC 2.1.1.-) (34 kDa nucleolar scleroderma antigen) (Histone-glutamine methyltransferase) (U6 snRNA 2'-O-methyltransferase fibrillarin)	49056900	58405900	57894700	43665200	54790200	54657600	49248100	57040800	45755600
LMAN2	Vesicular integral-membrane protein VIP36 (Glycoprotein GP36b) (Lectin mannose-binding 2) (Vesicular integral-membrane protein 36) (VIP36)	709792	691742	842385	1359400	740189	803923	860761	861299	815529
NUDT16L1	Tudor-interacting repair regulator protein (NUDT16-like protein 1) (Protein syndesmos)	80394.6	76506.5	71454	138876	57816.6	79704.2	47712.4	62435.2	72889.9
MAZ	Myc-associated zinc finger protein (MAZI) (Pur-1) (Purine-binding transcription factor) (Serum amyloid A-activating factor-1) (SAF-1) (Transcription factor Zif87) (ZF87) (Zinc finger protein 801)	75521.3	145308	54193.1	99035.9	120814	53452.5	128963	76577.1	94985.6
PNP	Purine nucleoside phosphorylase (PNP) (EC 2.4.2.1) (Inosine phosphorylase) (Inosine-guanosine phosphorylase)	208534	146773	137190	4789550	143087	141540	135903	153508	253291
MRPL22	Large ribosomal subunit protein uL22m (39S ribosomal protein L22, mitochondrial) (L22mt) (MRP-L22) (39S ribosomal protein L25, mitochondrial) (L25mt) (MRP-L25)		93958	138962		95666.6	97271.3	106657	176025	125016
UBE2I	SUMO-conjugating enzyme UBC9 (EC 2.3.2.-) (RING-type E3 SUMO transferase UBC9) (SUMO-protein ligase) (Ubiquitin carrier protein 9) (Ubiquitin carrier protein I) (Ubiquitin-conjugating enzyme E2 I) (Ubiquitin-protein ligase I) (p18)	80322.3	288195	244818	316868	299138	680656	821726	268019	347546
TMEM263	Transmembrane protein 263	201814	107325	100473	126186	140295	168917	164892	184491	342532
ELOVL5	#N/A		91230.5	93367.4			71565.9	92948.6	115717
METTL3	#N/A	26515.2	34779.5	32679.8		50832.9	38669.7	51587.7	38510.8	48341.1
PTCD2	#N/A	180215	98137.8	224723	188173	163049	249874	271362	255371	261665
INPP5F	#N/A		28517.7	56392.1		50266.2	39398.8	51728.8	43786.1	50281.6
HP	Haptoglobin (Zonulin) [Cleaved into: Haptoglobin alpha chain; Haptoglobin beta chain]	12150400	7321320	6657680	10922800	7574620	7348870	6899340	6128210	7314590
YY1	Transcriptional repressor protein YY1 (Delta transcription factor) (INO80 complex subunit S) (NF-E1) (Yin and yang 1) (YY-1)	432688	473644	491134	278372	435023	408465	468003	412632	472804
IDH3G	Isocitrate dehydrogenase [NAD] subunit gamma, mitochondrial (Isocitric dehydrogenase subunit gamma) (NAD(+)-specific ICDH subunit gamma)	201415	282324	272774	186348	251258	334188	323194	340220	366191
KRT9	Keratin, type I cytoskeletal 9 (Cytokeratin-9) (CK-9) (Keratin-9) (K9)	185570000	313829000	96350400	4410890000	188409000	136709000	213344000	161408000	636964000
KIF13B	#N/A		25687.4		35766		18040.2	31895.3	44319.9	46120.2
VDAC2	Voltage-dependent anion-selective channel protein 2 (VDAC-2) (hVDAC2) (Outer mitochondrial membrane protein porin 2)	3514800	3975120	5050150	6748620	4464980	5084400	6195220	6428300	6299450
RPS29	Small ribosomal subunit protein uS14 (40S ribosomal protein S29)	671510	355336	175872	258136	185440	304851	270149	279438	245334
PARN	Poly(A)-specific ribonuclease PARN (EC 3.1.13.4) (Deadenylating nuclease) (Deadenylation nuclease) (Polyadenylate-specific ribonuclease)	106527	74147.9	93501.8	71911.2	130413	92243.4	95070	86228.5	83323.4
XRCC6	X-ray repair cross-complementing protein 6 (EC 3.6.4.-) (EC 4.2.99.-) (5'-deoxyribose-5-phosphate lyase Ku70) (5'-dRP lyase Ku70) (70 kDa subunit of Ku antigen) (ATP-dependent DNA helicase 2 subunit 1) (ATP-dependent DNA helicase II 70 kDa subunit) (CTC box-binding factor 75 kDa subunit) (CTC75) (CTCBF) (DNA repair protein XRCC6) (Lupus Ku autoantigen protein p70) (Ku70) (Thyroid-lupus autoantige…	506833	350984	288115	485792	219171	338936	330350	271287	322588
STK38	Serine/threonine-protein kinase 38 (EC 2.7.11.1) (NDR1 protein kinase) (Nuclear Dbf2-related kinase 1)	46394.6	64373.2	71866.5	77904.6	60433	82041.6	116238	80853.6	87837.9
AURKB	Aurora kinase B (EC 2.7.11.1) (Aurora 1) (Aurora- and IPL1-like midbody-associated protein 1) (AIM-1) (Aurora/IPL1-related kinase 2) (ARK-2) (Aurora-related kinase 2) (STK-1) (Serine/threonine-protein kinase 12) (Serine/threonine-protein kinase 5) (Serine/threonine-protein kinase aurora-B)	1104000	1129590	1133900	1131130	1288130	962568	916299	1016170	1033480
PSMD8	26S proteasome non-ATPase regulatory subunit 8 (26S proteasome regulatory subunit RPN12) (26S proteasome regulatory subunit S14) (p31)	149048	74844	72354.7	147066	30753.9	92672.7	119188	76623	64121.9
LONP2	Lon protease homolog 2, peroxisomal (EC 3.4.21.53) (Lon protease-like protein 2) (Lon protease 2) (Peroxisomal Lon protease) (pLon)	31367.8	53623.7	50232.3	111848	41442.9	53071.2	76376.2	80657.8	76681.3
DDX42	ATP-dependent RNA helicase DDX42 (EC 3.6.4.13) (DEAD box protein 42) (RNA helicase-like protein) (RHELP) (RNA helicase-related protein) (RNAHP) (SF3b DEAD box protein) (Splicing factor 3B-associated 125 kDa protein) (SF3b125)	629480	592342	634285	431565	535110	372402	443742	380210	409252
EXOSC2	Exosome complex component RRP4 (Exosome component 2) (Ribosomal RNA-processing protein 4)	566015	649023	678264	763180	647541	653892	657528	669709	760077
ODR4	Protein odr-4 homolog (hODR-4) (LAG1-interacting protein) (Transactivated by transforming growth factor beta protein 1)	110044	128458	121680	117836	139883	101006	123851	158766	115653
NT5C2	Cytosolic purine 5'-nucleotidase (EC 3.1.3.5) (EC 3.1.3.99) (Cytosolic 5'-nucleotidase II) (cN-II) (Cytosolic IMP/GMP-specific 5'-nucleotidase) (Cytosolic nucleoside phosphotransferase 5'N) (EC 2.7.1.77) (High Km 5'-nucleotidase)	86940.7	96568.7	64045.8	153159	75814.4	61785.7	99262	71769.7	75573.6
CTSB	Cathepsin B (EC 3.4.22.1) (APP secretase) (APPS) (Cathepsin B1) [Cleaved into: Cathepsin B light chain; Cathepsin B heavy chain]	202819	146464	140635	455154	132819	183131	164971	116010	152531
HEATR3	#N/A			22462.7	76865	23620.7
C5	Complement C5 (C3 and PZP-like alpha-2-macroglobulin domain-containing protein 4) [Cleaved into: Complement C5 beta chain; Complement C5 alpha chain; C5a anaphylatoxin; Complement C5 alpha' chain]	1329810	948320	788694	1344500	797375	911318	877221	790368	962085
SIMC1	#N/A					9062.34	35131.7	53444.3	27781.2	55096.3
BPTF	Nucleosome-remodeling factor subunit BPTF (Bromodomain and PHD finger-containing transcription factor) (Fetal Alz-50 clone 1 protein) (Fetal Alzheimer antigen)	515097	2440070	2260500	1537540	1933600	1185270	1012370	1082480	1179190
SPG21	Maspardin (Acid cluster protein 33) (Spastic paraplegia 21 autosomal recessive Mast syndrome protein) (Spastic paraplegia 21 protein)	45458.8	52972.9	41333.4	65389	58537.7	44087.1	53981.6	83863.7	61137.3
CAPZA2	F-actin-capping protein subunit alpha-2 (CapZ alpha-2)	4001450	3623580	4391030	8403810	4080380	4452370	4253830	4635730	5249300
NAA25	N-alpha-acetyltransferase 25, NatB auxiliary subunit (Mitochondrial distribution and morphology protein 20) (N-terminal acetyltransferase B complex subunit MDM20) (NatB complex subunit MDM20) (N-terminal acetyltransferase B complex subunit NAA25) (p120)	195939	196569	186364	136717	118696	170474	195928	233059	175904
TOPORS	E3 ubiquitin-protein ligase Topors (EC 2.3.2.27) (RING-type E3 ubiquitin transferase Topors) (SUMO1-protein E3 ligase Topors) (Topoisomerase I-binding RING finger protein) (Topoisomerase I-binding arginine/serine-rich protein) (Tumor suppressor p53-binding protein 3) (p53-binding protein 3) (p53BP3)	60704.5	849239	1162920	565722	673334	941421	884224	778540	710203
ARIH1	E3 ubiquitin-protein ligase ARIH1 (EC 2.3.2.31) (H7-AP2) (HHARI) (Monocyte protein 6) (MOP-6) (Protein ariadne-1 homolog) (ARI-1) (UbcH7-binding protein) (UbcM4-interacting protein) (Ubiquitin-conjugating enzyme E2-binding protein 1)	285976	311366	311270	324020	374799	317717	306414	362231	384197
HSP90B1	Endoplasmin (94 kDa glucose-regulated protein) (GRP-94) (Heat shock protein 90 kDa beta member 1) (Tumor rejection antigen 1) (gp96 homolog)	1020690	1036210	899210	1212350	846143	890914	904723	719437	882205
KDM1A	Lysine-specific histone demethylase 1A (EC 1.14.99.66) (BRAF35-HDAC complex protein BHC110) (Flavin-containing amine oxidase domain-containing protein 2) ([histone H3]-dimethyl-L-lysine(4) FAD-dependent demethylase 1A)	560826	611092	629298	484264	569579	505735	486155	499256	551921
PPIL3	Peptidyl-prolyl cis-trans isomerase-like 3 (PPIase) (EC 5.2.1.8) (Cyclophilin J) (CyPJ) (Cyclophilin-like protein PPIL3) (Rotamase PPIL3)	46727.4	64878.7	71092.5	48211.4	58936.9	44281.5	61295.2	70736.4	79335.8
AIMP2	#N/A	193607	112613	117309	85139.9	103998	159937	142414	145351	134486
PAPSS1	Bifunctional 3'-phosphoadenosine 5'-phosphosulfate synthase 1 (PAPS synthase 1) (PAPSS 1) (Sulfurylase kinase 1) (SK 1) (SK1) [Includes: Sulfate adenylyltransferase (EC 2.7.7.4) (ATP-sulfurylase) (Sulfate adenylate transferase) (SAT); Adenylyl-sulfate kinase (EC 2.7.1.25) (3'-phosphoadenosine-5'-phosphosulfate synthase) (APS kinase) (Adenosine-5'-phosphosulfate 3'-phosphotransferase) (Adenylylsul…	34779.1	50249.8	46243	26961.9		76726.3	60781.4	43245.4	48292.4
CPNE3	Copine-3 (Copine III)	1229470	694122	730543	2769740	671607	747508	921729	1089370	1247600
CPNE1	Copine-1 (Chromobindin 17) (Copine I)	629974	539042	588781	729903	567342	721623	717065	902900	891236
DENND10;DENND10P1	Putative DENN domain-containing protein 10 B (DENND10 pseudogene 1) (Putative protein FAM45B)		16786.5	48249.7	114551	68173.4	49460.5	55914.3	79941.1	61312.7
ARG1	Arginase-1 (EC 3.5.3.1) (Liver-type arginase) (Type I arginase)	1683000	1468270	1190990	44773800	1240520	1255750	1447720	1361110	2901490
KDM4C	Lysine-specific demethylase 4C (EC 1.14.11.66) (Gene amplified in squamous cell carcinoma 1 protein) (GASC-1 protein) (JmjC domain-containing histone demethylation protein 3C) (Jumonji domain-containing protein 2C) ([histone H3]-trimethyl-L-lysine(9) demethylase 4C)	107345	125523	172632	128541	119631	100588	59534.6	118123	44162.2
PPA1	#N/A	81043.5			85851.4		48424.9	46250.2		37381.5
SRBD1	S1 RNA-binding domain-containing protein 1	360150	506955	479961	375294	451910	534918	577075	589731	584166
CUL4B	Cullin-4B (CUL-4B)	516294	444597	503945	374744	484881	428680	441466	414528	399052
RTCB	RNA-splicing ligase RtcB homolog (EC 6.5.1.8) (3'-phosphate/5'-hydroxy nucleic acid ligase)	1184640	1471710	1376870	1215300	1499960	1347570	1390040	1356300	1360550
BRIX1	Ribosome biogenesis protein BRX1 homolog (Brix domain-containing protein 2)	3679160	5750800	5775170	4452090	5058610	5254830	4443540	5014660	4220550
TMED9	Transmembrane emp24 domain-containing protein 9 (GMP25) (Glycoprotein 25L2) (p24 family protein alpha-2) (p24alpha2) (p25)	121522	105999	106534	744817	89473.5	81161.2	114062	108386	147321
ANKRD52	Serine/threonine-protein phosphatase 6 regulatory ankyrin repeat subunit C (PP6-ARS-C) (Serine/threonine-protein phosphatase 6 regulatory subunit ARS-C) (Ankyrin repeat domain-containing protein 52)	290294	272477	314233	196273	369260	318666	424847	379688	428963
SDAD1	Protein SDA1 homolog (Nucleolar protein 130) (SDA1 domain-containing protein 1) (hSDA)	262031	273115	209352	161984	167260	244397	200603	159794	105987
PWWP2A	PWWP domain-containing protein 2A		40962.1	55229.7	38728.8	44012.5	39193.4	27872.7	23281.3	27480.8
WDR11	WD repeat-containing protein 11 (Bromodomain and WD repeat-containing protein 2) (WD repeat-containing protein 15)	45465.8	66618.1	68367.7	51560.4	73904.9	52986	76346	71859.3	78122.8
DENND4A	C-myc promoter-binding protein (DENN domain-containing protein 4A)		15348	28003.2		33891	31801	29765.3	43074.5	30894.9
MAN2A1	Alpha-mannosidase 2 (EC 3.2.1.114) (Golgi alpha-mannosidase II) (AMan II) (Man II) (Mannosidase alpha class 2A member 1) (Mannosyl-oligosaccharide 1,3-1,6-alpha-mannosidase)	87875.9	88564.1	126194	114000	118289	117125	80448.3	129433	130375
UBE2N	Ubiquitin-conjugating enzyme E2 N (EC 2.3.2.23) (Bendless-like ubiquitin-conjugating enzyme) (E2 ubiquitin-conjugating enzyme N) (Ubc13) (UbcH13) (Ubiquitin carrier protein N) (Ubiquitin-protein ligase N)	233244	187988	123452	195280	108795	168897	111536	148166	161771
ERP44	Endoplasmic reticulum resident protein 44 (ER protein 44) (ERp44) (Thioredoxin domain-containing protein 4)	1211590	1215340	1264510	2232480	1144410	1127100	927978	916740	1282170
GON4L	#N/A		148878	124400				121027	136256	135105
GTPBP3	tRNA modification GTPase GTPBP3, mitochondrial (GTP-binding protein 3) (Mitochondrial GTP-binding protein 1)	1205520	1407490	636021	1021370	1219450	1011460	992051	1041920	930705
SETD5	#N/A		1284470	1582110	1171190	1236460	4811450	3659980	5069210	6812640
HSD17B10	3-hydroxyacyl-CoA dehydrogenase type-2 (EC 1.1.1.35) (17-beta-estradiol 17-dehydrogenase) (EC 1.1.1.62) (2-methyl-3-hydroxybutyryl-CoA dehydrogenase) (MHBD) (3-alpha-(17-beta)-hydroxysteroid dehydrogenase (NAD(+))) (EC 1.1.1.239) (3-hydroxy-2-methylbutyryl-CoA dehydrogenase) (EC 1.1.1.178) (3-hydroxyacyl-CoA dehydrogenase type II) (3alpha(or 20beta)-hydroxysteroid dehydrogenase) (EC 1.1.1.53) (7-…	249221	195757	218648	210200	191520	270969	268509	247181	220486
NOP2	Probable 28S rRNA (cytosine(4447)-C(5))-methyltransferase (EC 2.1.1.-) (Nucleolar protein 1) (Nucleolar protein 2 homolog) (Proliferating-cell nucleolar antigen p120) (Proliferation-associated nucleolar protein p120)	5798430	6440540	6671860	5573770	6127850	5818620	5640300	5527010	5186970
AARSD1	Alanyl-tRNA synthetase domain containing 1	50740	68828.5	79170.1	67709.9	92390.6	103656	111555	146966	163018
KCMF1	E3 ubiquitin-protein ligase KCMF1 (EC 2.3.2.27) (FGF-induced in gastric cancer) (Potassium channel modulatory factor) (PCMF) (RING-type E3 ubiquitin transferase KCMF1) (ZZ-type zinc finger-containing protein 1)	71880.8	121512	118267	111790	121115	135135	140261	182135	156463
SMAP2	Stromal membrane-associated protein 2 (Stromal membrane-associated protein 1-like)	552785	481897	661345	414832	661747	819810	604488	872133	748631
ZCCHC17	Zinc finger CCHC domain-containing protein 17 (Nucleolar protein of 40 kDa) (pNO40) (Pnn-interacting nucleolar protein) (Putative S1 RNA-binding domain protein) (PS1D protein)	104153	153181	126493	55562.1	113503	192308	170580	129032	112690
WDR18	WD repeat-containing protein 18	1042490	451897	976147	808921	933746	1182020	957155	1112070	1150210
NOC2L	#N/A	33425.7	38494.5	60134.6		47931	58061.1	60288	50494.3	29017.5
SHC1	SHC-transforming protein 1 (SHC-transforming protein 3) (SHC-transforming protein A) (Src homology 2 domain-containing-transforming protein C1) (SH2 domain protein C1)	111690	111558	87272.5	78661	118571	124526	137998	148167	165103
CKB	Creatine kinase B-type (EC 2.7.3.2) (Brain creatine kinase) (B-CK) (Creatine kinase B chain) (Creatine phosphokinase B-type) (CPK-B)	324692	270756	261841	302796	235491	260417	283522	243370	349293
DPP7	#N/A	25834.6	49537.9		221741		28691.2
GRK6	G protein-coupled receptor kinase 6 (EC 2.7.11.16) (G protein-coupled receptor kinase GRK6)	226303	194735	180513	177561	100788	205755	206533	219318	192157
MAN2B1	#N/A				87465.7
PLEKHO2	#N/A	21255.4		31043.4			50646.7	43538	48157	41952.7
SLC25A12	Electrogenic aspartate/glutamate antiporter SLC25A12, mitochondrial (Araceli hiperlarga) (Aralar) (Aralar1) (Mitochondrial aspartate glutamate carrier 1) (Solute carrier family 25 member 12)	1127060	1227320	1383680	1375200	1237580	1224250	1456480	1801920	1600900
EMC3	ER membrane protein complex subunit 3 (Transmembrane protein 111)	88718.3	104430	65010.7	168144	94648	150463	169375	179667	57130.3
MAP3K20	Mitogen-activated protein kinase kinase kinase 20 (EC 2.7.11.25) (Human cervical cancer suppressor gene 4 protein) (HCCS-4) (Leucine zipper- and sterile alpha motif-containing kinase) (MLK-like mitogen-activated protein triple kinase) (Mitogen-activated protein kinase kinase kinase MLT) (Mixed lineage kinase 7) (Mixed lineage kinase-related kinase) (MLK-related kinase) (MRK) (Sterile alpha motif-…	110312	98089.1	94725.4	126868	130245	137762	128962	126468	172203
MRPS22	#N/A	49157.8					72574.4	42471.7	49171.4
POLR2C	DNA-directed RNA polymerase II subunit RPB3 (RNA polymerase II subunit 3) (RNA polymerase II subunit B3) (DNA-directed RNA polymerase II 33 kDa polypeptide) (RPB33) (DNA-directed RNA polymerase II subunit C) (RPB31)	50930.7	82344.4	75743.2		90399.6	84161.1	71314.3	73209.2	96587.3
HNRNPAB	Heterogeneous nuclear ribonucleoprotein A/B (hnRNP A/B) (APOBEC1-binding protein 1) (ABBP-1)	27514800	22241400	23169600	21130700	23470800	18834100	17384700	15335700	16406800
GRK2	Beta-adrenergic receptor kinase 1 (Beta-ARK-1) (EC 2.7.11.15) (G-protein coupled receptor kinase 2)	614919	610961	611528	447984	720514	687083	749150	888695	911556
CDK4	#N/A	141447	80106.2	104027	75872.6	84748.1	159021	152789	189924	163360
RPS6KA4	Ribosomal protein S6 kinase alpha-4 (S6K-alpha-4) (EC 2.7.11.1) (90 kDa ribosomal protein S6 kinase 4) (Nuclear mitogen- and stress-activated protein kinase 2) (Ribosomal protein kinase B) (RSKB)	43764.7	106058	97894.8	67003.8	85542.2	151933	183330	81675	90015.1
CDK17	Cyclin-dependent kinase 17 (EC 2.7.11.22) (Cell division protein kinase 17) (PCTAIRE-motif protein kinase 2) (Serine/threonine-protein kinase PCTAIRE-2)	51472	80121.4	77624.6	42900.5	68676.8	100401	82454	78035.6	56001.5
CDK18	Cyclin-dependent kinase 18 (EC 2.7.11.22) (Cell division protein kinase 18) (PCTAIRE-motif protein kinase 3) (Serine/threonine-protein kinase PCTAIRE-3)	73202.8	106638	86382.5	126786	92402.8	81743.9	54571.1	93270.4	116856
CDK5	Cyclin-dependent kinase 5 (EC 2.7.11.1) (Cell division protein kinase 5) (Cyclin-dependent-like kinase 5) (Serine/threonine-protein kinase PSSALRE) (Tau protein kinase II catalytic subunit) (TPKII catalytic subunit)	65497.7	81370	131903		126564	116070	75645.2	139146	138027
RPS27L	Ribosomal protein eS27-like (40S ribosomal protein S27-like) (Small ribosomal subunit protein eS27-like)	317046	346951	464241	371781	428394	382097	470045	418232	365121
RPS27	Small ribosomal subunit protein eS27 (40S ribosomal protein S27) (Metallopan-stimulin 1) (MPS-1)	3904750	3931830	4714980	3513010	4006520	5055200	5020750	5133930	4660630
MTARC1	Mitochondrial amidoxime-reducing component 1 (mARC1) (EC 1.7.-.-) (Molybdenum cofactor sulfurase C-terminal domain-containing protein 1) (MOSC domain-containing protein 1) (Moco sulfurase C-terminal domain-containing protein 1)	34366.4	119296	241632		135041	197579	217630	166147	124027
ANXA7	Annexin A7 (Annexin VII) (Annexin-7) (Synexin)	384961	343149	290036	1379450	314241	364326	329867	327864	397193
TMED10	Transmembrane emp24 domain-containing protein 10 (Protein TMED10) (21 kDa transmembrane-trafficking protein) (S31I125) (S31III125) (Tmp-21-I) (Transmembrane protein Tmp21) (p23) (p24 family protein delta-1) (p24delta1) (p24delta)	258703	225668	267686	613214	149604	170739	215321	253408	214383
AIDA	#N/A		60869.5	88858.4		71427.6	81686.2	73823	41426.2
CYP51A1	Lanosterol 14-alpha demethylase (LDM) (EC 1.14.14.154) (CYPLI) (Cytochrome P450 51A1) (CYP51A1) (Cytochrome P450-14DM) (Cytochrome P45014DM) (Cytochrome P450LI) (Sterol 14-alpha demethylase)	162420	202496	193216	162147	146136	161593	195242	227831	231910
ATP6V0A1	V-type proton ATPase 116 kDa subunit a 1 (V-ATPase 116 kDa subunit a 1) (Clathrin-coated vesicle/synaptic vesicle proton pump 116 kDa subunit) (Vacuolar adenosine triphosphatase subunit Ac116) (Vacuolar proton pump subunit 1) (Vacuolar proton translocating ATPase 116 kDa subunit a isoform 1)	209835	201580	346820	709211	249483	325803	364911	297451	345133
FBRS	Fibrosin		256464	172863	133370	290611	183154	139454	196954	237866
	Probable fibrosin-1		294363	213519	159750	275164	223479	184039	293305	250280
CLP1	Polyribonucleotide 5'-hydroxyl-kinase Clp1 (EC 2.7.1.78) (Polyadenylation factor Clp1) (Polynucleotide kinase Clp1) (Pre-mRNA cleavage complex II protein Clp1)	696766	711490	588635	669904	684149	704144	691197	632077	586612
ARL8B	ADP-ribosylation factor-like protein 8B (EC 3.6.5.2) (ADP-ribosylation factor-like protein 10C) (Novel small G protein indispensable for equal chromosome segregation 1)	535681	490899	525152	796401	350190	580937	510630	637360	536949
TREX1	#N/A	174267	209518	190389		221881	223774	161567	173311	226639
PSMD13	26S proteasome non-ATPase regulatory subunit 13 (26S proteasome regulatory subunit RPN9) (26S proteasome regulatory subunit S11) (26S proteasome regulatory subunit p40.5)	343826	370909	316459	330338	331220	399253	469599	420973	408529
CCDC57	#N/A	141399	198994	165629	131429	179863	181655	148414	154424	175953
SUN1	SUN domain-containing protein 1 (Protein unc-84 homolog A) (Sad1/unc-84 protein-like 1)	52767.2	124576	81613.8		117764	262655	252446	299782	338395
S100A9	Protein S100-A9 (Calgranulin-B) (Calprotectin L1H subunit) (Leukocyte L1 complex heavy chain) (Migration inhibitory factor-related protein 14) (MRP-14) (p14) (S100 calcium-binding protein A9)	3190860	1981150	1854070	2947120	1664160	2016850	1784440	1761770	2022760
GAS8	Dynein regulatory complex subunit 4 (Growth arrest-specific protein 11) (GAS-11) (Growth arrest-specific protein 8) (GAS-8)	119963	572605	492507	745077	483961	1171420	1056110	1226150	1385000
PRDX3	Thioredoxin-dependent peroxide reductase, mitochondrial (EC 1.11.1.24) (Antioxidant protein 1) (AOP-1) (HBC189) (Peroxiredoxin III) (Prx-III) (Peroxiredoxin-3) (Protein MER5 homolog) (Thioredoxin-dependent peroxiredoxin 3)	212875	297710	306090	425482	305828	241373	311566	271592	313568
NOC3L	Nucleolar complex protein 3 homolog (NOC3 protein homolog) (Factor for adipocyte differentiation 24) (NOC3-like protein) (Nucleolar complex-associated protein 3-like protein)	170567	223128	222881	145421	203037	209704	185750	182660	166108
TC2N	Tandem C2 domains nuclear protein (Membrane targeting tandem C2 domain-containing protein 1) (Tandem C2 protein in nucleus) (Tac2-N)	208089	92186.8	154917	104077	133982	136492	114914	157788	131055
FIG4	#N/A		112824	105702		106402	110704	103385	111511	91231.9
SART3	Squamous cell carcinoma antigen recognized by T-cells 3 (SART-3) (Tat-interacting protein of 110 kDa) (Tip110) (p110 nuclear RNA-binding protein)	414348	418351	351878	426437	456106	487405	432639	529650	477546
ACTG2	Actin, gamma-enteric smooth muscle (EC 3.6.4.-) (Alpha-actin-3) (Gamma-2-actin) (Smooth muscle gamma-actin) [Cleaved into: Actin, gamma-enteric smooth muscle, intermediate form]	69478.3	86352.2	133492	133872	109974	168263	125896	93066.7	155954
ACTA1	Actin, alpha skeletal muscle (EC 3.6.4.-) (Alpha-actin-1) [Cleaved into: Actin, alpha skeletal muscle, intermediate form]	3207230	3941490	4351160	5730910	3674190	4698460	5502620	4459530	5589070
HNRNPR	Heterogeneous nuclear ribonucleoprotein R (hnRNP R)	8463120	6243830	6711340	5966210	6604200	5950040	5478440	5319410	4796630
SMARCD1	SWI/SNF-related matrix-associated actin-dependent regulator of chromatin subfamily D member 1 (60 kDa BRG-1/Brm-associated factor subunit A) (BRG1-associated factor 60A) (BAF60A) (SWI/SNF complex 60 kDa subunit)	276704	374005	387786	342307	378608	330862	315151	294011	343905
CBX8	Chromobox protein homolog 8 (Polycomb 3 homolog) (Pc3) (hPc3) (Rectachrome 1)		128179	86575.9	147040	116026	102536	124950	99025	92653.8
ZNF746	Zinc finger protein 746 (Parkin-interacting substrate) (PARIS)		209229	204652	224404	180372	154852	125581	102808	123653
AMBRA1	Activating molecule in BECN1-regulated autophagy protein 1 (DDB1- and CUL4-associated factor 3)	29261.2	101125	80438.1	200294	135053	98943.7	113277	126014	131892
SNRNP70	U1 small nuclear ribonucleoprotein 70 kDa (U1 snRNP 70 kDa) (U1-70K) (snRNP70)	8987530	6281480	6592730	4874130	5856230	5058790	5156430	5247050	4927450
RPS15	Small ribosomal subunit protein uS19 (40S ribosomal protein S15) (RIG protein)	631123	523429	593169	240875	586441	767321	890880	833695	713364
EIF3D	Eukaryotic translation initiation factor 3 subunit D (eIF3d) (Eukaryotic translation initiation factor 3 subunit 7) (eIF-3-zeta) (eIF3 p66)	751388	894977	927644	673551	949784	992170	1044030	1121900	962965
EEF1A2	Elongation factor 1-alpha 2 (EF-1-alpha-2) (Eukaryotic elongation factor 1 A-2) (eEF1A-2) (Statin-S1)	160695	123240	130799	102117	102759	119733	110798	124848	128859
EIF3I	Eukaryotic translation initiation factor 3 subunit I (eIF3i) (Eukaryotic translation initiation factor 3 subunit 2) (TGF-beta receptor-interacting protein 1) (TRIP-1) (eIF-3-beta) (eIF3 p36)	839427	804934	834483	823493	829960	1075460	1026300	936452	1180320
OGDH	2-oxoglutarate dehydrogenase complex component E1 (E1o) (OGDC-E1) (OGDH-E1) (EC 1.2.4.2) (2-oxoglutarate dehydrogenase, mitochondrial) (Alpha-ketoglutarate dehydrogenase) (Alpha-KGDH-E1) (Thiamine diphosphate (ThDP)-dependent 2-oxoglutarate dehydrogenase)	772477	834898	1134190	977837	819464	868141	872270	1007960	799250
THAP12	52 kDa repressor of the inhibitor of the protein kinase (p52rIPK) (58 kDa interferon-induced protein kinase-interacting protein) (p58IPK-interacting protein) (Death-associated protein 4) (THAP domain-containing protein 0) (THAP domain-containing protein 12)	37525.6	51140	49258.6	60781.2	55971.5	55261.4	59344	50944.1	55891.3
PIP4K2A	Phosphatidylinositol 5-phosphate 4-kinase type-2 alpha (EC 2.7.1.149) (1-phosphatidylinositol 5-phosphate 4-kinase 2-alpha) (Diphosphoinositide kinase 2-alpha) (PIP5KIII) (Phosphatidylinositol 5-Phosphate 4-Kinase) (PI5P4Kalpha) (Phosphatidylinositol 5-phosphate 4-kinase type II alpha) (PI(5)P 4-kinase type II alpha) (PIP4KII-alpha) (PtdIns(4)P-5-kinase B isoform) (PtdIns(4)P-5-kinase C isoform) …	89894.4	116080	132515	137826	95711.4	191179	176722	127292	145841
SUPT5H	Transcription elongation factor SPT5 (hSPT5) (DRB sensitivity-inducing factor 160 kDa subunit) (DSIF p160) (DRB sensitivity-inducing factor large subunit) (DSIF large subunit) (Tat-cotransactivator 1 protein) (Tat-CT1 protein)	1097610	1460730	1457380	1175570	1372770	1085340	1133040	912144	1101490
DPYSL4	Dihydropyrimidinase-related protein 4 (DRP-4) (Collapsin response mediator protein 3) (CRMP-3) (UNC33-like phosphoprotein 4) (ULIP-4)	88950	62750.6	57719.8	80400.4	41747.1	53547	57676.5	40972.2	70226.8
DDX6	Probable ATP-dependent RNA helicase DDX6 (EC 3.6.4.13) (ATP-dependent RNA helicase p54) (DEAD box protein 6) (Oncogene RCK)	2230730	2019210	2178730	1616900	1881470	1798220	1842030	2004760	1733040
RCC1	Regulator of chromosome condensation (Cell cycle regulatory protein) (Chromosome condensation protein 1)	7659780	8086870	7319270	6021710	7228380	6383690	6395650	6196030	5918780
RNGTT	mRNA-capping enzyme (HCAP1) (HCE) [Includes: mRNA 5'-triphosphate monophosphatase (EC 3.6.1.74) (mRNA 5'-phosphatase); mRNA guanylyltransferase (EC 2.7.7.50) (GTP--RNA guanylyltransferase) (GTase)]	153271	120313	143017	120416	158196	145284	107150	189799	180079
RPS17	Small ribosomal subunit protein eS17 (40S ribosomal protein S17)	250099	194681	192273	211501	136531	309338	267766	269411	280840
FARSA	Phenylalanine--tRNA ligase alpha subunit (EC 6.1.1.20) (CML33) (Phenylalanyl-tRNA synthetase alpha subunit) (PheRS)	334570	412575	348359	352295	351055	381629	431359	391182	350804
CTSD	Cathepsin D (EC 3.4.23.5) [Cleaved into: Cathepsin D light chain; Cathepsin D heavy chain]	1405910	881550	970702	11252500	713634	972063	1012380	890479	1019540
KAT2A	Histone acetyltransferase KAT2A (EC 2.3.1.48) (General control of amino acid synthesis protein 5-like 2) (Histone acetyltransferase GCN5) (hGCN5) (Histone glutaryltransferase KAT2A) (EC 2.3.1.-) (Histone succinyltransferase KAT2A) (EC 2.3.1.-) (Lysine acetyltransferase 2A) (STAF97)	182533	205056	183210		250751	255009	239962	152644	180426
POLR1F	DNA-directed RNA polymerase I subunit RPA43 (DNA-directed RNA polymerase I subunit F) (Twist neighbor protein)	446598	472926	394765	289384	475424	432853	427137	473042	538429
HAX1	#N/A	123292	120505	154740	88934.1	144849	138717	126700	98196.7	126821
CYTH1	Cytohesin-1 (PH, SEC7 and coiled-coil domain-containing protein 1) (SEC7 homolog B2-1)	1167990	1003740	1009450	484385	1298530	982620	993883	1536050	1195020
PDIA4	Protein disulfide-isomerase A4 (EC 5.3.4.1) (Endoplasmic reticulum resident protein 70) (ER protein 70) (ERp70) (Endoplasmic reticulum resident protein 72) (ER protein 72) (ERp-72) (ERp72)	162730	105678	85038.9	156477	66548	91615	100782	98031.8	118451
SPCS2	Signal peptidase complex subunit 2 (Microsomal signal peptidase 25 kDa subunit) (SPase 25 kDa subunit)	232641	264211	326907	323180	258944	293745	319258	308656	268017
NCOA5	Nuclear receptor coactivator 5 (NCoA-5) (Coactivator independent of AF-2) (CIA)	922978	1072500	943786	763631	1068440	1024850	842845	888778	865840
AKAP8L	A-kinase anchor protein 8-like (AKAP8-like protein) (Helicase A-binding protein 95) (HAP95) (Homologous to AKAP95 protein) (HA95) (Neighbor of A-kinase-anchoring protein 95) (Neighbor of AKAP95)	917274	595644	671461	548279	716864	752196	706893	642313	777380
PAICS	Bifunctional phosphoribosylaminoimidazole carboxylase/phosphoribosylaminoimidazole succinocarboxamide synthetase (PAICS) [Includes: Phosphoribosylaminoimidazole carboxylase (EC 4.1.1.21) (AIR carboxylase) (AIRC); Phosphoribosylaminoimidazole succinocarboxamide synthetase (EC 6.3.2.6) (SAICAR synthetase)]	462702	383225	361296	916434	376768	406205	443199	440463	433015
ESCO2	N-acetyltransferase ESCO2 (EC 2.3.1.-) (Establishment factor-like protein 2) (EFO2) (EFO2p) (hEFO2) (Establishment of cohesion 1 homolog 2) (ECO1 homolog 2)	121479	271607	232162	189436	239746	204615	247294	263974	235306
LDHA	L-lactate dehydrogenase A chain (LDH-A) (EC 1.1.1.27) (Cell proliferation-inducing gene 19 protein) (LDH muscle subunit) (LDH-M) (Renal carcinoma antigen NY-REN-59)	4763420	3210410	3130820	8954870	2860250	3108000	3059350	3347490	5407900
ABHD12	Lysophosphatidylserine lipase ABHD12 (EC 3.1.-.-) (2-arachidonoylglycerol hydrolase ABHD12) (Abhydrolase domain-containing protein 12) (hABHD12) (Monoacylglycerol lipase ABHD12) (EC 3.1.1.23) (Oxidized phosphatidylserine lipase ABHD12) (EC 3.1.-.-)	74256	80127.6	42659.2	145301	56914.9	87618.5	111345	87923.2	76966.7
CIR1	Corepressor interacting with RBPJ 1 (CBF1-interacting corepressor) (Recepin)	226886	166645	143786	155187	171307	168516	146535	130462	82092.8
BABAM2	BRISC and BRCA1-A complex member 2 (BRCA1-A complex subunit BRE) (BRCA1/BRCA2-containing complex subunit 45) (Brain and reproductive organ-expressed protein)			22065.4	24266.3				23117.9
ANAPC2	Anaphase-promoting complex subunit 2 (APC2) (Cyclosome subunit 2)		76843.8	89622.4		75953.1	75584.4	106273	67435.7	82101.3
PRR14	Proline-rich protein 14		50389.3	36301.2	821365	66979	22594.3	78474.1	60448.8	72397
RRAS2	Ras-related protein R-Ras2 (EC 3.6.5.-) (Ras-like protein TC21) (Teratocarcinoma oncogene)	288882	328470	531036	433479	403834	443164	478830	443898	372140
SNRPA1	U2 small nuclear ribonucleoprotein A' (U2 snRNP A')	1149410	1123760	1114020	919400	1049220	1125310	1049290	1014630	984412
PIP4K2C	#N/A		86594.5	79327.8	120768	60877	115466	103793		92810.8
DDOST	Dolichyl-diphosphooligosaccharide--protein glycosyltransferase 48 kDa subunit (DDOST 48 kDa subunit) (Oligosaccharyl transferase 48 kDa subunit)	1274460	1553820	1734790	2989040	1553450	1687150	1601250	1578840	1574330
SENP3	Sentrin-specific protease 3 (EC 3.4.22.-) (SUMO-1-specific protease 3) (Sentrin/SUMO-specific protease SENP3)	1266970	1428630	1294430	1064410	1445920	1407130	1424000	1485800	1460050
UHRF1	E3 ubiquitin-protein ligase UHRF1 (EC 2.3.2.27) (Inverted CCAAT box-binding protein of 90 kDa) (Nuclear protein 95) (Nuclear zinc finger protein Np95) (HuNp95) (hNp95) (RING finger protein 106) (RING-type E3 ubiquitin transferase UHRF1) (Transcription factor ICBP90) (Ubiquitin-like PHD and RING finger domain-containing protein 1) (hUHRF1) (Ubiquitin-like-containing PHD and RING finger domains pro…	1706630	2384020	2529430	2072830	2698260	1707680	1617480	1536870	1670660
NME1	Nucleoside diphosphate kinase A (NDK A) (NDP kinase A) (EC 2.7.4.6) (Granzyme A-activated DNase) (GAAD) (Metastasis inhibition factor nm23) (NM23-H1) (Tumor metastatic process-associated protein)	1033890	772489	914979	3324140	498482	708123	722690	590752	774922
PIK3C2B	Phosphatidylinositol 4-phosphate 3-kinase C2 domain-containing subunit beta (PI3K-C2-beta) (PtdIns-3-kinase C2 subunit beta) (EC 2.7.1.137) (EC 2.7.1.154) (C2-PI3K) (Phosphoinositide 3-kinase-C2-beta)	25912.4	25074.7	24950.2	22582	23292.6	19155.1	23048.7	30691.2	36780.9
SF3B4	Splicing factor 3B subunit 4 (Pre-mRNA-splicing factor SF3b 49 kDa subunit) (Spliceosome-associated protein 49) (SAP 49)	108922	36717.6	100633	80221.4	85015.4	116233	95508	78617.1	91738.9
ACOX1	#N/A				41372
KLF13	Krueppel-like factor 13 (Basic transcription element-binding protein 3) (BTE-binding protein 3) (Novel Sp1-like zinc finger transcription factor 1) (RANTES factor of late activated T-lymphocytes 1) (RFLAT-1) (Transcription factor BTEB3) (Transcription factor NSLP1)		38685.2		38615.1	35115.9	41375.6	80163.3	24513.9
MLF2	Myeloid leukemia factor 2 (Myelodysplasia-myeloid leukemia factor 2)	146368	212151	230219	808391	167125	244492	278317	203731	308131
SF3A2	Splicing factor 3A subunit 2 (SF3a66) (Spliceosome-associated protein 62) (SAP 62)	468145	675776	617228	569013	639128	536456	539430	411612	483903
FBLN1	Fibulin-1 (FIBL-1)	896893	566624	444086	779926	354543	470974	601312	439848	504720
MAT2A	S-adenosylmethionine synthase isoform type-2 (AdoMet synthase 2) (EC 2.5.1.6) (Methionine adenosyltransferase 2) (MAT 2) (Methionine adenosyltransferase II) (MAT-II)	321642	378987	400320	480563	400745	495712	557990	536633	528210
SYNE3	Nesprin-3 (KASH domain-containing protein 3) (KASH3) (Nuclear envelope spectrin repeat protein 3)		271469			215314	300068	256992	334811	300320
KMT5B	#N/A	33108.4	52238.3	56050.3	25802.2	48833.7	42491.4	53381.7	47488.4	59126.3
USP24	Ubiquitin carboxyl-terminal hydrolase 24 (EC 3.4.19.12) (Deubiquitinating enzyme 24) (Ubiquitin thioesterase 24) (Ubiquitin-specific-processing protease 24)	210207	172565	204376	174247	247797	223880	224707	277797	281353
ZNF800	Zinc finger protein 800	147096	731241	753897	652060	561862	538275	456625	479155	470933
DERA	#N/A				168230
WDR89	#N/A	148487	221523	234092	126891	186293	189897	154163	151804	186857
TBC1D17	TBC1 domain family member 17	190523	174294	171037	108004	183840	207214	238061	271166	286986
RPL36A	Large ribosomal subunit protein eL42 (60S ribosomal protein L36a) (60S ribosomal protein L44) (Cell growth-inhibiting gene 15 protein) (Cell migration-inducing gene 6 protein)	344518	445783	448409	360514	361388	566120	529582	678276	493358
ZHX2	#N/A		139370	91469.1		87180.9	76591.7	71158.9
SPRYD3	#N/A				122914				119474	167134
XRCC1	#N/A	77379.7	96381.1	82651.9	77011.7	47637.9	74078.3	116153	97870.2	124246
PFN1	Profilin-1 (Epididymis tissue protein Li 184a) (Profilin I)	3750390	2926310	2929850	3474660	2864040	2745110	2538650	2716890	2502870
SHOC2	Leucine-rich repeat protein SHOC-2 (Protein soc-2 homolog) (Protein sur-8 homolog)	72398.7	115987	61664.9	38512.9	88110.7	79135.8	106031	107146	107545
POLR1C	DNA-directed RNA polymerases I and III subunit RPAC1 (DNA-directed RNA polymerase I subunit C) (RNA polymerases I and III subunit AC1) (AC40) (DNA-directed RNA polymerases I and III 40 kDa polypeptide) (RPA40) (RPA39) (RPC40)	524167	550605	561471	400334	573347	688674	627305	706110	801118
VPS18	Vacuolar protein sorting-associated protein 18 homolog (hVPS18)	200370	211161	162267	240080	165808	207793	236141	272455	233535
IGKC	Immunoglobulin kappa constant (Ig kappa chain C region) (Ig kappa chain C region AG) (Ig kappa chain C region CUM) (Ig kappa chain C region EU) (Ig kappa chain C region OU) (Ig kappa chain C region ROY) (Ig kappa chain C region TI)	28449000	19518900	16483900	25027800	16122900	16038800	16070900	16525100	17593300
GTF3C5	General transcription factor 3C polypeptide 5 (TF3C-epsilon) (Transcription factor IIIC 63 kDa subunit) (TFIIIC 63 kDa subunit) (TFIIIC63) (Transcription factor IIIC subunit epsilon)	261072	226693	256926	136882	277298	261673	251618	328892	313676
AEBP2	Zinc finger protein AEBP2 (Adipocyte enhancer-binding protein 2) (AE-binding protein 2)	74897.3	130059	118504	75428.5	34008.9	123844	128785	87747.7	93670.8
CDH1	Cadherin-1 (CAM 120/80) (Epithelial cadherin) (E-cadherin) (Uvomorulin) (CD antigen CD324) [Cleaved into: E-Cad/CTF1; E-Cad/CTF2; E-Cad/CTF3]		44865.2		127812
GPHN	#N/A	38237.3			179112					51804.6
RAP1A	Ras-related protein Rap-1A (EC 3.6.5.2) (C21KG) (G-22K) (GTP-binding protein smg p21A) (Ras-related protein Krev-1)	3135180	2929740	4252090	4598220	2872400	3313740	3651220	3383880	3163790
RAB2A	Ras-related protein Rab-2A (EC 3.6.5.2)	551506	516039	572364	1080360	488694	568997	538503	554004	598573
BRPF1	Peregrin (Bromodomain and PHD finger-containing protein 1) (Protein Br140)	166303	305623	349754	203798	310520	301427	234369	195407	245220
SIRT6	NAD-dependent protein deacylase sirtuin-6 (EC 2.3.1.-) (NAD-dependent protein deacetylase sirtuin-6) (EC 2.3.1.286) (Protein mono-ADP-ribosyltransferase sirtuin-6) (EC 2.4.2.-) (Regulatory protein SIR2 homolog 6) (hSIRT6) (SIR2-like protein 6)	182003	179549	190458	142366	179993	147875	170055	140942	180469
SIRT7	NAD-dependent protein deacetylase sirtuin-7 (EC 2.3.1.286) (NAD-dependent protein deacylase sirtuin-7) (EC 2.3.1.-) (Regulatory protein SIR2 homolog 7) (SIR2-like protein 7)	314739	405437	341561	268008	254677	387937	364312	331502	377499
CREBRF	#N/A	1499510	1212860	851810	845709	1104240	1062310	978066	1377590	1970410
ZNF777	Zinc finger protein 777		827354	813451	817103	844133	496859	483154	429974	444568
HADH	#N/A	86786.6	68822.3	93430.2				51892.3	83162.3
IGHV1-2	Immunoglobulin heavy variable 1-2 (Ig heavy chain V-I region ND) (Ig heavy chain V-I region V35)	986326	673474	624547	1063380	580610	736651	762862	569543	644516
TIA1	Cytotoxic granule associated RNA binding protein TIA1 (Nucleolysin TIA-1 isoform p40) (RNA-binding protein TIA-1) (T-cell-restricted intracellular antigen-1) (TIA-1) (p40-TIA-1)	2426320	2149540	1471950	930911	1294820	1884630	1248920	1656440	1777490
PMPCA	#N/A		81462.2	65404.3		44701.9	63616.2	52193.9	108447	72103.3
ATAD1	Outer mitochondrial transmembrane helix translocase (EC 7.4.2.-) (ATPase family AAA domain-containing protein 1) (hATAD1) (Thorase)	78956	191127	188720	160519	194685	196002	216904	300963	234104
DPM1	Dolichol-phosphate mannosyltransferase subunit 1 (EC 2.4.1.83) (Dolichol-phosphate mannose synthase subunit 1) (DPM synthase subunit 1) (Dolichyl-phosphate beta-D-mannosyltransferase subunit 1) (Mannose-P-dolichol synthase subunit 1) (MPD synthase subunit 1)	359243	364799	361532	433582	292209	455288	399438	370843	414500
ATG7	Ubiquitin-like modifier-activating enzyme ATG7 (ATG12-activating enzyme E1 ATG7) (Autophagy-related protein 7) (APG7-like) (hAGP7) (Ubiquitin-activating enzyme E1-like protein)	66237.3	58642.5	65894.3	71369.3	73175.3	77425.7	71739.6	79628.4	70940.8
POLDIP2	Polymerase delta-interacting protein 2 (38 kDa DNA polymerase delta interaction protein) (p38)	259604	224798	280677	208059	314461	363722	314472	418102	362758
ATP6AP1	V-type proton ATPase subunit S1 (V-ATPase subunit S1) (Protein XAP-3) (V-ATPase Ac45 subunit) (V-ATPase S1 accessory protein) (Vacuolar proton pump subunit S1)	74470.6	48610.6	36303.6	553532	33129	47457.8	42985	39854.2
KRT76	Keratin, type II cytoskeletal 2 oral (Cytokeratin-2P) (CK-2P) (K2P) (Keratin-76) (K76) (Type-II keratin Kb9)	3001420	2005410	1739350	4842670	1419430	2009180	1784740	2105230	2051150
STRN	Striatin	45811	103065	148637		100195	118850	96556.8	108584	66777
MMP15	#N/A	114768		55317.1			69464.1	71246.5	39677
SBDS	Ribosome maturation protein SBDS (Shwachman-Bodian-Diamond syndrome protein)	1361010	1371940	1368210	1009570	1444750	1453260	1347710	1852470	1673540
EPHX1	Epoxide hydrolase 1 (EC 3.3.2.9) (Epoxide hydratase) (Microsomal epoxide hydrolase) (mEH)	297529	89842.3	89591.3	451722	66638.6	112212	77326	54125	81674.4
PDZD8	#N/A	61213.1		67745.8	154948	81345.1	73559.1	97002.4	96254.2	115203
TOMM40L	Mitochondrial import receptor subunit TOM40B (Protein TOMM40-like)	44187.3	72706.1	115936	82784.2	89460.2	88107.4	111195	120474	103049
RPL27	Large ribosomal subunit protein eL27 (60S ribosomal protein L27)	19100600	19305800	19360600	16321400	18671800	19786200	19115100	18672300	16787700
TP53BP1	TP53-binding protein 1 (53BP1) (p53-binding protein 1) (p53BP1)	577360	2014000	1895860	1556200	1763870	1874060	1914040	1529110	1583870
ITPR2	Inositol 1,4,5-trisphosphate receptor type 2 (IP3 receptor isoform 2) (IP3R 2) (InsP3R2) (Type 2 inositol 1,4,5-trisphosphate receptor) (Type 2 InsP3 receptor)		24627.3	39119.6		32678.3	43618.7	27638.5	67781.4	53316.1
RPS12	Small ribosomal subunit protein eS12 (40S ribosomal protein S12)	849546	869302	820488	944839	822024	1428500	1258270	1052370	1243490
TAF5L	#N/A	59562.8	65508.4	71224.7		87238.4	59715	54129.9	76786.2	59798.1
CSNK1D	Casein kinase I isoform delta (CKI-delta) (CKId) (EC 2.7.11.1) (Tau-protein kinase CSNK1D) (EC 2.7.11.26)	246315	298698	313496	291634	275576	249216	289649	258667	265501
[truncated: 1,944 more rows]

## Sheet: Top hit
Top hit
Genes	Protein description	WT/RNF4	RNF4/WT	P avlue
KLHL14	#N/A	0.103885	9.62604	0.0160683
ZNF225	#N/A	0.161102	6.20725	0.00185063
PIAS2	E3 SUMO-protein ligase PIAS2 (EC 2.3.2.-) (Androgen receptor-interacting protein 3) (ARIP3) (DAB2-interacting protein) (DIP) (E3 SUMO-protein transferase PIAS2) (Msx-interacting zinc finger protein) (Miz1) (PIAS-NY protein) (Protein inhibitor of activated STAT x) (Protein inhibitor of activated STAT2)	0.202138	4.94711	0.000151559
STK17B	Serine/threonine-protein kinase 17B (EC 2.7.11.1) (DAP kinase-related apoptosis-inducing protein kinase 2)	0.229075	4.36539	0.0308361
SUN1	SUN domain-containing protein 1 (Protein unc-84 homolog A) (Sad1/unc-84 protein-like 1)	0.234417	4.26591	0.000902752
RASAL3	RAS protein activator like-3	0.239683	4.17217	0.00550566
LPP	Lipoma-preferred partner (LIM domain-containing preferred translocation partner in lipoma)	0.240396	4.15981	0.0328706
SETD5	#N/A	0.259134	3.85901	0.00122368
SMARCA2	Probable global transcription activator SNF2L2 (EC 3.6.4.-) (ATP-dependent helicase SMARCA2) (BRG1-associated factor 190B) (BAF190B) (Protein brahma homolog) (hBRM) (SNF2-alpha) (SWI/SNF-related matrix-associated actin-dependent regulator of chromatin subfamily A member 2)	0.259741	3.84998	0.0184473
DCP1A	mRNA-decapping enzyme 1A (EC 3.6.1.62) (Smad4-interacting transcriptional co-activator) (Transcription factor SMIF)	0.280724	3.56222	0.0450743
UNC119;UNC119B	#N/A	0.282318	3.5421	0.00740533
UBE2S	#N/A	0.289782	3.45087	0.0222167
VPS11	Vacuolar protein sorting-associated protein 11 homolog (hVPS11) (RING finger protein 108)	0.306087	3.26704	0.00879921
NSMCE4A	Non-structural maintenance of chromosomes element 4 homolog A (NS4EA) (Non-SMC element 4 homolog A)	0.311138	3.21401	0.00389148
FKBP8	Peptidyl-prolyl cis-trans isomerase FKBP8 (PPIase FKBP8) (EC 5.2.1.8) (38 kDa FK506-binding protein) (38 kDa FKBP) (FKBP-38) (hFKBP38) (FK506-binding protein 8) (FKBP-8) (FKBPR38) (Rotamase)	0.318032	3.14433	0.0306909
AARSD1	Alanyl-tRNA synthetase domain containing 1	0.326281	3.06484	0.012029
MAP3K5	Mitogen-activated protein kinase kinase kinase 5 (EC 2.7.11.25) (Apoptosis signal-regulating kinase 1) (ASK-1) (MAPK/ERK kinase kinase 5) (MEK kinase 5) (MEKK 5)	0.328017	3.04863	0.0304654
KIF16B	#N/A	0.329451	3.03535	1.55388e-05
STK4	Serine/threonine-protein kinase 4 (EC 2.7.11.1) (Mammalian STE20-like protein kinase 1) (MST-1) (STE20-like kinase MST1) (Serine/threonine-protein kinase Krs-2) [Cleaved into: Serine/threonine-protein kinase 4 37kDa subunit (MST1/N); Serine/threonine-protein kinase 4 18kDa subunit (MST1/C)]	0.342157	2.92264	0.00443667
PIAS3	E3 SUMO-protein ligase PIAS3 (EC 2.3.2.-) (E3 SUMO-protein transferase PIAS3) (Protein inhibitor of activated STAT protein 3)	0.34684	2.88317	0.000297774
SLC25A33	#N/A	0.364697	2.742	0.0253519
SMC5	Structural maintenance of chromosomes protein 5 (SMC protein 5) (SMC-5) (hSMC5)	0.377431	2.64949	6.25249e-05
SMC6	Structural maintenance of chromosomes protein 6 (SMC protein 6) (SMC-6) (hSMC6)	0.380988	2.62476	0.00017656
NSMCE3	Non-structural maintenance of chromosomes element 3 homolog (Non-SMC element 3 homolog) (Hepatocellular carcinoma-associated protein 4) (MAGE-G1 antigen) (Melanoma-associated antigen G1) (Necdin-like protein 2)	0.382396	2.61509	0.00129922
IFRD2	Interferon-related developmental regulator 2 (Protein SKMC15)	0.382556	2.614	0.0215723
FAR2	Fatty acyl-CoA reductase (EC 1.2.1.84)	0.388762	2.57227	0.0012343
PIAS1	E3 SUMO-protein ligase PIAS1 (EC 2.3.2.-) (DEAD/H box-binding protein 1) (E3 SUMO-protein transferase PIAS1) (Gu-binding protein) (GBP) (Protein inhibitor of activated STAT protein 1) (RNA helicase II-binding protein)	0.396789	2.52023	0.000361238
RNF40	#N/A	0.399562	2.50274	0.034438
PIK3AP1	Phosphoinositide 3-kinase adapter protein 1 (B-cell adapter for phosphoinositide 3-kinase) (B-cell phosphoinositide 3-kinase adapter protein 1)	0.40592	2.46354	0.015653
GAS8	Dynein regulatory complex subunit 4 (Growth arrest-specific protein 11) (GAS-11) (Growth arrest-specific protein 8) (GAS-8)	0.416235	2.40249	0.000434828
CELF2	CUGBP Elav-like family member 2 (CELF-2) (Bruno-like protein 3) (CUG triplet repeat RNA-binding protein 2) (CUG-BP2) (CUG-BP- and ETR-3-like factor 2) (ELAV-type RNA-binding protein 3) (ETR-3) (Neuroblastoma apoptosis-related RNA-binding protein) (hNAPOR) (RNA-binding protein BRUNOL-3)	0.425798	2.34853	0.00405165
SUMO1	Small ubiquitin-related modifier 1 (SUMO-1) (GAP-modifying protein 1) (GMP1) (SMT3 homolog 3) (Sentrin) (Ubiquitin-homology domain protein PIC1) (Ubiquitin-like protein SMT3C) (Smt3C) (Ubiquitin-like protein UBL1)	0.445781	2.24325	0.00107154
EXOC2	Exocyst complex component 2 (Exocyst complex component Sec5)	0.448098	2.23166	0.0310982
GLYR1	Cytokine-like nuclear factor N-PAC (NPAC) (3-hydroxyisobutyrate dehydrogenase-like protein) (Glyoxylate reductase 1 homolog) (Nuclear protein NP60) (Nuclear protein of 60 kDa) (Nucleosome-destabilizing factor) (hNDF) (Putative oxidoreductase GLYR1)	0.451858	2.21308	8.09844e-06
LMNB2	Lamin-B2	0.458358	2.1817	0.01243
PRKD2	Serine/threonine-protein kinase D2 (EC 2.7.11.13) (nPKC-D2)	0.458424	2.18138	0.000975832
SLX4	Structure-specific endonuclease subunit SLX4 (BTB/POZ domain-containing protein 12)	0.466142	2.14527	0.000988586
SUMO3	Small ubiquitin-related modifier 3 (SUMO-3) (SMT3 homolog 1) (SUMO-2) (Ubiquitin-like protein SMT3A) (Smt3A)	0.469756	2.12876	0.00770911
SLBP	#N/A	0.4797	2.08464	0.0165299
NEIL1	#N/A	0.480182	2.08254	0.0106909
PARP12	Protein mono-ADP-ribosyltransferase PARP12 (EC 2.4.2.-) (ADP-ribosyltransferase diphtheria toxin-like 12) (ARTD12) (Poly [ADP-ribose] polymerase 12) (PARP-12) (Zinc finger CCCH domain-containing protein 1)	0.480258	2.08221	0.030161
VRK3	Inactive serine/threonine-protein kinase VRK3 (Serine/threonine-protein pseudokinase VRK3) (Vaccinia-related kinase 3)	0.481038	2.07884	0.037422
PIAS4	E3 SUMO-protein ligase PIAS4 (EC 2.3.2.27) (PIASy) (Protein inhibitor of activated STAT protein 4) (Protein inhibitor of activated STAT protein gamma) (PIAS-gamma)	0.481845	2.07536	0.00175136
GPRIN3	#N/A	0.483764	2.06712	0.0102774
FGD2	FYVE, RhoGEF and PH domain-containing protein 2 (Zinc finger FYVE domain-containing protein 4)	0.501125	1.99551	0.0395099
ADAM9	#N/A	0.507538	1.9703	0.0228106
RNF111	E3 ubiquitin-protein ligase Arkadia (EC 2.3.2.27) (RING finger protein 111) (hRNF111) (RING-type E3 ubiquitin transferase Arkadia)	0.509134	1.96412	0.0305506
MOB2	#N/A	0.510018	1.96071	0.0237739
AP3S1	AP-3 complex subunit sigma-1 (AP-3 complex subunit sigma-3A) (Adaptor-related protein complex 3 subunit sigma-1) (Clathrin-associated/assembly/adaptor protein, small 3) (Sigma-3A-adaptin) (Sigma3A-adaptin) (Sigma-adaptin 3a)	0.514394	1.94404	0.00698692
RPS6KA5	Ribosomal protein S6 kinase alpha-5 (S6K-alpha-5) (EC 2.7.11.1) (90 kDa ribosomal protein S6 kinase 5) (Nuclear mitogen- and stress-activated protein kinase 1) (RSK-like protein kinase) (RSKL)	0.51516	1.94115	0.000272588
PHC2	Polyhomeotic-like protein 2 (hPH2) (Early development regulatory protein 2)	0.518364	1.92915	0.0115665
TAP1	Antigen peptide transporter 1 (APT1) (EC 7.4.2.14) (ATP-binding cassette sub-family B member 2) (Peptide supply factor 1) (Peptide transporter PSF1) (PSF-1) (Peptide transporter TAP1) (Peptide transporter involved in antigen processing 1) (Really interesting new gene 4 protein) (RING4)	0.524638	1.90608	0.0439044
PAFAH1B2	Platelet-activating factor acetylhydrolase IB subunit alpha2 (EC 3.1.1.47) (PAF acetylhydrolase 30 kDa subunit) (PAF-AH 30 kDa subunit) (PAF-AH subunit beta) (PAFAH subunit beta)	0.5261	1.90078	0.0179377
RAD54L2	Helicase ARIP4 (EC 3.6.4.12) (Androgen receptor-interacting protein 4) (RAD54-like protein 2)	0.529871	1.88725	0.0234364
SUMO2	Small ubiquitin-related modifier 2 (SUMO-2) (HSMT3) (SMT3 homolog 2) (SUMO-3) (Sentrin-2) (Ubiquitin-like protein SMT3B) (Smt3B)	0.530855	1.88375	0.00372391
CDK9	Cyclin-dependent kinase 9 (EC 2.7.11.22) (EC 2.7.11.23) (C-2K) (Cell division cycle 2-like protein kinase 4) (Cell division protein kinase 9) (Serine/threonine-protein kinase PITALRE) (Tat-associated kinase complex catalytic subunit)	0.542064	1.8448	0.0122081
BMI1;PCGF2	#N/A	0.549314	1.82045	0.00191018
SIK1;SIK1B	Putative serine/threonine-protein kinase SIK1B (EC 2.7.11.1) (Salt-inducible kinase 1B)	0.553827	1.80562	0.0137501
PSMC1	26S proteasome regulatory subunit 4 (P26s4) (26S proteasome AAA-ATPase subunit RPT2) (Proteasome 26S subunit ATPase 1)	0.557712	1.79304	0.0375578
RRAGC;RRAGD	Ras-related GTP-binding protein C (Rag C) (RagC) (EC 3.6.5.-) (GTPase-interacting protein 2) (TIB929)	0.55954	1.78718	0.0325338
KCMF1	E3 ubiquitin-protein ligase KCMF1 (EC 2.3.2.27) (FGF-induced in gastric cancer) (Potassium channel modulatory factor) (PCMF) (RING-type E3 ubiquitin transferase KCMF1) (ZZ-type zinc finger-containing protein 1)	0.567159	1.76317	0.0170654
DGKA	Diacylglycerol kinase alpha (DAG kinase alpha) (EC 2.7.1.107) (80 kDa diacylglycerol kinase) (Diglyceride kinase alpha) (DGK-alpha)	0.57889	1.72744	0.0466338
FBXW7	F-box/WD repeat-containing protein 7 (Archipelago homolog) (hAgo) (F-box and WD-40 domain-containing protein 7) (F-box protein FBX30) (SEL-10) (hCdc4)	0.588321	1.69975	0.0466268
CLTA	#N/A	0.592777	1.68697	0.00445202
DHFR;DHFR2	#N/A	0.598608	1.67054	0.0168642
NDUFS1	NADH-ubiquinone oxidoreductase 75 kDa subunit, mitochondrial (EC 7.1.1.2) (Complex I-75kD) (CI-75kD)	0.602734	1.65911	0.0399101
NDUFA9	NADH dehydrogenase [ubiquinone] 1 alpha subcomplex subunit 9, mitochondrial (Complex I-39kD) (CI-39kD) (NADH-ubiquinone oxidoreductase 39 kDa subunit)	0.607988	1.64477	0.0209793
CTDP1	#N/A	0.610528	1.63793	0.0354458
CEP170	Centrosomal protein of 170 kDa (Cep170) (KARP-1-binding protein) (KARP1-binding protein)	0.611259	1.63597	0.00590281
FCHO1	F-BAR domain only protein 1	0.612356	1.63304	0.0020309
STK24;STK26	Serine/threonine-protein kinase 26 (EC 2.7.11.1) (MST3 and SOK1-related kinase) (Mammalian STE20-like protein kinase 4) (MST-4) (STE20-like kinase MST4) (Serine/threonine-protein kinase MASK)	0.61569	1.62419	0.0168447
DNAJC7	DnaJ homolog subfamily C member 7 (Tetratricopeptide repeat protein 2) (TPR repeat protein 2)	0.61682	1.62122	0.0135545
TNNI2	#N/A	0.617702	1.6189	0.0297424
PEX5	#N/A	0.618381	1.61713	0.0113471
SSH2	#N/A	0.625682	1.59826	0.0118703
LNPK	Endoplasmic reticulum junction formation protein lunapark (ER junction formation factor lunapark)	0.628759	1.59043	0.02298
DDX41	Probable ATP-dependent RNA helicase DDX41 (EC 3.6.4.13) (DEAD box protein 41) (DEAD box protein abstrakt homolog)	0.632796	1.58029	0.0124977
TBC1D10C	Carabin (TBC1 domain family member 10C)	0.646301	1.54727	0.00103097
PIK3R1;PIK3R2;PIK3R3	Phosphatidylinositol 3-kinase regulatory subunit beta (PI3-kinase regulatory subunit beta) (PI3K regulatory subunit beta) (PtdIns-3-kinase regulatory subunit beta) (Phosphatidylinositol 3-kinase 85 kDa regulatory subunit beta) (PI3-kinase subunit p85-beta) (PtdIns-3-kinase regulatory subunit p85-beta)	0.650221	1.53794	0.0416442
GSK3A	#N/A	0.67798	1.47497	0.0123399
NCAPG2	Condensin-2 complex subunit G2 (Chromosome-associated protein G2) (CAP-G2) (hCAP-G2) (Leucine zipper protein 5) (Non-SMC condensin II complex subunit G2)	0.684903	1.46006	0.0142122
ANKHD1	Ankyrin repeat and KH domain-containing protein 1 (HIV-1 Vpr-binding ankyrin repeat protein) (Multiple ankyrin repeats single KH domain) (hMASK)	0.694667	1.43954	0.0127474
TRIM24	Transcription intermediary factor 1-alpha (TIF1-alpha) (EC 2.3.2.27) (E3 ubiquitin-protein ligase TRIM24) (RING finger protein 82) (RING-type E3 ubiquitin transferase TIF1-alpha) (Tripartite motif-containing protein 24)	0.701156	1.42622	0.0051158
PREX1	#N/A	0.708064	1.4123	0.0364358
THUMPD3	#N/A	0.712945	1.40263	0.0150434
PDHX	#N/A	0.719555	1.38975	0.0472141
ATRX	Transcriptional regulator ATRX (EC 3.6.4.12) (ATP-dependent helicase ATRX) (X-linked helicase II) (X-linked nuclear protein) (XNP) (Znf-HX)	0.720628	1.38768	0.00401619
GMFG	#N/A	0.753122	1.32781	0.0344241
RNF25	#N/A	0.789088	1.26729	0.0093907
PTPRD	#N/A	1.15845	0.863222	0.0237974
PCARE	#N/A	1.2152	0.822907	0.0357057
RAMP2	#N/A	1.21587	0.822458	0.0369262
C14orf93	Uncharacterized protein C14orf93	1.24098	0.805816	0.0137662
ZNF407	Zinc finger protein 407	1.25758	0.795181	0.0231739
KCTD1	BTB/POZ domain-containing protein KCTD1 (Potassium channel tetramerization domain-containing protein 1)	1.38011	0.724578	0.036547
ZBTB4	Zinc finger and BTB domain-containing protein 4 (KAISO-like zinc finger protein 1) (KAISO-L1)	1.38978	0.71954	0.00228459
PIGS	#N/A	1.396	0.71633	0.0286823
ETV6	Transcription factor ETV6 (ETS translocation variant 6) (ETS-related protein Tel1) (Tel)	1.4006	0.713979	0.0203974
RPS27A;UBA52;UBB;UBC	Polyubiquitin-B [Cleaved into: Ubiquitin]	1.40968	0.709383	0.0469634
TRIM28	Transcription intermediary factor 1-beta (TIF1-beta) (E3 SUMO-protein ligase TRIM28) (EC 2.3.2.27) (KRAB-associated protein 1) (KAP-1) (KRAB-interacting protein 1) (KRIP-1) (Nuclear corepressor KAP-1) (RING finger protein 96) (RING-type E3 ubiquitin transferase TIF1-beta) (Tripartite motif-containing protein 28)	1.41362	0.707402	0.0388418
MBD1	Methyl-CpG-binding domain protein 1 (CXXC-type zinc finger protein 3) (Methyl-CpG-binding protein MBD1) (Protein containing methyl-CpG-binding domain 1)	1.41984	0.704306	0.044632
ATG4D	#N/A	1.43115	0.698739	0.043514
MTA2	Metastasis-associated protein MTA2 (Metastasis-associated 1-like 1) (MTA1-L1 protein) (p53 target protein in deacetylase complex)	1.43662	0.696078	0.0365467
RAD18	E3 ubiquitin-protein ligase RAD18 (EC 2.3.2.27) (Postreplication repair protein RAD18) (hHR18) (hRAD18) (RING finger protein 73) (RING-type E3 ubiquitin transferase RAD18)	1.44236	0.693309	0.0217292
ZBTB38	Zinc finger and BTB domain-containing protein 38	1.45601	0.686808	0.000718355
EPC1	#N/A	1.47682	0.677131	0.0205176
BRMS1L	Breast cancer metastasis-suppressor 1-like protein (BRMS1-homolog protein p40) (BRMS1-like protein p40)	1.49045	0.670938	0.0454616
WIZ	Protein Wiz (Widely-interspaced zinc finger-containing protein) (Zinc finger protein 803)	1.50027	0.666549	0.045992
PWWP2A	PWWP domain-containing protein 2A	1.51859	0.658504	0.022408
MORF4L2	#N/A	1.55283	0.643987	0.0191264
ZNF800	Zinc finger protein 800	1.55585	0.642734	0.00707579
NFRKB	Nuclear factor related to kappa-B-binding protein (DNA-binding protein R kappa-B) (INO80 complex subunit G)	1.56291	0.639833	0.0132664
ARID5B	AT-rich interactive domain-containing protein 5B (ARID domain-containing protein 5B) (MRF1-like protein) (Modulator recognition factor 2) (MRF-2)	1.5713	0.636415	0.00586448
CBX1	Chromobox protein homolog 1 (HP1Hsbeta) (Heterochromatin protein 1 homolog beta) (HP1 beta) (Heterochromatin protein p25) (M31) (Modifier 1 protein) (p25beta)	1.57558	0.634688	0.0175018
KAT14	Cysteine-rich protein 2-binding protein (CSRP2-binding protein) (ADA2A-containing complex subunit 2) (ATAC2) (CRP2-binding partner) (CRP2BP) (Lysine acetyltransferase 14)	1.58687	0.63017	0.00299033
EIF1AX;EIF1AY	Eukaryotic translation initiation factor 1A, Y-chromosomal (eIF-1A Y isoform) (eIF1A Y isoform) (Eukaryotic translation initiation factor 4C) (eIF-4C)	1.58875	0.629426	0.0350467
PHF14	PHD finger protein 14	1.59041	0.628769	0.0184592
ZNF746	Zinc finger protein 746 (Parkin-interacting substrate) (PARIS)	1.61505	0.619178	0.00145855
LATS2	#N/A	1.65423	0.604511	0.00458722
RFX1	#N/A	1.65666	0.603623	0.0097213
RANGAP1	Ran GTPase-activating protein 1 (RanGAP1)	1.67407	0.597348	0.0112739
VPS72	Vacuolar protein sorting-associated protein 72 homolog (Protein YL-1) (Transcription factor-like 1)	1.68876	0.59215	0.0058721
BAZ2A	Bromodomain adjacent to zinc finger domain protein 2A (Transcription termination factor I-interacting protein 5) (TTF-I-interacting protein 5) (Tip5) (hWALp3)	1.69085	0.591418	0.0326944
GATAD2A	Transcriptional repressor p66-alpha (Hp66alpha) (GATA zinc finger domain-containing protein 2A)	1.704	0.586853	0.0136856
CHD4	Chromodomain-helicase-DNA-binding protein 4 (CHD-4) (EC 3.6.4.12) (ATP-dependent helicase CHD4) (Mi-2 autoantigen 218 kDa protein) (Mi2-beta)	1.7158	0.582817	0.0208708
ZFP62	Zinc finger protein 62 homolog (Zfp-62)	1.72099	0.581059	0.0240223
RSF1	Remodeling and spacing factor 1 (Rsf-1) (HBV pX-associated protein 8) (Hepatitis B virus X-associated protein) (p325 subunit of RSF chromatin-remodeling complex)	1.72537	0.579586	0.00439785
ECM2;SYNPO	#N/A	1.72554	0.579528	0.0135744
KCNG3	#N/A	1.72649	0.579208	0.00469617
ZMYM4	Zinc finger MYM-type protein 4 (Zinc finger protein 262)	1.72981	0.578099	0.00226557
ZNF148	Zinc finger protein 148 (Transcription factor ZBP-89) (Zinc finger DNA-binding protein 89)	1.73086	0.577747	0.00261411
ZNF687	Zinc finger protein 687	1.7498	0.571493	2.57651e-05
HMBOX1	Homeobox-containing protein 1 (Homeobox telomere-binding protein 1) (Telomere-associated homeobox-containing protein 1)	1.75753	0.56898	0.000308907
ZNF644	Zinc finger protein 644 (Zinc finger motif enhancer-binding protein 2) (Zep-2)	1.76528	0.566482	0.000157778
ZNF777	Zinc finger protein 777	1.7805	0.561639	7.49811e-07
BEND3	BEN domain-containing protein 3	1.78257	0.560987	0.00242199
SF3B2	Splicing factor 3B subunit 2 (Pre-mRNA-splicing factor SF3b 145 kDa subunit) (SF3b145) (Spliceosome-associated protein 145) (SAP 145)	1.79309	0.557698	0.0109136
PHIP	PH-interacting protein (PHIP) (DDB1- and CUL4-associated factor 14) (IRS-1 PH domain-binding protein) (WD repeat-containing protein 11)	1.80061	0.555368	0.0331894
SMAD4	Mothers against decapentaplegic homolog 4 (MAD homolog 4) (Mothers against DPP homolog 4) (Deletion target in pancreatic carcinoma 4) (SMAD family member 4) (SMAD 4) (Smad4) (hSMAD4)	1.80243	0.554807	0.0235155
SNIP1	Smad nuclear-interacting protein 1 (FHA domain-containing protein SNIP1)	1.82992	0.546473	0.000134992
ARID4A	AT-rich interactive domain-containing protein 4A (ARID domain-containing protein 4A) (Retinoblastoma-binding protein 1) (RBBP-1)	1.83273	0.545635	0.0105193
PML	Protein PML (E3 SUMO-protein ligase PML) (EC 2.3.2.-) (Promyelocytic leukemia protein) (RING finger protein 71) (RING-type E3 SUMO transferase PML) (Tripartite motif-containing protein 19) (TRIM19)	1.83316	0.545507	0.0475821
ZSCAN25	Zinc finger and SCAN domain-containing protein 25 (Zinc finger protein 498)	1.84897	0.540843	0.0329284
CTCF	Transcriptional repressor CTCF (11-zinc finger protein) (CCCTC-binding factor) (CTCFL paralog)	1.85775	0.538284	0.00944192
N4BP2L2	NEDD4-binding protein 2-like 2 (Phosphonoformate immuno-associated protein 5)	1.85907	0.537904	0.0137308
SH2D5	#N/A	1.87588	0.533083	0.00750189
PRDM2	PR domain zinc finger protein 2 (EC 2.1.1.355) (GATA-3-binding protein G3B) (Lysine N-methyltransferase 8) (MTB-ZF) (MTE-binding protein) (PR domain-containing protein 2) (Retinoblastoma protein-interacting zinc finger protein) (Zinc finger protein RIZ)	1.88668	0.530032	0.0152937
KDM5C	Lysine-specific demethylase 5C (EC 1.14.11.67) (Histone demethylase JARID1C) (Jumonji/ARID domain-containing protein 1C) (Protein SmcX) (Protein Xe169) ([histone H3]-trimethyl-L-lysine(4) demethylase 5C)	1.90276	0.525552	0.0365119
GTF2I	General transcription factor II-I (GTFII-I) (TFII-I) (Bruton tyrosine kinase-associated protein 135) (BAP-135) (BTK-associated protein 135) (SRF-Phox1-interacting protein) (SPIN) (Williams-Beuren syndrome chromosomal region 6 protein)	1.90875	0.523904	0.00337108
PRDM1	PR domain zinc finger protein 1 (EC 2.1.1.-) (BLIMP-1) (Beta-interferon gene positive regulatory domain I-binding factor) (PR domain-containing protein 1) (Positive regulatory domain I-binding factor 1) (PRDI-BF1) (PRDI-binding factor 1)	1.9242	0.519698	0.00310336
ATP8A1	#N/A	1.92526	0.51941	0.0184874
SAP130	Histone deacetylase complex subunit SAP130 (130 kDa Sin3-associated polypeptide) (Sin3-associated polypeptide p130)	1.93154	0.517721	0.000697512
ZNF202	Zinc finger protein 202 (Zinc finger protein with KRAB and SCAN domains 10)	1.95205	0.512282	0.0139734
MGA	MAX dimerization protein MGA	1.96021	0.510149	0.0116745
ZBTB33	Transcriptional regulator Kaiso (Zinc finger and BTB domain-containing protein 33)	1.96586	0.508684	9.42411e-05
NOP58	Nucleolar protein 58 (Nucleolar protein 5)	2.00476	0.498812	0.00194079
ZBTB20	Zinc finger and BTB domain-containing protein 20 (Dendritic-derived BTB/POZ zinc finger protein) (Zinc finger protein 288)	2.00532	0.498674	0.00100934
NFIL3	Nuclear factor interleukin-3-regulated protein (E4 promoter-binding protein 4) (Interleukin-3 promoter transcriptional activator) (Interleukin-3-binding protein 1) (Transcriptional activator NF-IL3A)	2.00634	0.49842	0.000114939
ZMYM3	Zinc finger MYM-type protein 3 (Zinc finger protein 261)	2.02324	0.494256	0.0285754
ZNF646	Zinc finger protein 646	2.03354	0.491753	0.0115637
KDM5A	Lysine-specific demethylase 5A (EC 1.14.11.67) (Histone demethylase JARID1A) (Jumonji/ARID domain-containing protein 1A) (Retinoblastoma-binding protein 2) (RBBP-2) ([histone H3]-trimethyl-L-lysine(4) demethylase 5A)	2.04614	0.488726	0.0182795
L3MBTL2	Lethal(3)malignant brain tumor-like protein 2 (H-l(3)mbt-like protein 2) (L(3)mbt-like protein 2)	2.05328	0.487026	0.00442435
EP400	E1A-binding protein p400 (EC 3.6.4.-) (CAG repeat protein 32) (Domino homolog) (hDomino) (Trinucleotide repeat-containing gene 12 protein) (p400 kDa SWI2/SNF2-related protein)	2.06084	0.485239	0.0209375
ZBTB37	Zinc finger and BTB domain-containing protein 37	2.08668	0.479229	0.0152699
ZHX1	Zinc fingers and homeoboxes protein 1	2.08801	0.478925	0.0108157
RBM25	RNA-binding protein 25 (Arg/Glu/Asp-rich protein of 120 kDa) (RED120) (Protein S164) (RNA-binding motif protein 25) (RNA-binding region-containing protein 7)	2.1114	0.473619	0.00934007
RAD21	Double-strand-break repair protein rad21 homolog (hHR21) (Nuclear matrix protein 1) (NXP-1) (SCC1 homolog) [Cleaved into: 64-kDa C-terminal product (64-kDa carboxy-terminal product) (65-kDa carboxy-terminal product)]	2.14108	0.467055	0.00981985
SUPT6H	Transcription elongation factor SPT6 (hSPT6) (Histone chaperone suppressor of Ty6) (Tat-cotransactivator 2 protein) (Tat-CT2 protein)	2.15299	0.464471	0.00625124
TRRAP	Transformation/transcription domain-associated protein (350/400 kDa PCAF-associated factor) (PAF350/400) (STAF40) (Tra1 homolog)	2.16096	0.462757	0.0169767
ZNF263	Zinc finger protein 263 (Zinc finger protein FPM315) (Zinc finger protein with KRAB and SCAN domains 12)	2.16179	0.46258	0.00881851
SART1	U4/U6.U5 tri-snRNP-associated protein 1 (SNU66 homolog) (hSnu66) (Squamous cell carcinoma antigen recognized by T-cells 1) (SART-1) (hSART-1) (U4/U6.U5 tri-snRNP-associated 110 kDa protein) (allergen Hom s 1)	2.17059	0.460705	0.00548736
SMCHD1	Structural maintenance of chromosomes flexible hinge domain-containing protein 1 (SMC hinge domain-containing protein 1) (EC 3.6.1.-)	2.19574	0.455428	0.00165816
MORC3	MORC family CW-type zinc finger protein 3 (Nuclear matrix protein 2) (Zinc finger CW-type coiled-coil domain protein 3)	2.19824	0.454909	0.00523547
ZNF592	Zinc finger protein 592	2.25709	0.443047	0.00566323
EPC2	Enhancer of polycomb homolog 2 (EPC-like)	2.26809	0.440899	0.000652189
NXNL2	#N/A	2.29035	0.436615	0.017749
SP3	Transcription factor Sp3 (SPR-2)	2.32605	0.429913	0.000178739
KDM5B	Lysine-specific demethylase 5B (EC 1.14.11.67) (Cancer/testis antigen 31) (CT31) (Histone demethylase JARID1B) (Jumonji/ARID domain-containing protein 1B) (PLU-1) (Retinoblastoma-binding protein 2 homolog 1) (RBP2-H1) ([histone H3]-trimethyl-L-lysine(4) demethylase 5B)	2.37345	0.421328	0.00938224
ZKSCAN3	Zinc finger protein with KRAB and SCAN domains 3 (Zinc finger and SCAN domain-containing protein 13) (Zinc finger protein 306) (Zinc finger protein 309) (Zinc finger protein 47 homolog) (Zf47) (Zfp-47)	2.39589	0.417381	0.010072
XBP1	X-box-binding protein 1 (XBP-1) (Tax-responsive element-binding protein 5) (TREB-5) [Cleaved into: X-box-binding protein 1, cytoplasmic form; X-box-binding protein 1, luminal form]	2.42678	0.412069	0.0069424
PBRM1	Protein polybromo-1 (hPB1) (BRG1-associated factor 180) (BAF180) (Polybromo-1D)	2.48466	0.40247	0.009831
CASZ1	Zinc finger protein castor homolog 1 (Castor-related protein) (Putative survival-related protein) (Zinc finger protein 693)	2.48759	0.401995	0.0403978
BPTF	Nucleosome-remodeling factor subunit BPTF (Bromodomain and PHD finger-containing transcription factor) (Fetal Alz-50 clone 1 protein) (Fetal Alzheimer antigen)	2.54753	0.392537	0.0037763
ARID4B	#N/A	2.57871	0.38779	0.00184927
BRD8	Bromodomain-containing protein 8 (Skeletal muscle abundant protein) (Skeletal muscle abundant protein 2) (Thyroid hormone receptor coactivating protein of 120 kDa) (TrCP120) (p120)	2.58536	0.386793	0.00449765
ITGA1	Integrin alpha-1 (CD49 antigen-like family member A) (Laminin and collagen receptor) (VLA-1) (CD antigen CD49a)	2.60995	0.383149	0.00461829
TAF1	Transcription initiation factor TFIID subunit 1 (EC 2.3.1.48) (EC 2.7.11.1) (Cell cycle gene 1 protein) (TBP-associated factor 250 kDa) (p250) (Transcription initiation factor TFIID 250 kDa subunit) (TAF(II)250) (TAFII-250) (TAFII250)	2.61245	0.382782	2.3582e-05
TCF20	Transcription factor 20 (TCF-20) (Nuclear factor SPBP) (Protein AR1) (Stromelysin-1 PDGF-responsive element-binding protein) (SPRE-binding protein)	2.64313	0.378339	0.0330798
RLF	Zinc finger protein Rlf (Rearranged L-myc fusion gene protein) (Zn-15-related protein)	2.65157	0.377135	0.00173149
SLC7A5;SLC7A6;SLC7A7	Large neutral amino acids transporter small subunit 1 (4F2 light chain) (4F2 LC) (4F2LC) (CD98 light chain) (Integral membrane protein E16) (E16) (L-type amino acid transporter 1) (hLAT1) (Solute carrier family 7 member 5) (y+ system cationic amino acid transporter)	2.65538	0.376594	0.000901836
DMAP1	DNA methyltransferase 1-associated protein 1 (DNMAP1) (DNMT1-associated protein 1)	2.78837	0.358632	0.000136692
ZNF827	Zinc finger protein 827	2.81321	0.355465	0.0479056
DNTTIP2	Deoxynucleotidyltransferase terminal-interacting protein 2 (Estrogen receptor-binding protein) (LPTS-interacting protein 2) (LPTS-RP2) (Terminal deoxynucleotidyltransferase-interacting factor 2) (TdIF2) (TdT-interacting factor 2)	2.98249	0.335291	0.000501668
BAZ1A	Bromodomain adjacent to zinc finger domain protein 1A (ATP-dependent chromatin-remodeling protein) (ATP-utilizing chromatin assembly and remodeling factor 1) (hACF1) (CHRAC subunit ACF1) (Williams syndrome transcription factor-related chromatin-remodeling factor 180) (WCRF180) (hWALp1)	2.98521	0.334985	0.0207995
ZNF611	#N/A	3.0118	0.332028	0.000297961
UTP3	Something about silencing protein 10 (Charged amino acid-rich leucine zipper 1) (CRL1) (Disrupter of silencing SAS10) (UTP3 homolog)	3.16982	0.315475	0.0022693
XPO6	#N/A	3.54234	0.282299	0.00330742
UTP20	Small subunit processome component 20 homolog (Down-regulated in metastasis protein) (Novel nucleolar protein 73) (NNP73) (Protein Key-1A6)	3.60131	0.277677	0.00837589
ACOT2	#N/A	4.52087	0.221196	0.00469636
MBOAT7	Lysophospholipid acyltransferase 7 (LPLAT 7) (EC 2.3.1.-) (1-acylglycerophosphatidylinositol O-acyltransferase) (Bladder and breast carcinoma-overexpressed gene 1 protein) (Leukocyte receptor cluster member 4) (Lysophosphatidylinositol acyltransferase) (LPIAT) (Lyso-PI acyltransferase) (Membrane-bound O-acyltransferase domain-containing protein 7) (O-acyltransferase domain-containing protein 7) (…	4.89994	0.204084	0.0274239
KDM2B	Lysine-specific demethylase 2B (EC 1.14.11.27) (CXXC-type zinc finger protein 2) (F-box and leucine-rich repeat protein 10) (F-box protein FBL10) (F-box/LRR-repeat protein 10) (JmjC domain-containing histone demethylation protein 1B) (Jumonji domain-containing EMSY-interactor methyltransferase motif protein) (Protein JEMMA) (Protein-containing CXXC domain 2) ([Histone-H3]-lysine-36 demethylase 1B)	4.94328	0.202295	0.00178434
DICER1	#N/A	39.0286	0.0256222	0.0018021
